# Supplementary material for: On the Brønsted acid-catalyzed aza-Michael reaction of isoxazol-5-ones to enones: reaction optimization, scope, mechanistic investigations and scale-up
Source: Royal Society of Chemistry journal article supplement (doi:10.1039/d3re00050h), 2023-01-01
Supplement: d3re00050h1.pdf [file d3re00050h1.pdf]

# On the Brønsted Acid-Catalyzed *aza*-Michael Reaction of Isoxazol-5-ones to Enones: Reaction Optimization, Scope, Mechanistic Investigations and Scale-up

Marcelo M. de Siqueira,<sup>a</sup> Pedro P. de Castro, <sup>\*b</sup> Juliana A. dos Santos, <sup>a</sup> Leonã S. Flores, <sup>a</sup> Walysson F. de Paiva, <sup>c</sup> Sergio A. Fernandes <sup>c</sup> and Giovanni W. Amarante <sup>\*a</sup>

<sup>a</sup>Chemistry Department, Federal University of Juiz de Fora, Campus Martelos, Juiz de Fora, Minas Gerais, 36036-900, Brazil.

<sup>b</sup>Chemistry Department, Federal University of São Carlos, São Carlos, São Paulo, 13565-905, Brazil.

<sup>c</sup>Chemistry Department, Federal University of Viçosa, Viçosa, Minas Gerais, 36570-900, Brazil.

\* Correspondence: pedro\_possa@hotmail.com; giovanni.amarante@ufjf.br

## Supplementary Information

## Table of contents

|                                                                                                                                                  |     |
|--------------------------------------------------------------------------------------------------------------------------------------------------|-----|
| 1. NMR and IR spectra of isoxazol-5-ones ( <b>2a-2f</b> ) and its precursors .....                                                               | S3  |
| 2. NMR and IR spectra of compounds <b>3a-3u</b> and <b>4a</b> .....                                                                              | S23 |
| 3. X-ray measurement .....                                                                                                                       | S56 |
| 4. Control experiments .....                                                                                                                     | S62 |
| 4.1. Reaction with DCl .....                                                                                                                     | S62 |
| 4.2. Competition experiment between DCl and CX <sub>4</sub> SO <sub>3</sub> H .....                                                              | S63 |
| 5. General procedure for the synthesis of <i>p</i> -sulfonic acid calix[4]arene (CX <sub>4</sub> SO <sub>3</sub> H) .....                        | S64 |
| 5.1. NMR and IR spectra of CX <sub>4</sub> SO <sub>3</sub> H .....                                                                               | S64 |
| 6. Energy profile of the evaluated mechanisms .....                                                                                              | S66 |
| 7. Imaginary frequencies for all transition states and intrinsic reaction coordinates .....                                                      | S68 |
| 8. Electronic energies (E), Enthalpies (H) and Gibbs free energies (G) of all optimized structures ...                                           | S69 |
| 9. Electronic energies ( $\Delta E$ ), enthalpies ( $\Delta H$ ) and Gibbs free energies ( $\Delta G$ ) variation along each reaction step ..... | S70 |
| 10. Images of all optimized structures and selected bond lengths .....                                                                           | S71 |
| 11. Coordinates of Optimized Stationary Points .....                                                                                             | S80 |

# 1. NMR and IR spectra of isoxazol-5-ones (2a-2f) and its precursors

Figure S1. FT-IR (NaCl) of 3-phenylisoxazol-5(4H)-one

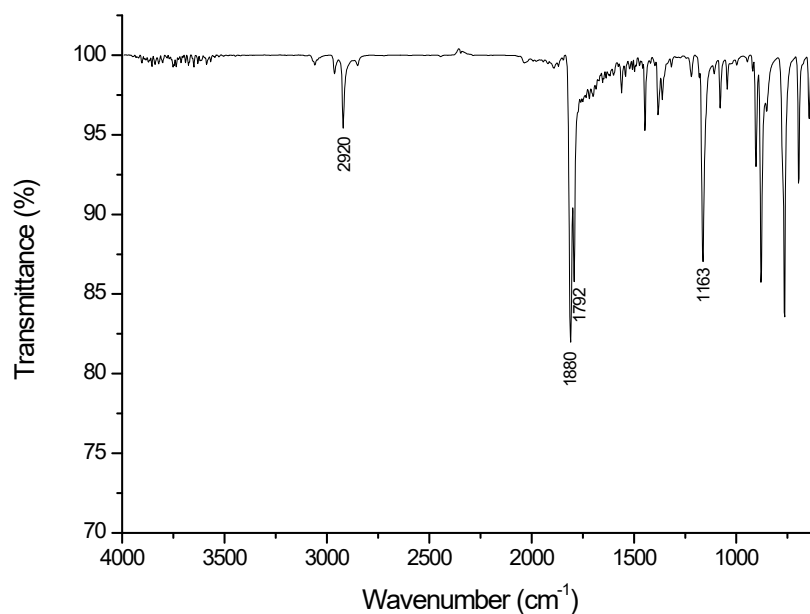

Figure S2. <sup>1</sup>H NMR (500 MHz, CDCl<sub>3</sub>) of 3-phenylisoxazol-5(4H)-one

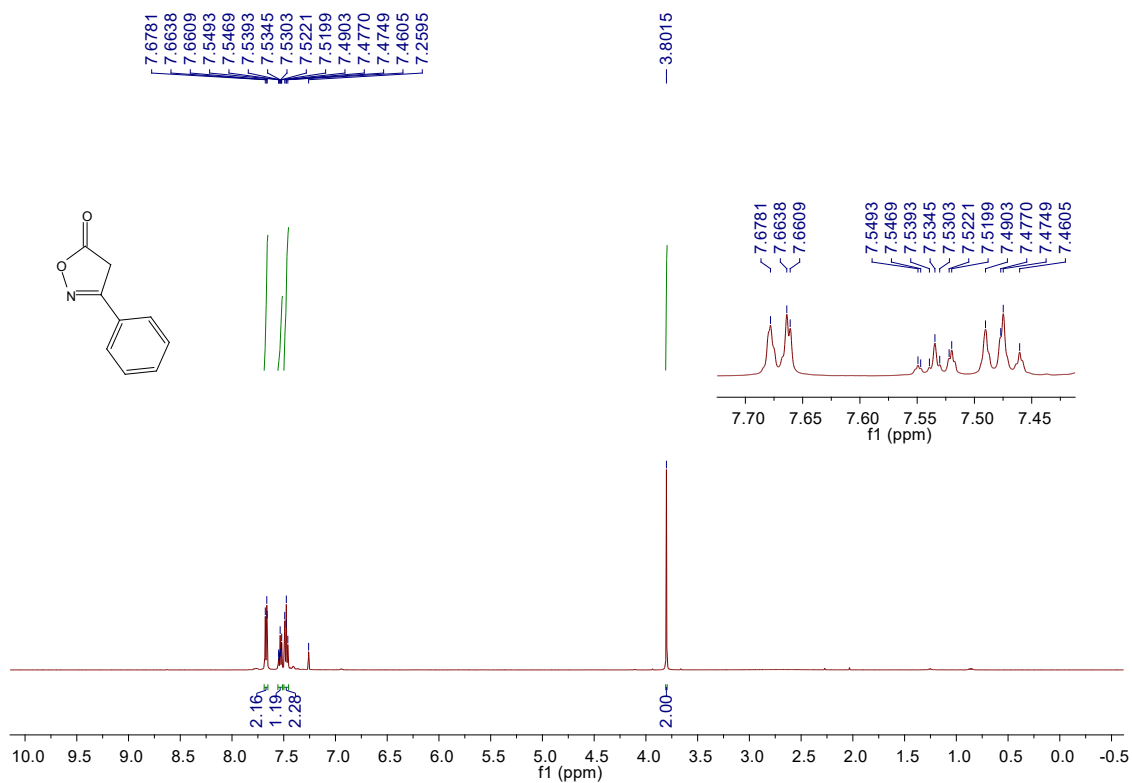

Figure S3.  $^{13}\text{C}$  { $^1\text{H}$ } NMR (125 MHz,  $\text{CDCl}_3$ ) of 3-phenylisoxazol-5(4H)-one

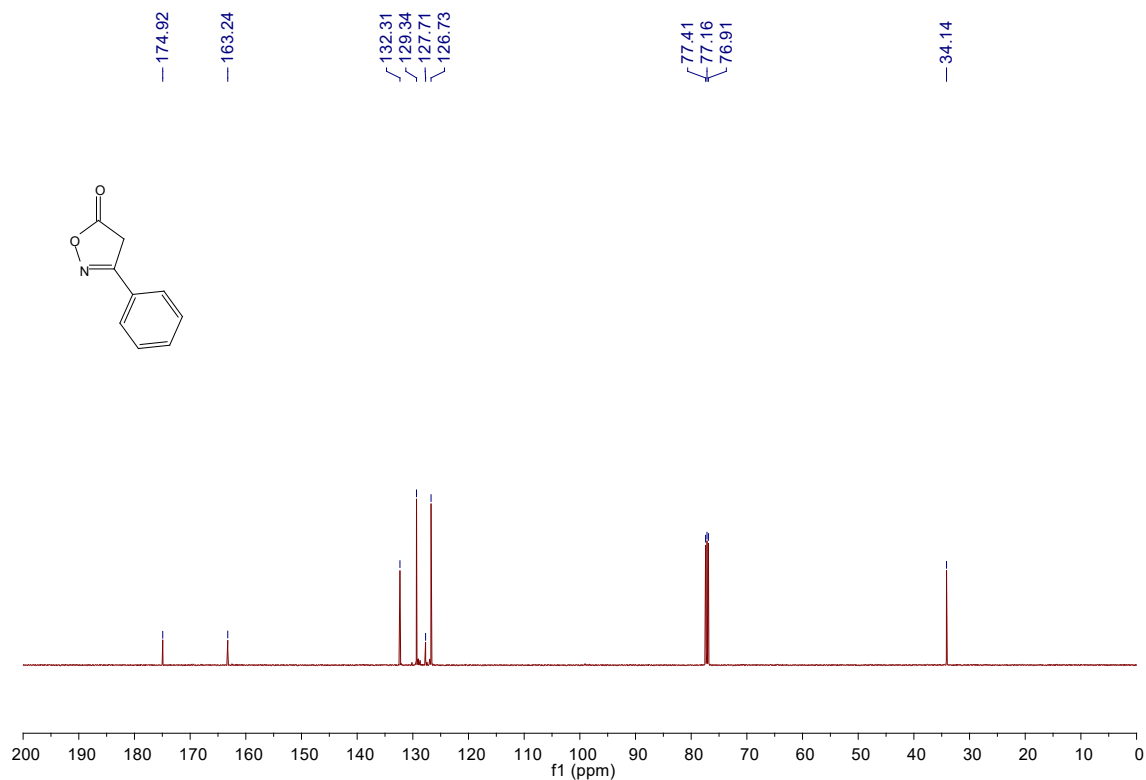

Figure S4. FT-IR (NaCl) of *(Z)*-4-(benzylidene)-3-phenylisoxazol-5(4H)-one

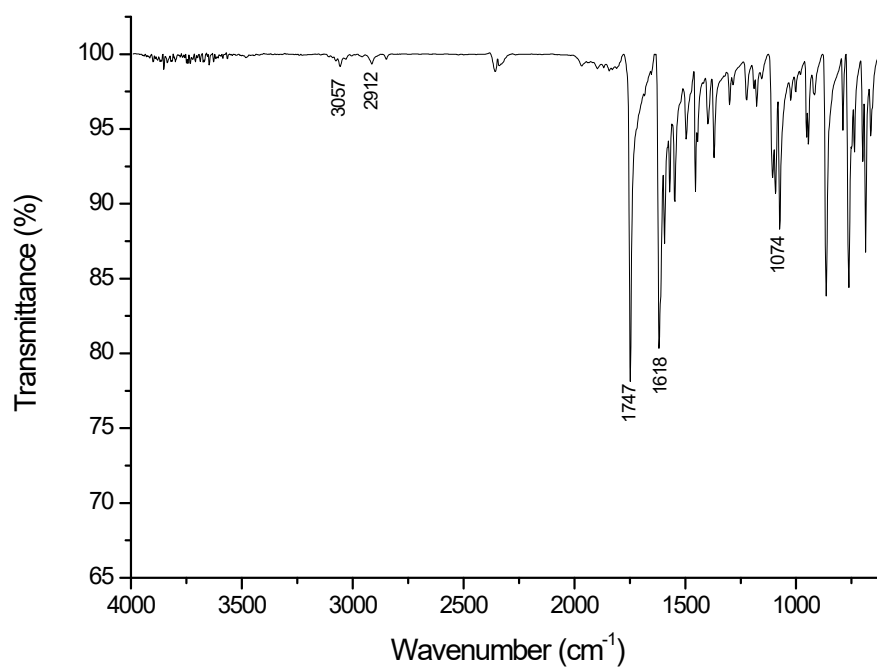

Figure S5.  $^1\text{H}$  NMR (500 MHz,  $\text{CDCl}_3$ ) of (Z)-4-(benzylidene)-3-phenylisoxazol-5(4H)-one

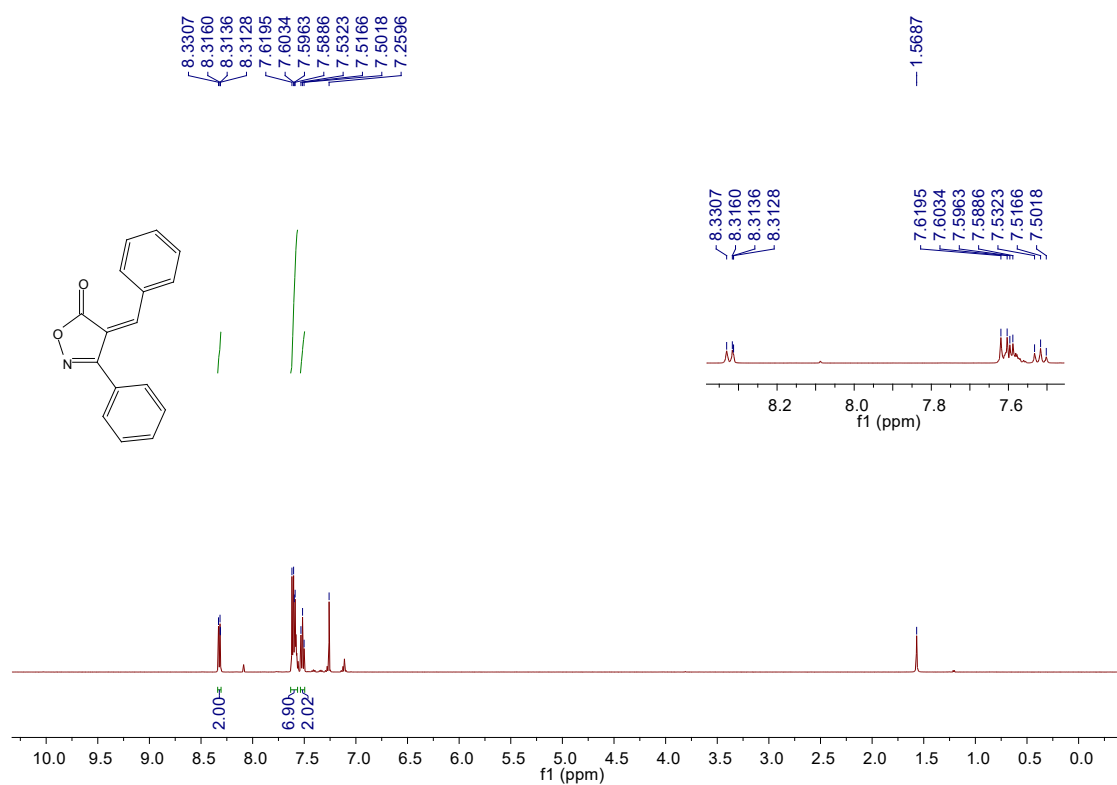

Figure S6.  $^{13}\text{C}$  { $^1\text{H}$ } NMR (125 MHz,  $\text{CDCl}_3$ ) of (Z)-4-(benzylidene)-3-phenylisoxazol-5(4H)-one

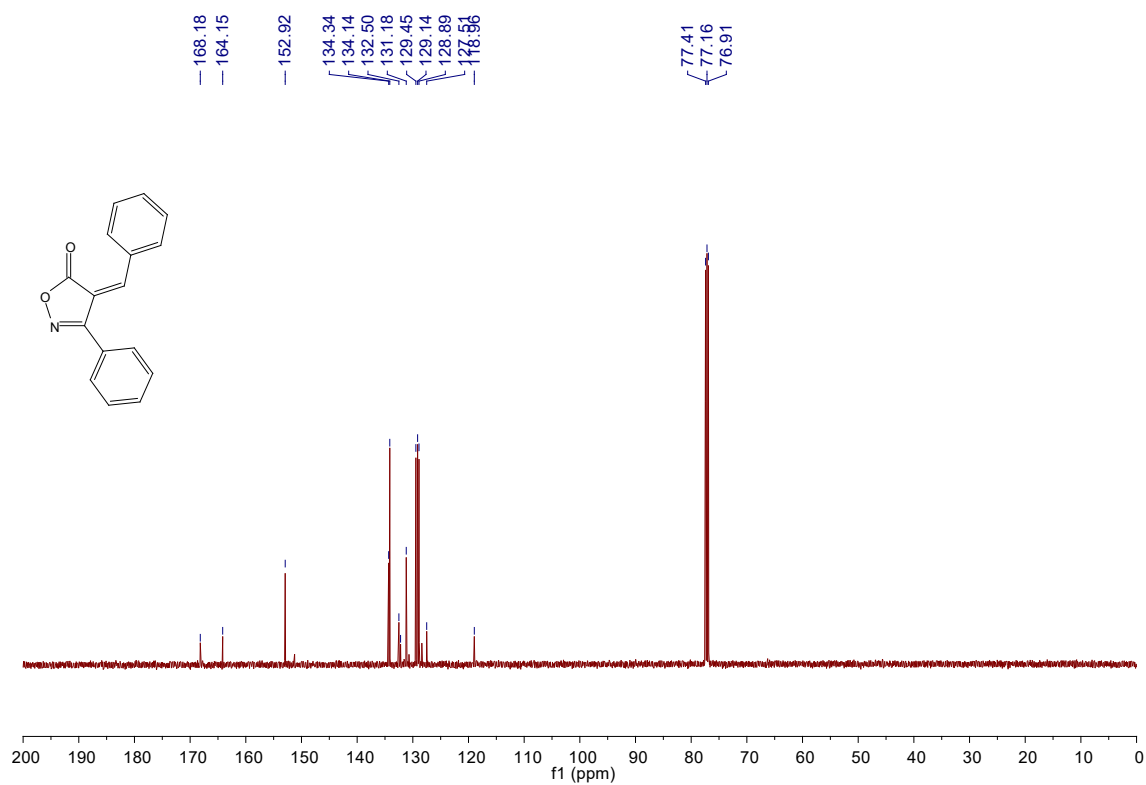

Figure S7. FT-IR (NaCl) of (Z)-4-(2-chlorobenzylidene)-3-phenylisoxazol-5(4H)-one

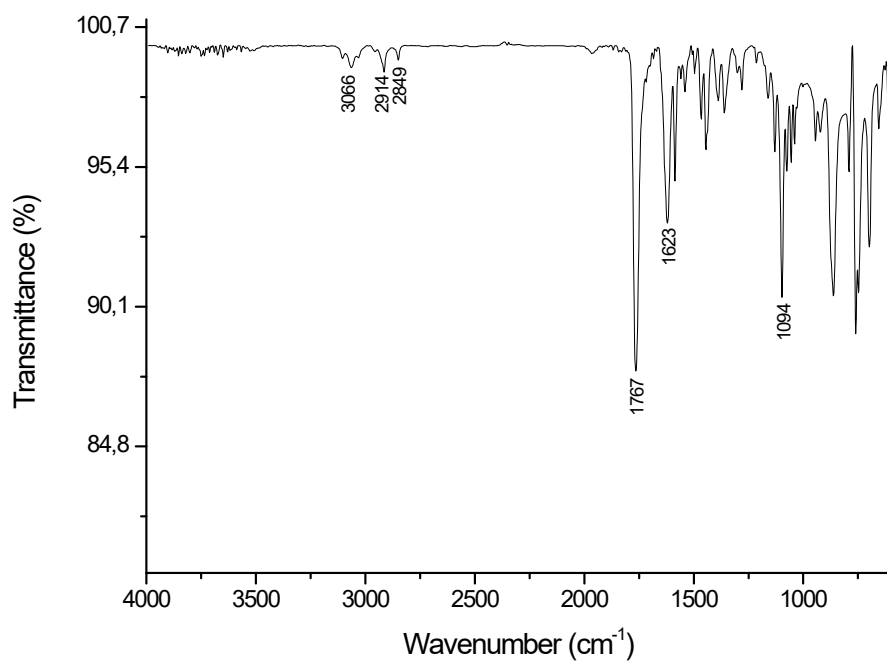

Figure S8. <sup>1</sup>H NMR (500 MHz, CDCl<sub>3</sub>) of (Z)-4-(2-chlorobenzylidene)-3-phenylisoxazol-5(4H)-one]

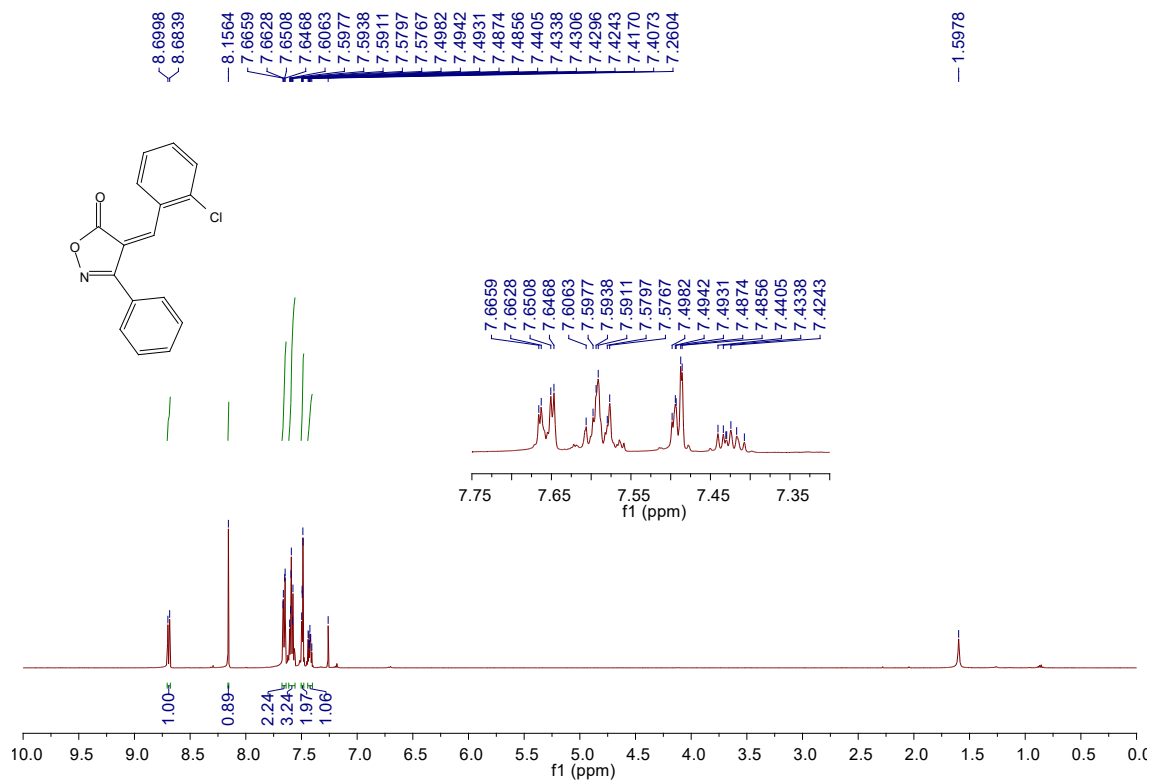

Figure S9.  $^{13}\text{C}$  { $^1\text{H}$ } NMR (125 MHz,  $\text{CDCl}_3$ ) of (Z)-4-(2-chlorobenzylidene)-3-phenylisoxazol-5(4H)-one

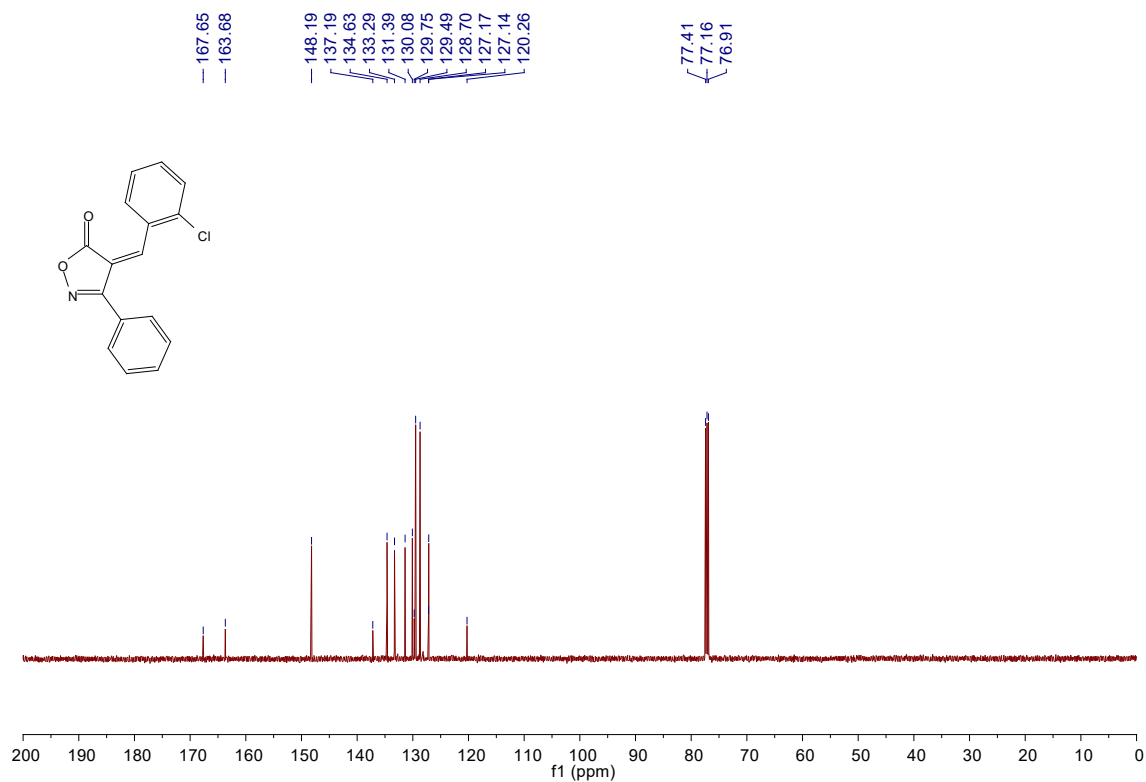

Figure S10. FT-IR (NaCl) of (Z)-4-(3-chlorobenzylidene)-3-phenylisoxazol-5(4H)-one

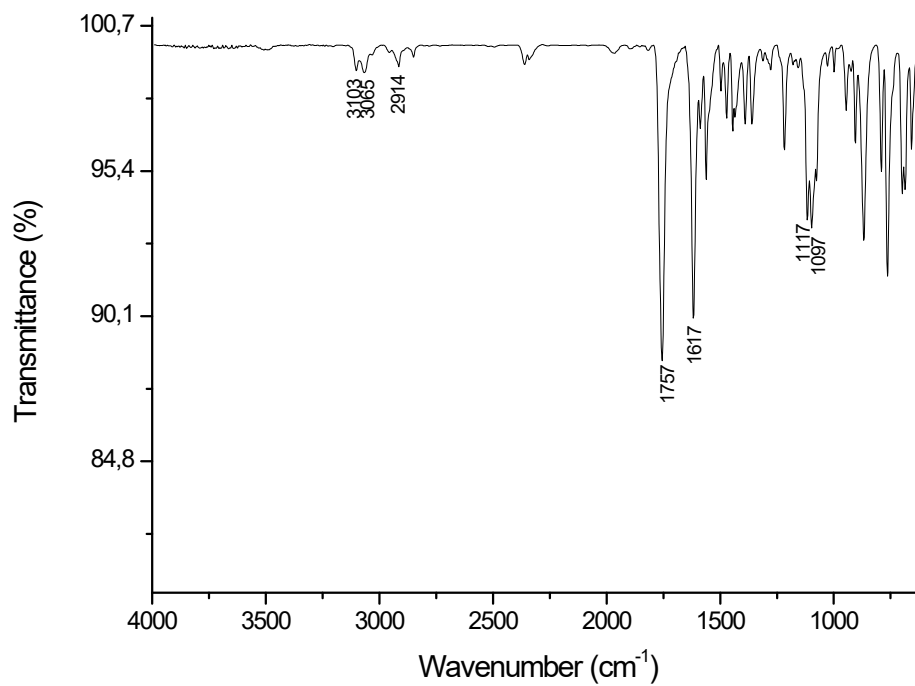

Figure S11.  $^1\text{H}$  NMR (500 MHz,  $\text{CDCl}_3$ ) of (Z)-4-(3-chlorobenzylidene)-3-phenylisoxazol-5(4H)-one

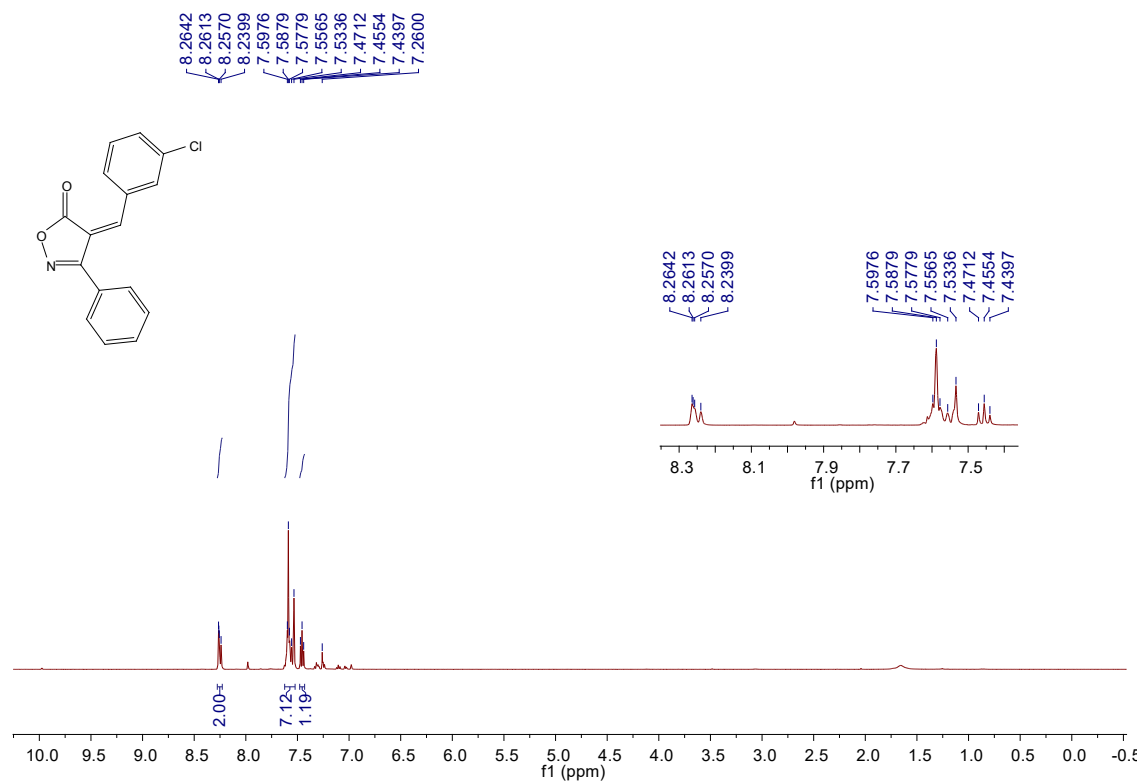

Figure S12.  $^{13}\text{C}$  { $^1\text{H}$ } NMR (125 MHz,  $\text{CDCl}_3$ ) of (Z)-4-(3-chlorobenzylidene)-3-phenylisoxazol-5(4H)-one

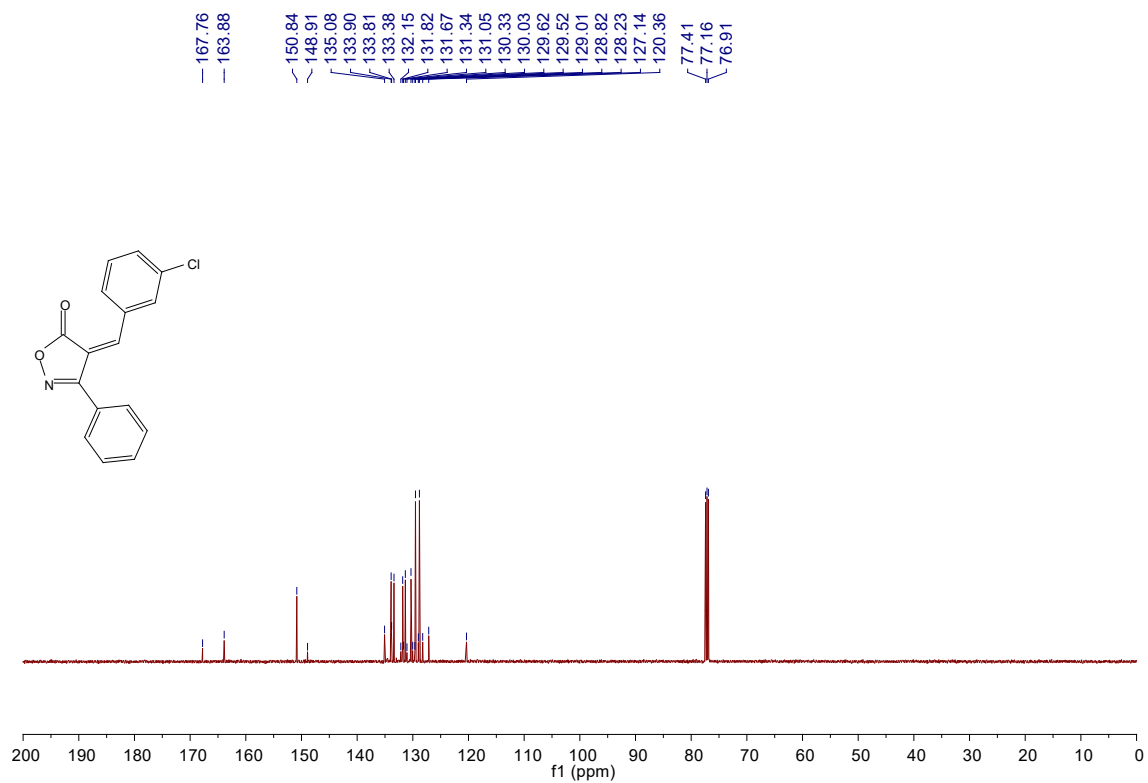



Figure S13. FT-IR (NaCl) of *(Z)*-4-(4-chlorobenzylidene)-3-phenylisoxazol-5(4H)-one

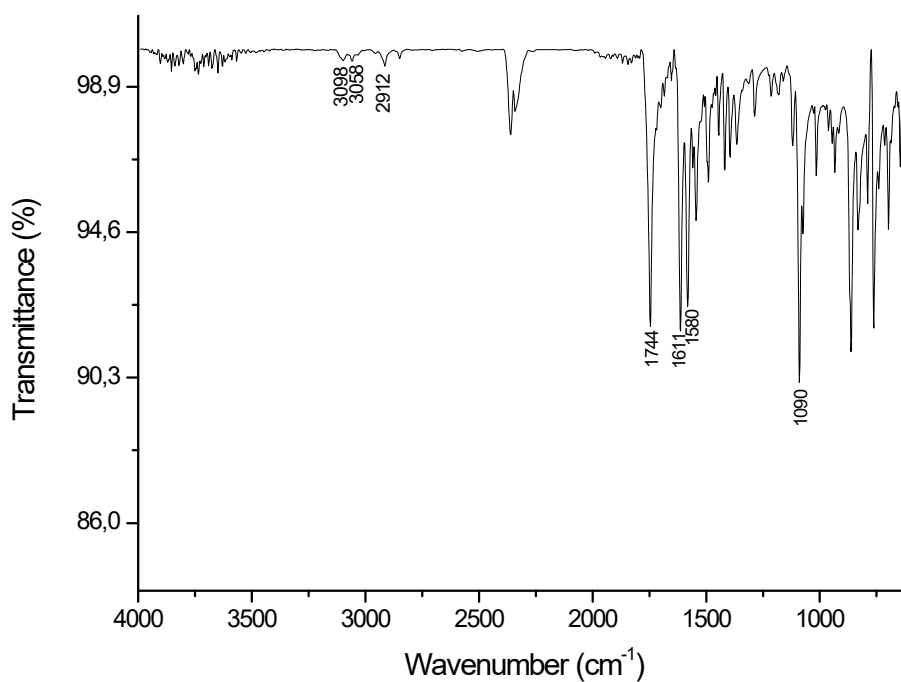

Figure S14. <sup>1</sup>H NMR (500 MHz, CDCl<sub>3</sub>) of *(Z)*-4-(4-chlorobenzylidene)-3-phenylisoxazol-5(4H)-one

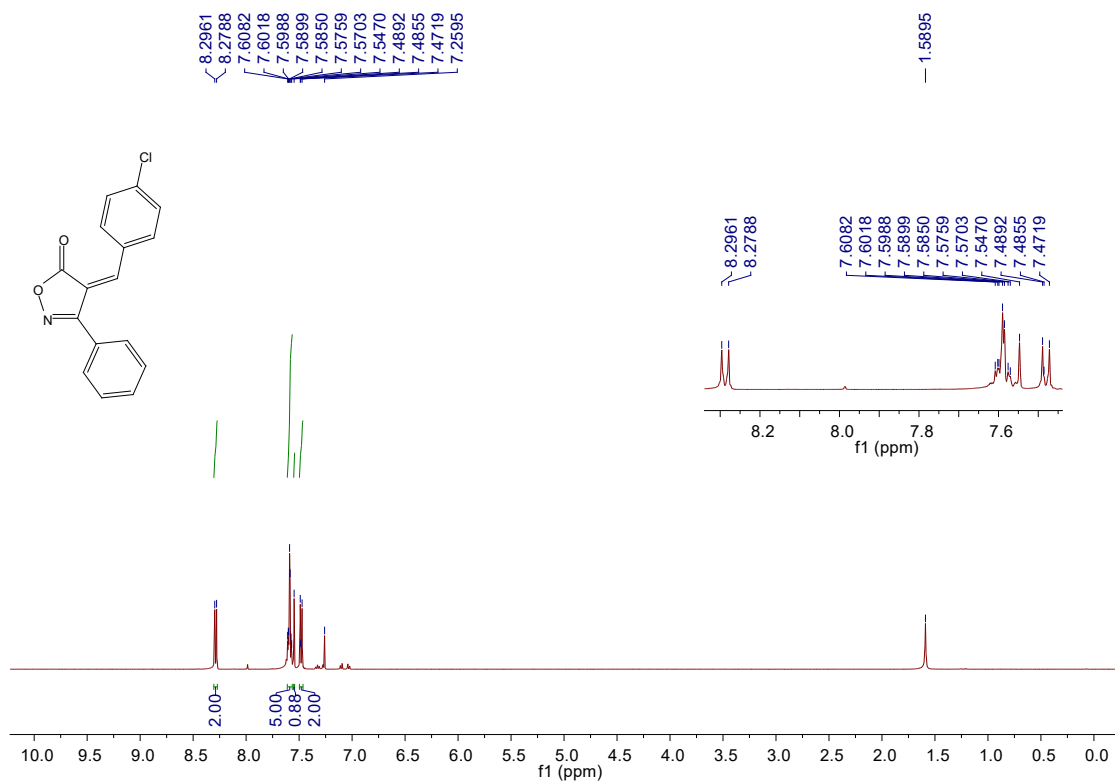

Figure S15.  $^{13}\text{C}$  { $^1\text{H}$ } NMR (125 MHz,  $\text{CDCl}_3$ ) of (Z)-4-(4-chlorobenzylidene)-3-phenylisoxazol-5(4H)-one

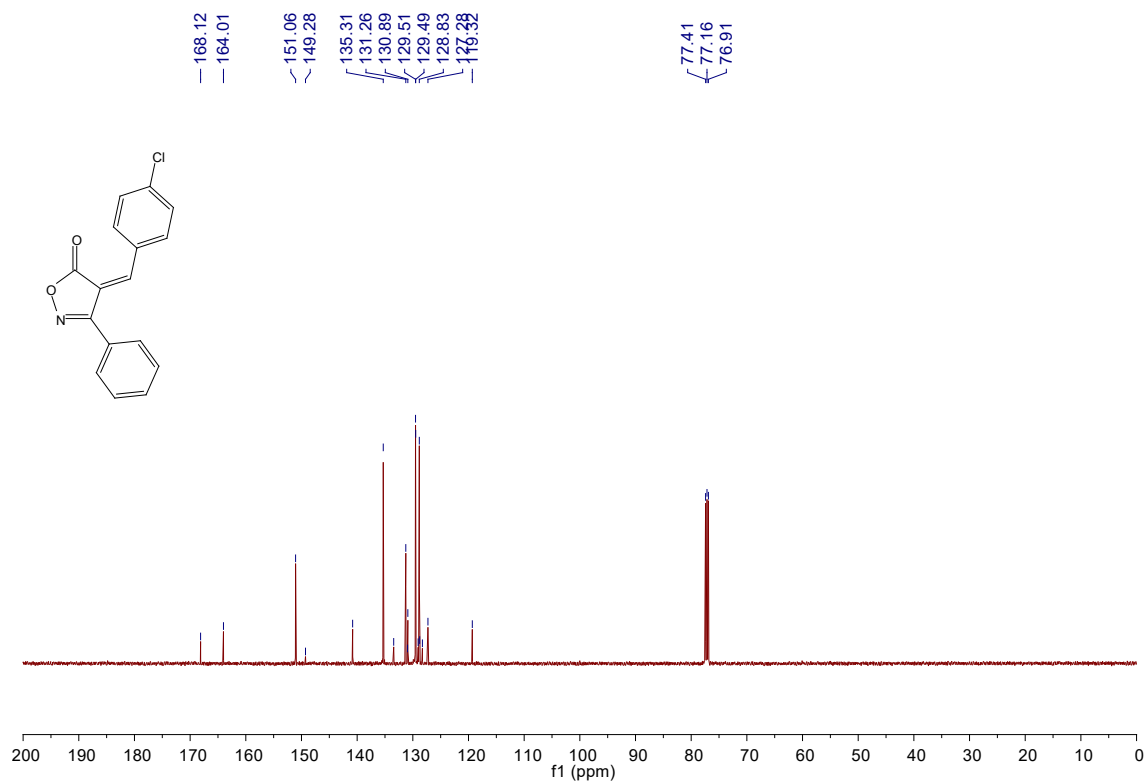

Figure S16. FT-IR (NaCl) of (Z)-4-(4-methoxybenzylidene)-3-phenylisoxazol-5(4H)-one

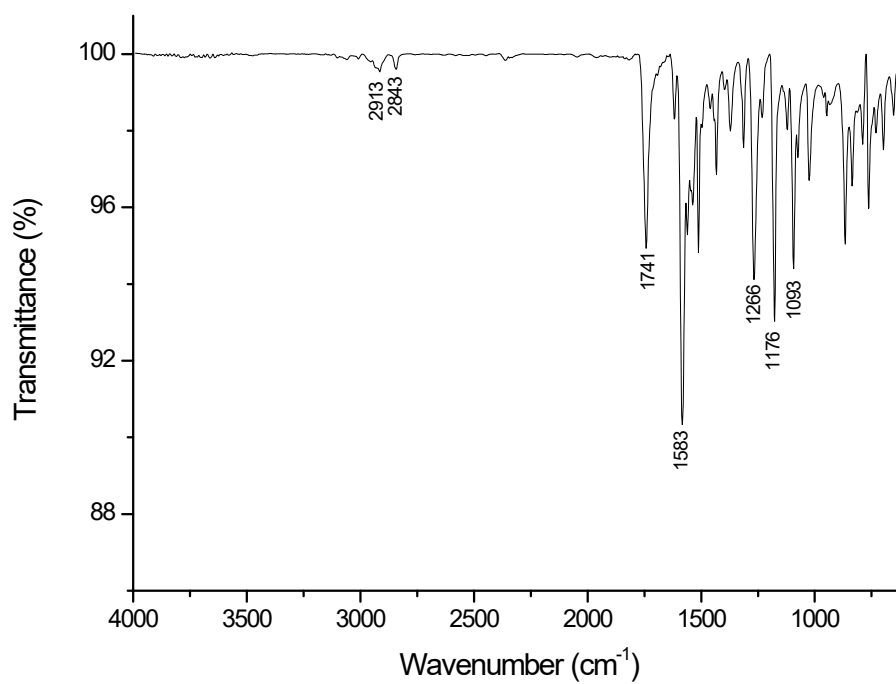

Figure S17.  $^1\text{H}$  NMR (500 MHz,  $\text{CDCl}_3$ ) of *(Z)*-4-(4-methoxybenzylidene)-3-phenylisoxazol-5(4H)-one

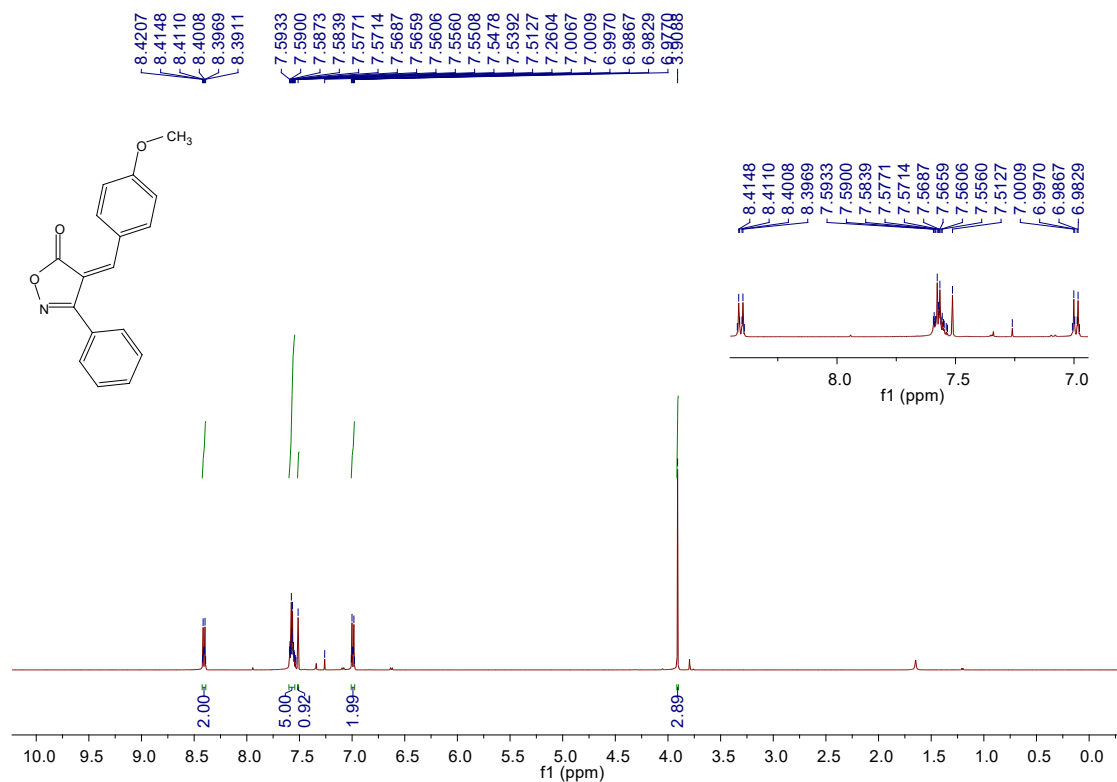

Figure S18.  $^{13}\text{C}$   $\{^1\text{H}\}$  NMR (125 MHz,  $\text{CDCl}_3$ ) of *(Z)*-4-(4-methoxybenzylidene)-3-phenylisoxazol-5(4H)-one

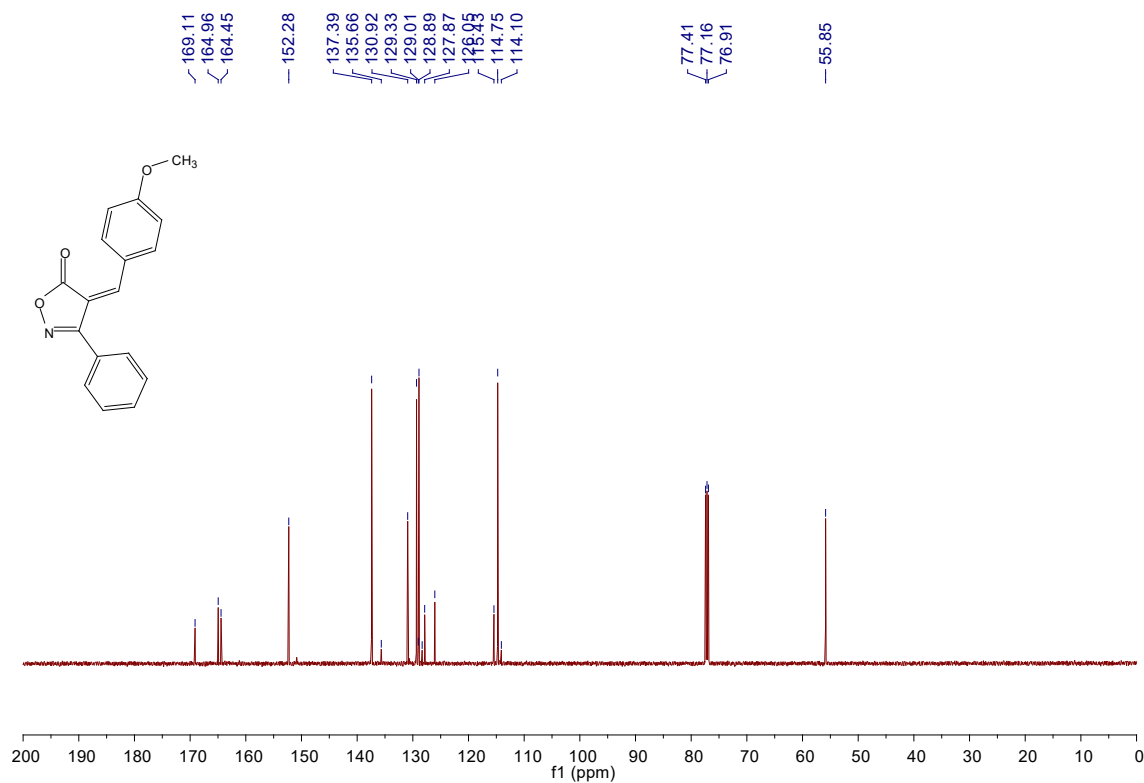

Figure S19. FT-IR (NaCl) of (Z)-4-(furan-2-ylmethylene)-3-phenylisoxazol-5(4H)-one

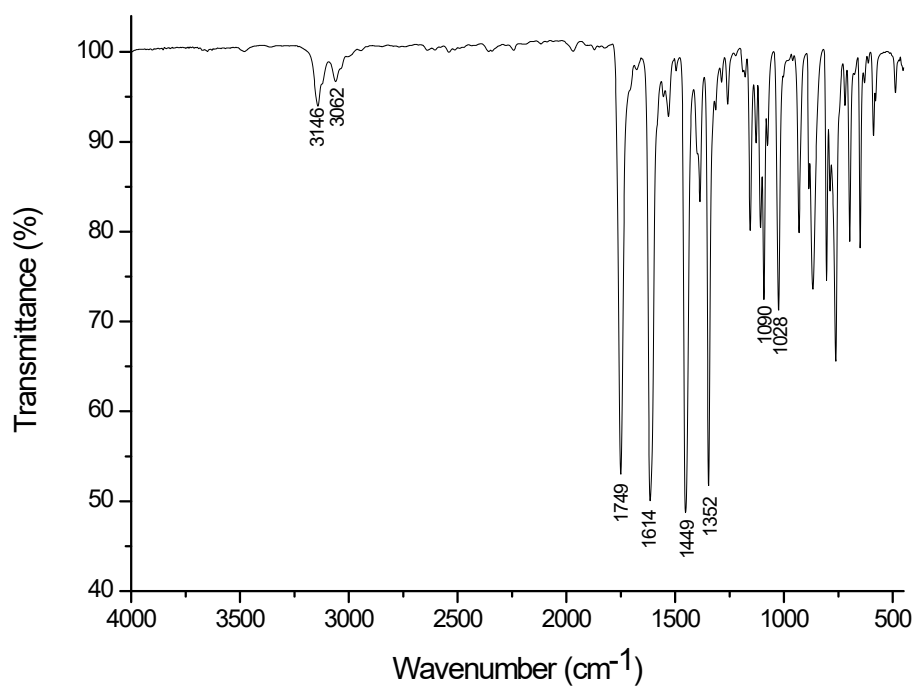

Figure S20. <sup>1</sup>H NMR (500 MHz, CDCl<sub>3</sub>) of (Z)-4-(furan-2-ylmethylene)-3-phenylisoxazol-5(4H)-one

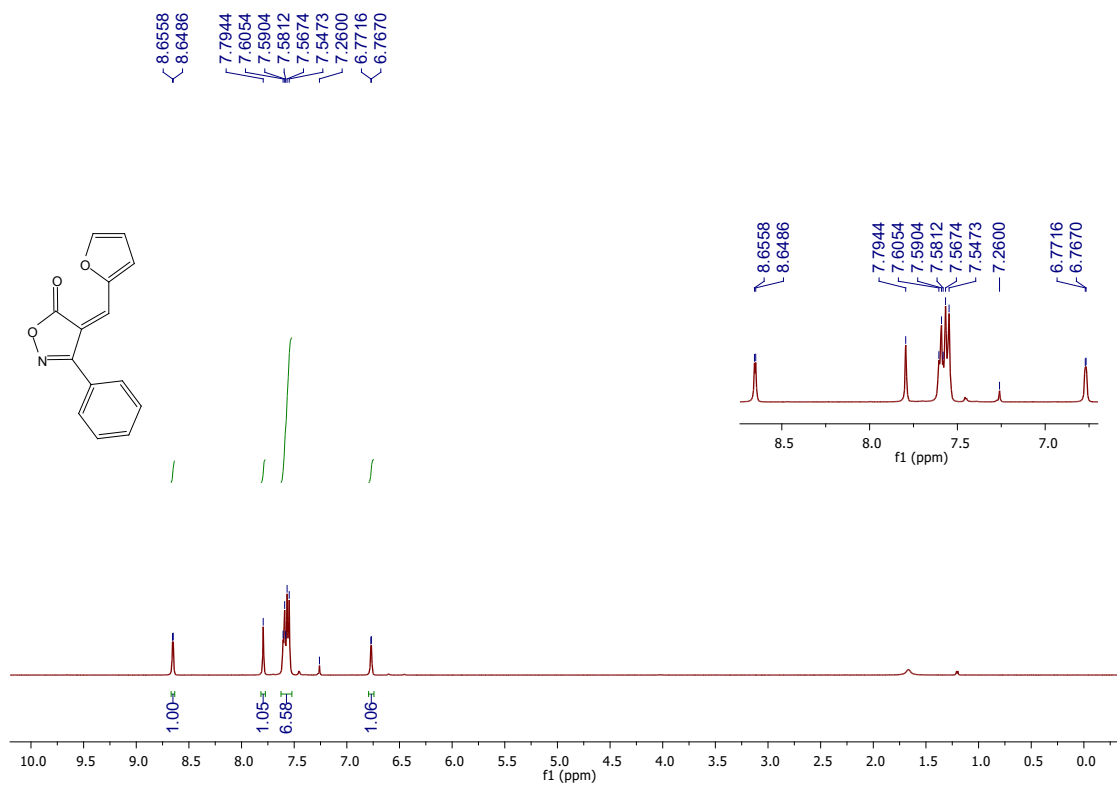

Figure S21.  $^{13}\text{C}$  { $^1\text{H}$ } NMR (125 MHz,  $\text{CDCl}_3$ ) of (Z)-4-(furan-2-ylmethylene)-3-phenylisoxazol-5(4H)-one

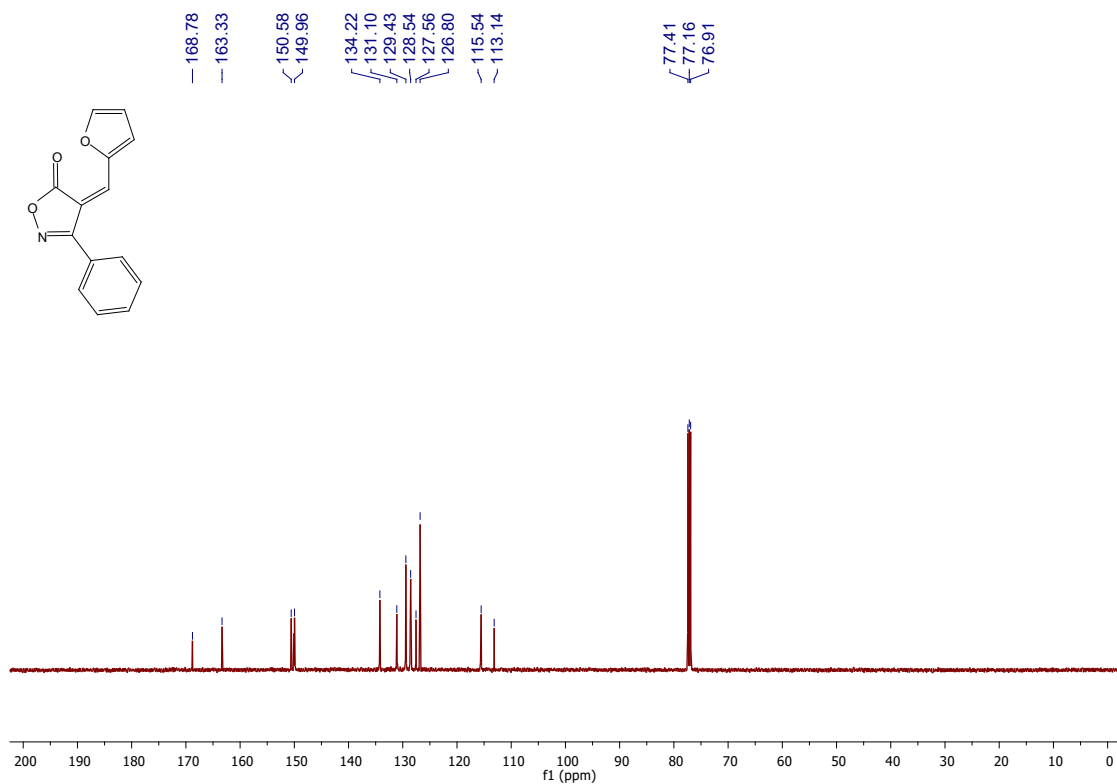

Figure S22. FT-IR (NaCl) of 4-benzyl-3-phenylisoxazol-5(4H)-one

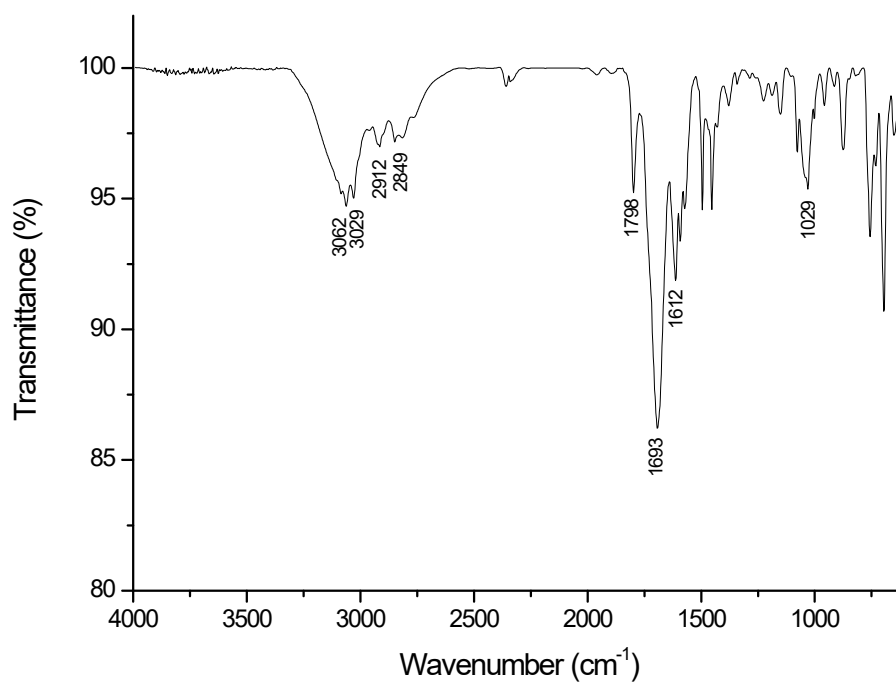

Figure S23.  $^1\text{H}$  NMR (500 MHz,  $\text{CDCl}_3$ ) of 4-benzyl-3-phenylisoxazol-5(4H)-one

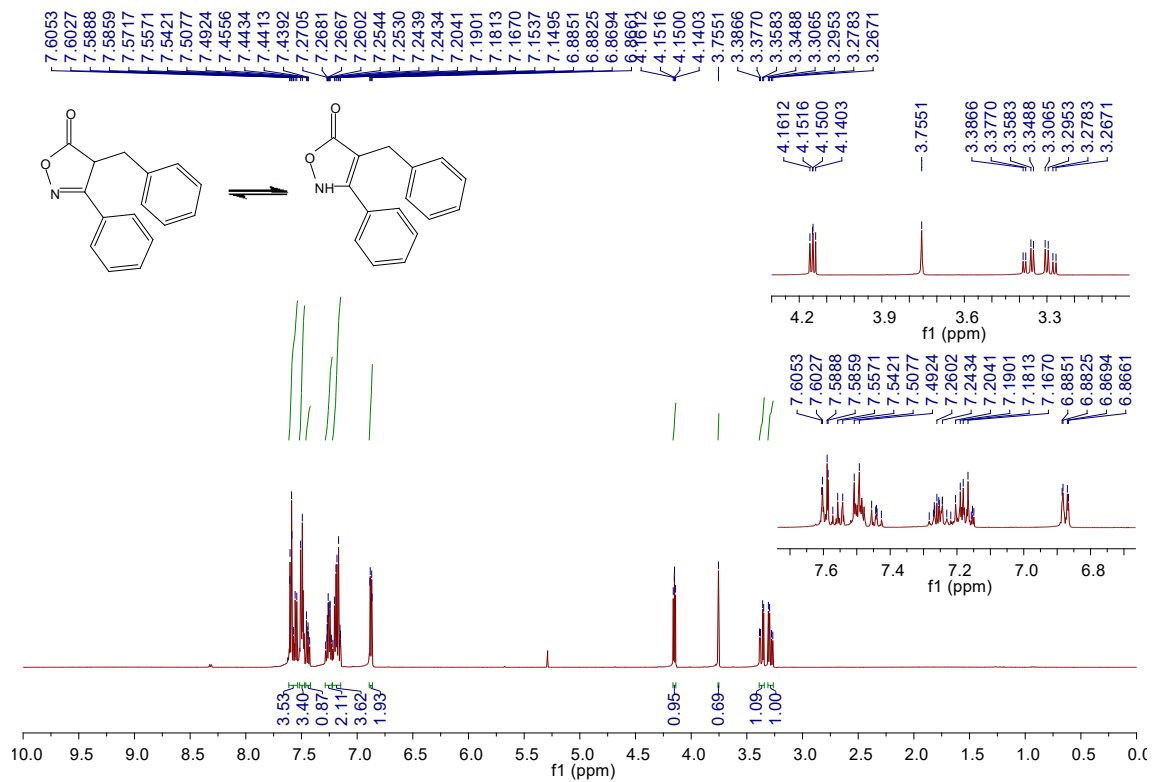

Figure S24.  $^{13}\text{C}$  { $^1\text{H}$ } NMR (125 MHz,  $\text{CDCl}_3$ ) of 4-benzyl-3-phenylisoxazol-5(4H)-one

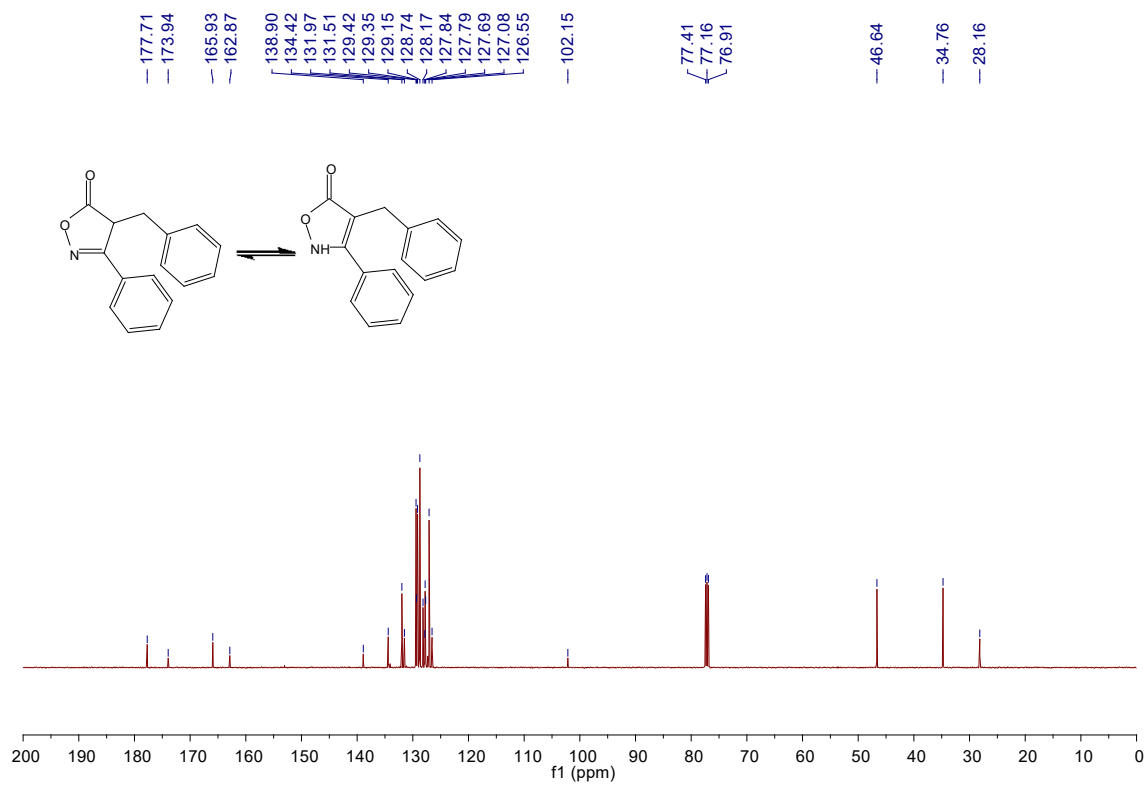

Figure S25. FT-IR (NaCl) of 4-(2-chlorobenzyl)-3-phenylisoxazol-5(4H)-one

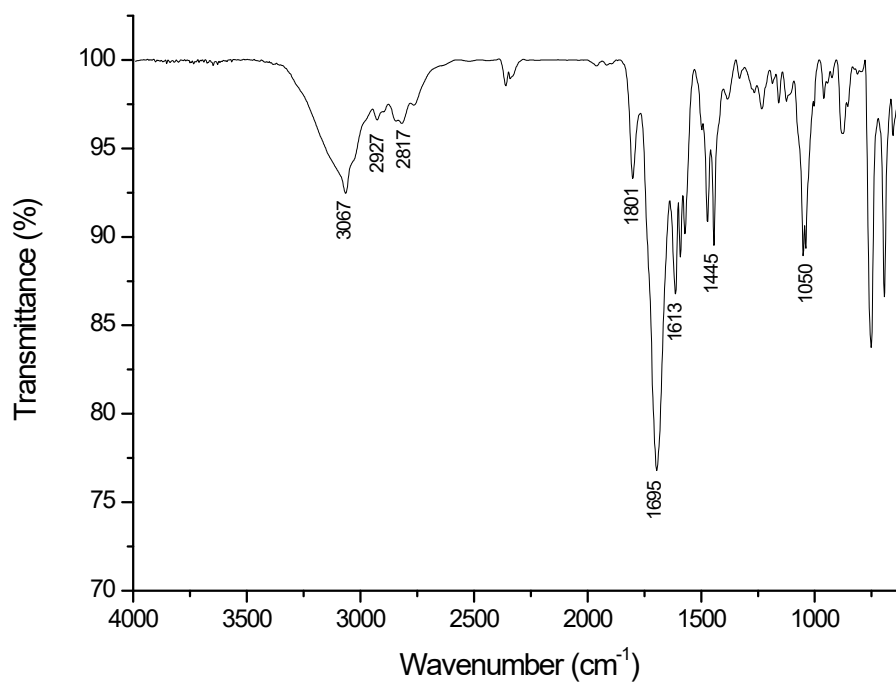

Figure S26. <sup>1</sup>H NMR (500 MHz, CDCl<sub>3</sub>) of 4-(2-chlorobenzyl)-3-phenylisoxazol-5(4H)-one

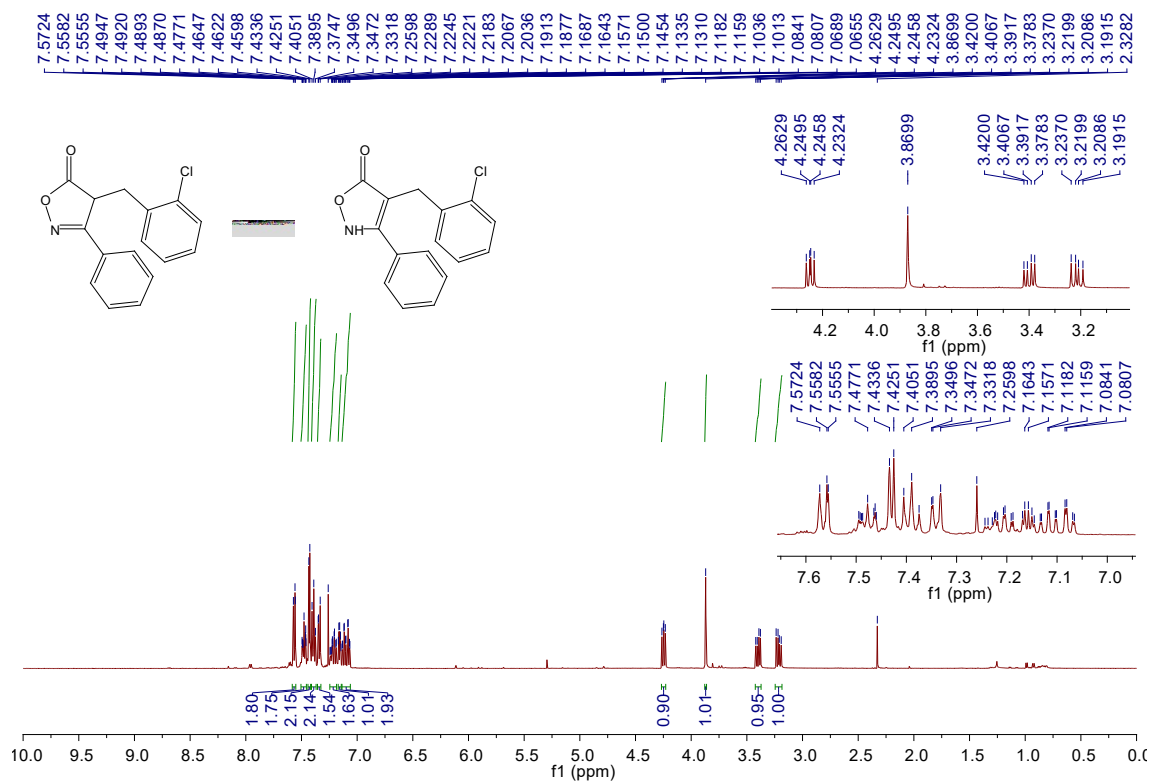

Figure S27.  $^{13}\text{C}$  { $^1\text{H}$ } NMR (125 MHz,  $\text{CDCl}_3$ ) of 4-(2-chlorobenzyl)-3-phenylisoxazol-5(4H)-one

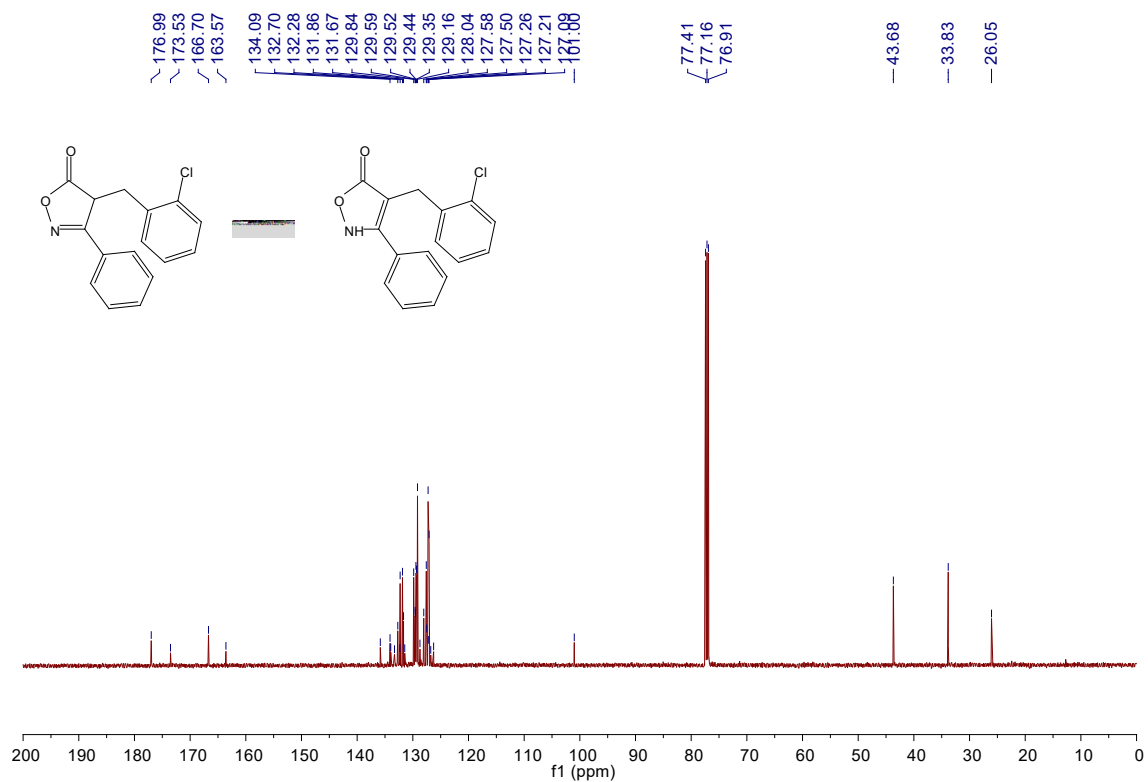

Figure S28. FT-IR (NaCl) of 4-(3-chlorobenzyl)-3-phenylisoxazol-5(4H)-one

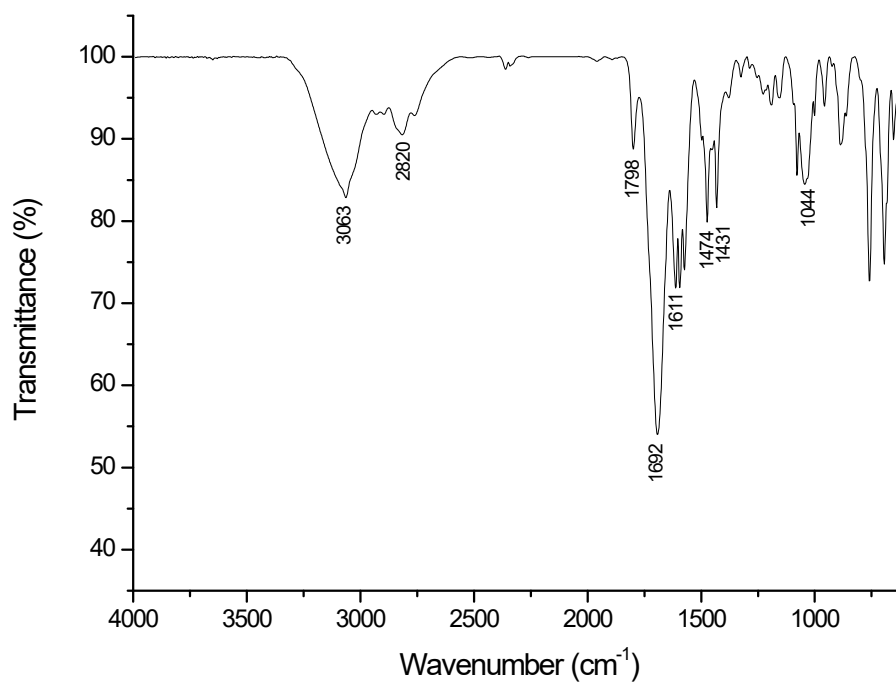



Figure S29.  $^1\text{H}$  NMR (500 MHz,  $\text{CDCl}_3$ ) of 4-(3-chlorobenzyl)-3-phenylisoxazol-5(4H)-one

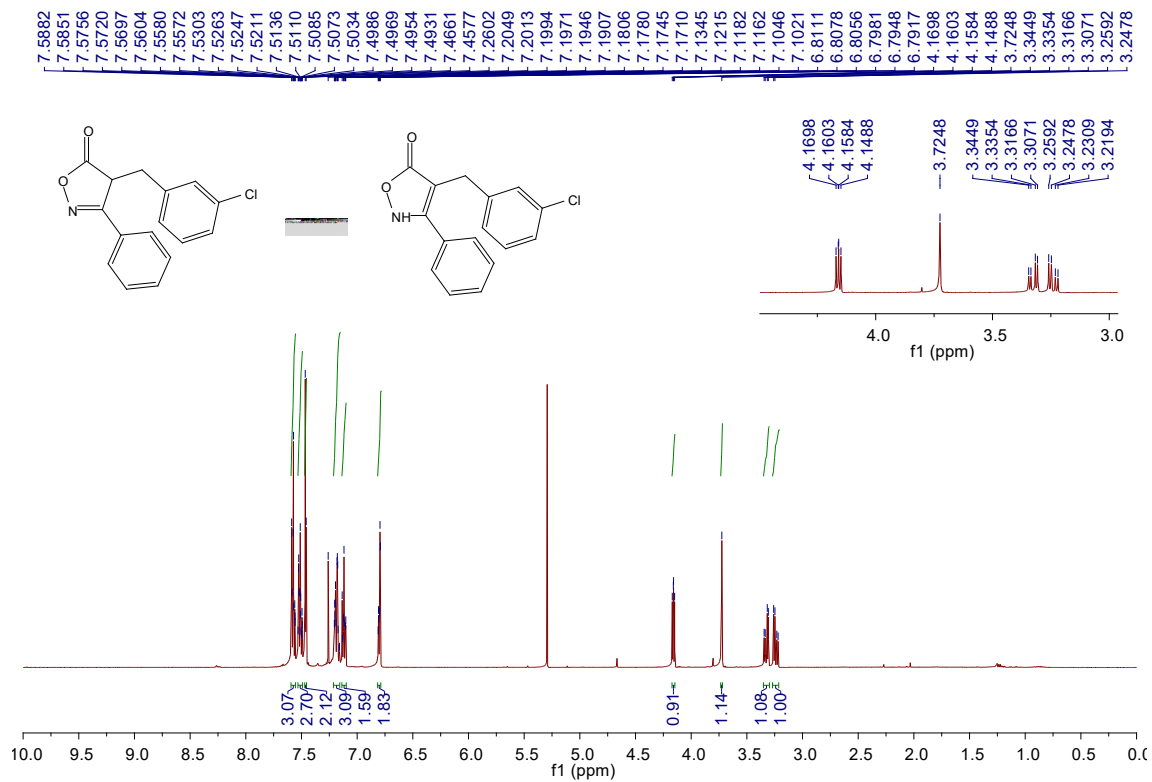

Figure S30.  $^{13}\text{C}$  { $^1\text{H}$ } NMR (125 MHz,  $\text{CDCl}_3$ ) of 4-(3-chlorobenzyl)-3-phenylisoxazol-5(4H)-one

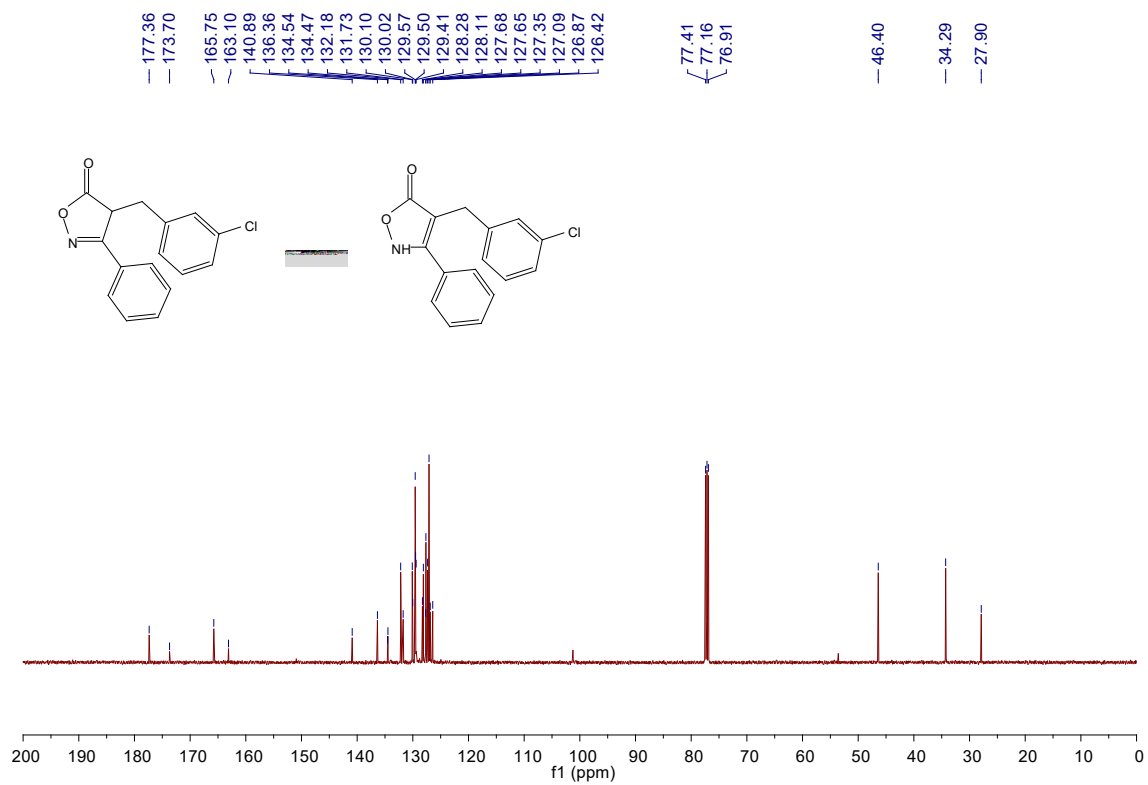

Figure S31. FT-IR (NaCl) of 4-(4-chlorobenzyl)-3-phenylisoxazol-5(4H)-one

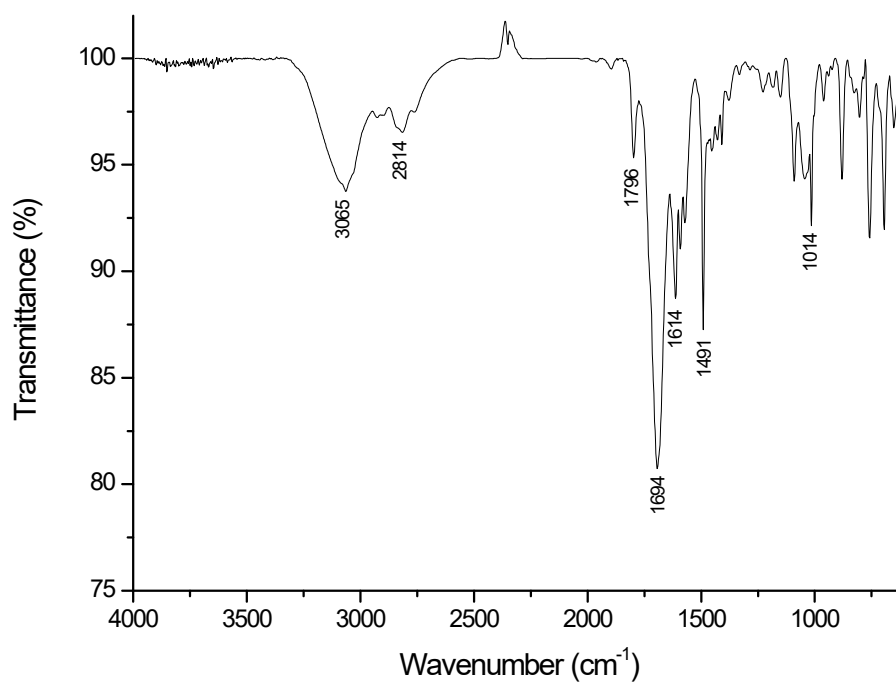

Figure S32. <sup>1</sup>H NMR (500 MHz, CDCl<sub>3</sub>) of 4-(4-chlorobenzyl)-3-phenylisoxazol-5(4H)-one

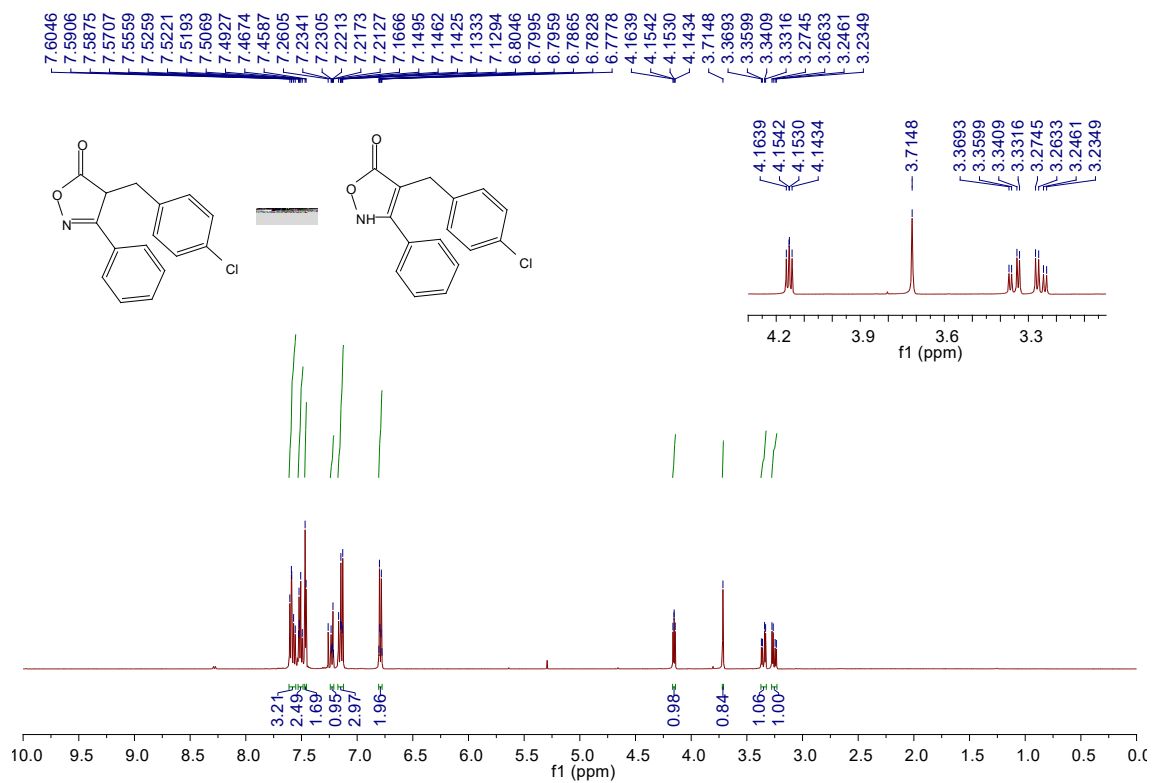

Figure S33.  $^{13}\text{C}$  { $^1\text{H}$ } NMR (125 MHz,  $\text{CDCl}_3$ ) of 4-(4-chlorobenzyl)-3-phenylisoxazol-5(4H)-one

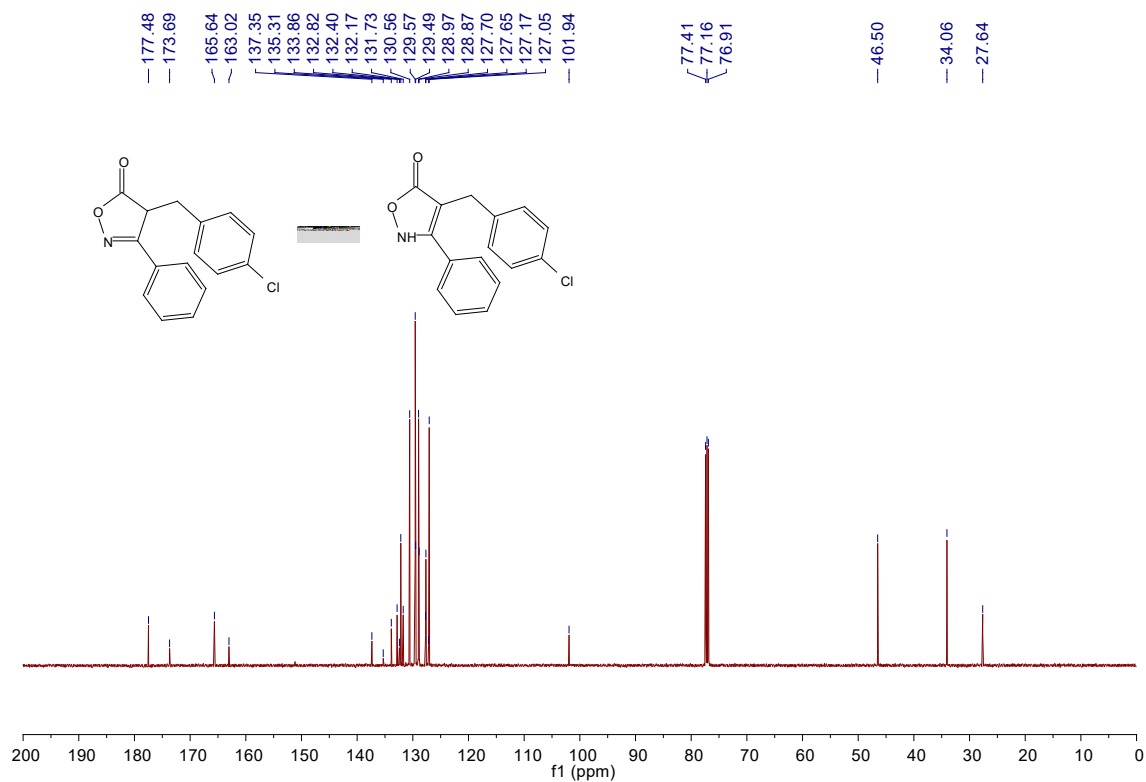

Figure S34. FT-IR (NaCl) of 4-(4-methoxybenzyl)-3-phenylisoxazol-5(4H)-one

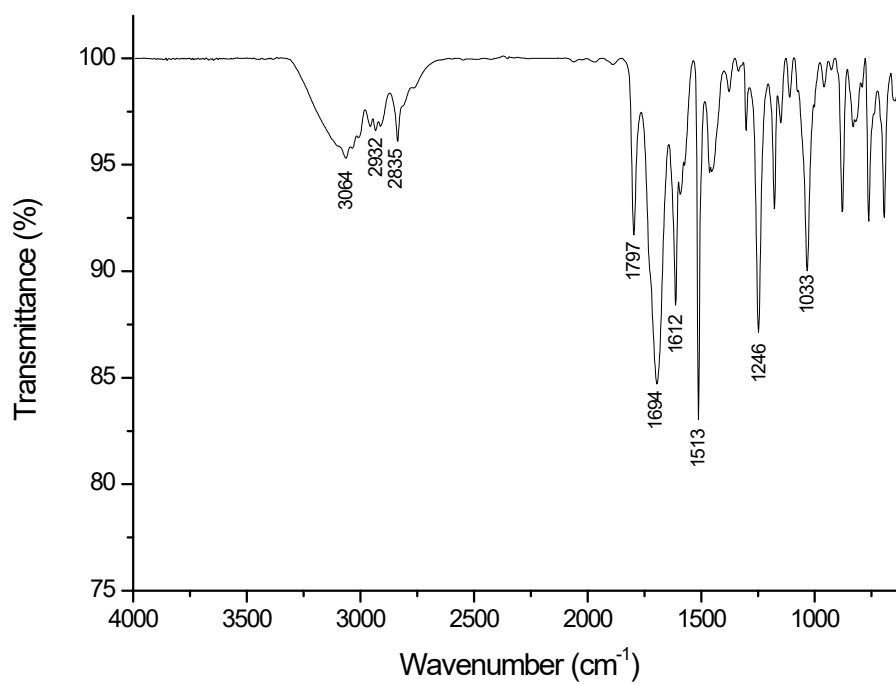

Figure S35.  $^1\text{H}$  NMR (500 MHz,  $\text{CDCl}_3$ ) of 4-(4-methoxybenzyl)-3-phenylisoxazol-5(4H)-one

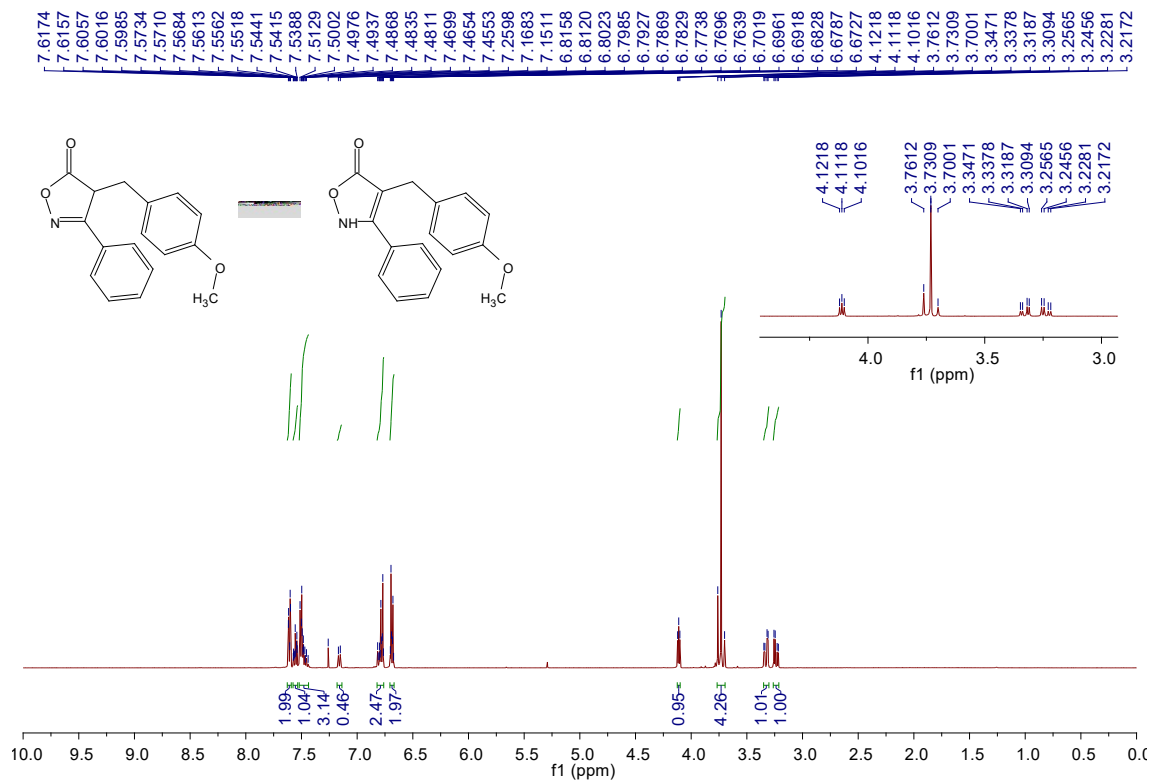

Figure S36.  $^{13}\text{C}$  { $^1\text{H}$ } NMR (125 MHz,  $\text{CDCl}_3$ ) of 4-(4-methoxybenzyl)-3-phenylisoxazol-5(4H)-one

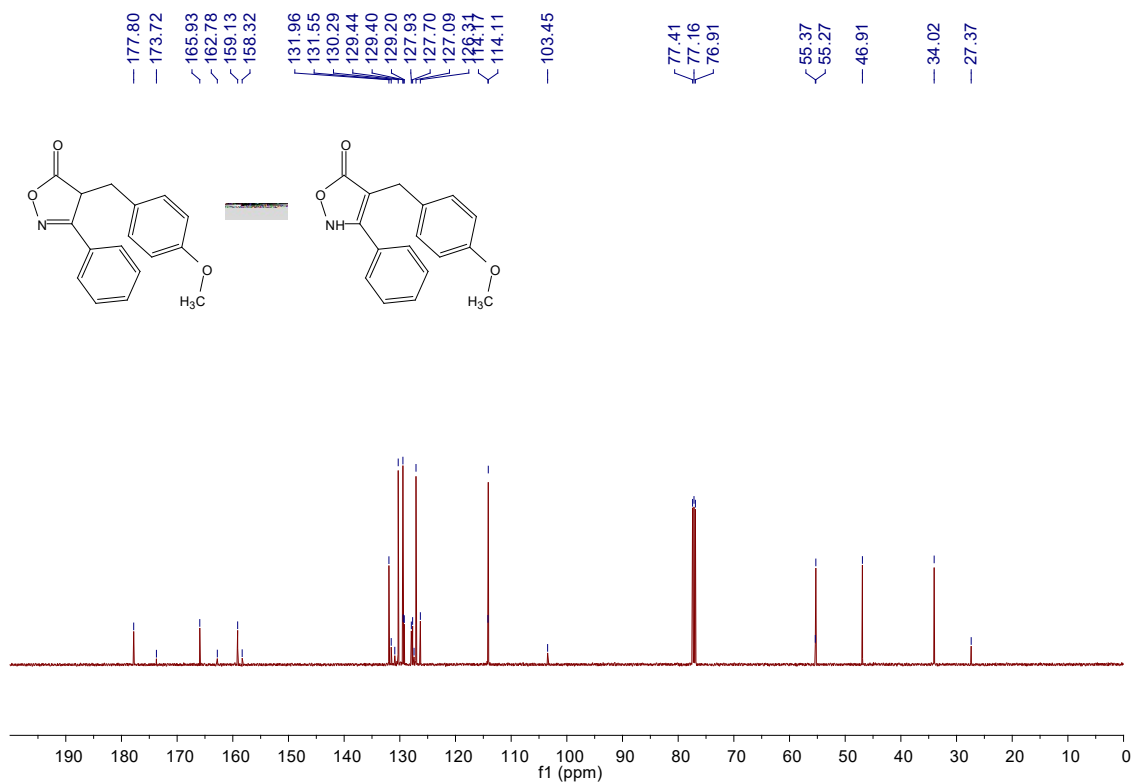

Figure S37. FT-IR (NaCl) of 4-(furan-2-ylmethyl)-3-phenylisoxazol-5(4H)-one

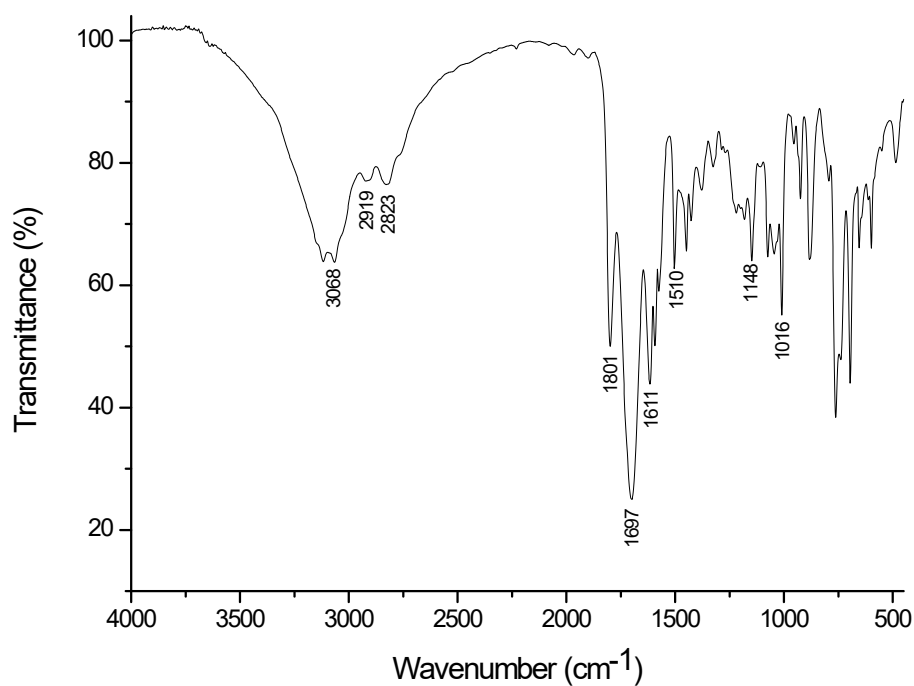

Figure S38. <sup>1</sup>H NMR (500 MHz, CDCl<sub>3</sub>) of 4-(furan-2-ylmethyl)-3-phenylisoxazol-5(4H)-one

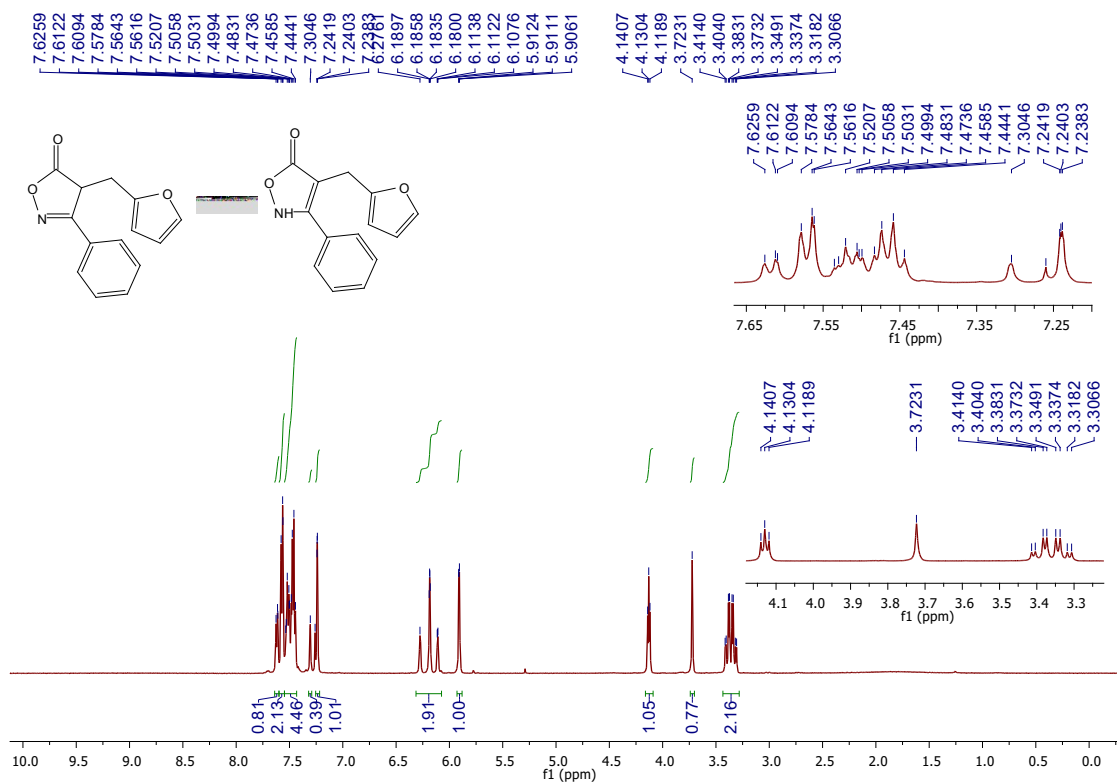

Figure S39.  $^{13}\text{C}$  { $^1\text{H}$ } NMR (125 MHz,  $\text{CDCl}_3$ ) of 4-(furan-2-ylmethyl)-3-phenylisoxazol-5(4H)-one

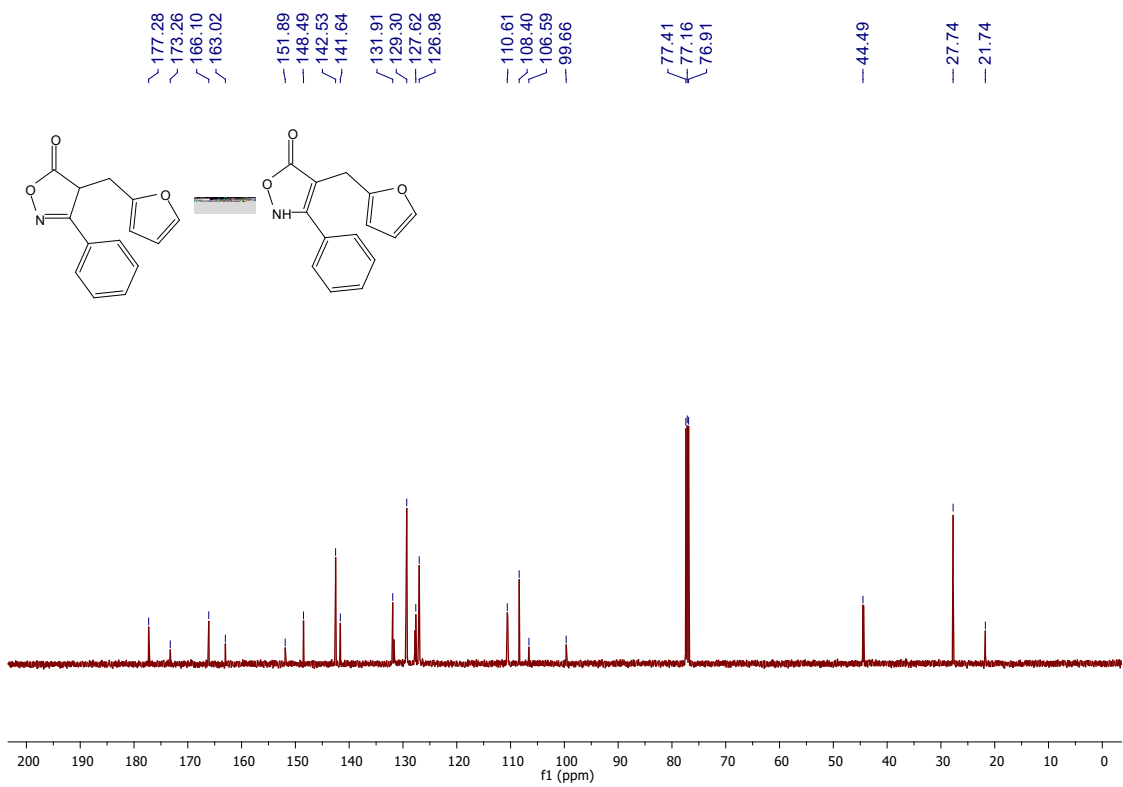

## 2. NMR and IR spectra of compounds 3a-3u and 4a

Figure S40. FT-IR (NaCl) of (*E*)-4-benzyl-2-(3-oxo-1,5-diphenylpent-4-en-1-yl)-3-phenylisoxazol-5(2H)-one (3a).

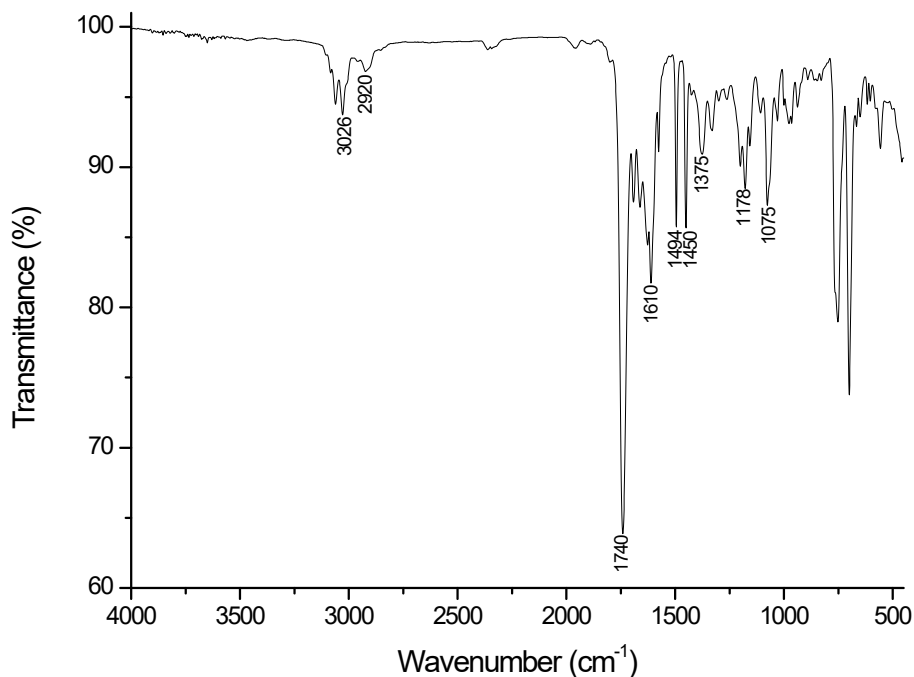

Figure S41. <sup>1</sup>H NMR (500 MHz, CDCl<sub>3</sub>) of (*E*)-4-benzyl-2-(3-oxo-1,5-diphenylpent-4-en-1-yl)-3-phenylisoxazol-5(2H)-one (3a).

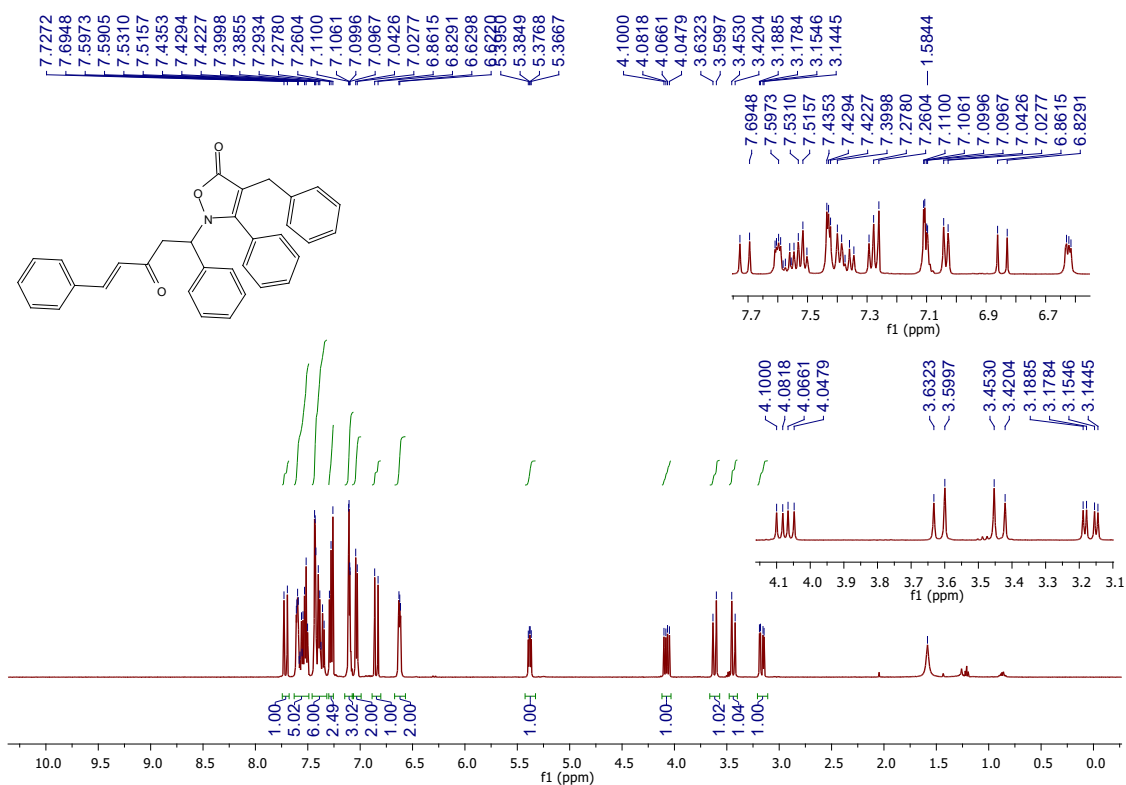

Figure S42.  $^{13}\text{C}$  { $^1\text{H}$ } NMR (125 MHz,  $\text{CDCl}_3$ ) of (*E*)-4-benzyl-2-(3-oxo-1,5-diphenylpent-4-en-1-yl)-3-phenylisoxazol-5(2H)-one (3a).

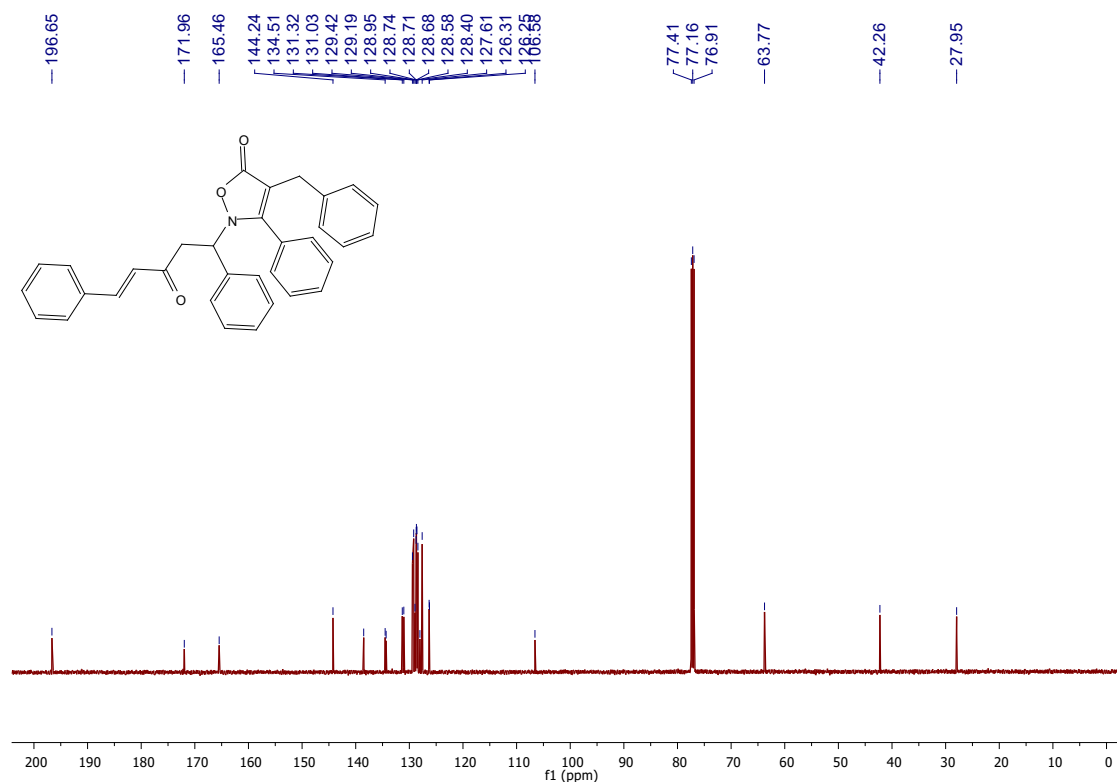

Figure S43. FT-IR (NaCl) of (*E*)-4-(4-methoxybenzyl)-2-(3-oxo-1,5-diphenylpent-4-en-1-yl)-3-phenylisoxazol-5(2H)-one (3b).

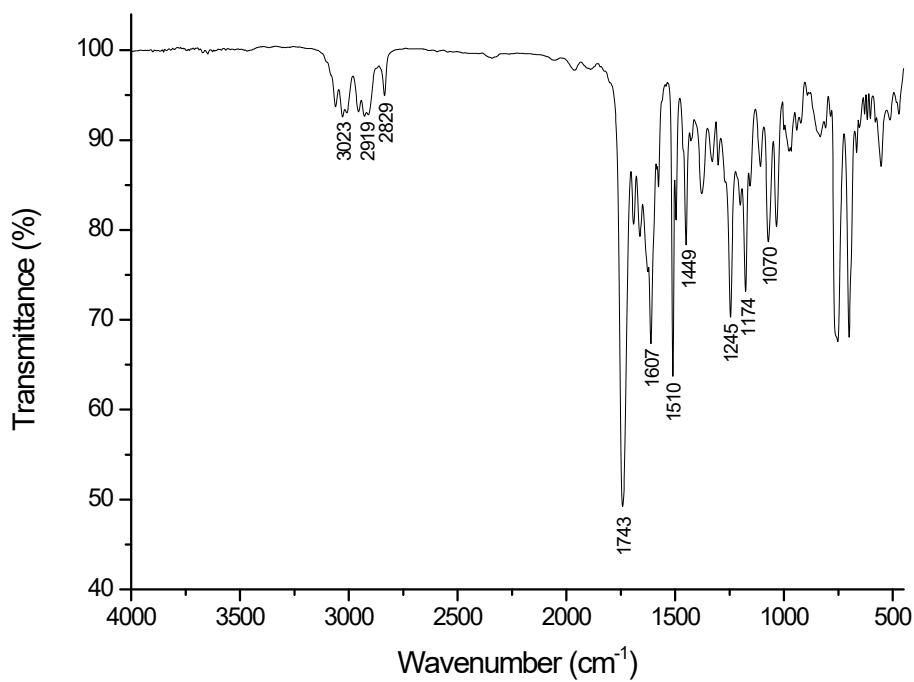





Figure S46. FT-IR (NaCl) of (*E*)-4-(4-chlorobenzyl)-2-(3-oxo-1,5-diphenylpent-4-en-1-yl)-3-phenylisoxazol-5(2H)-one (3c).

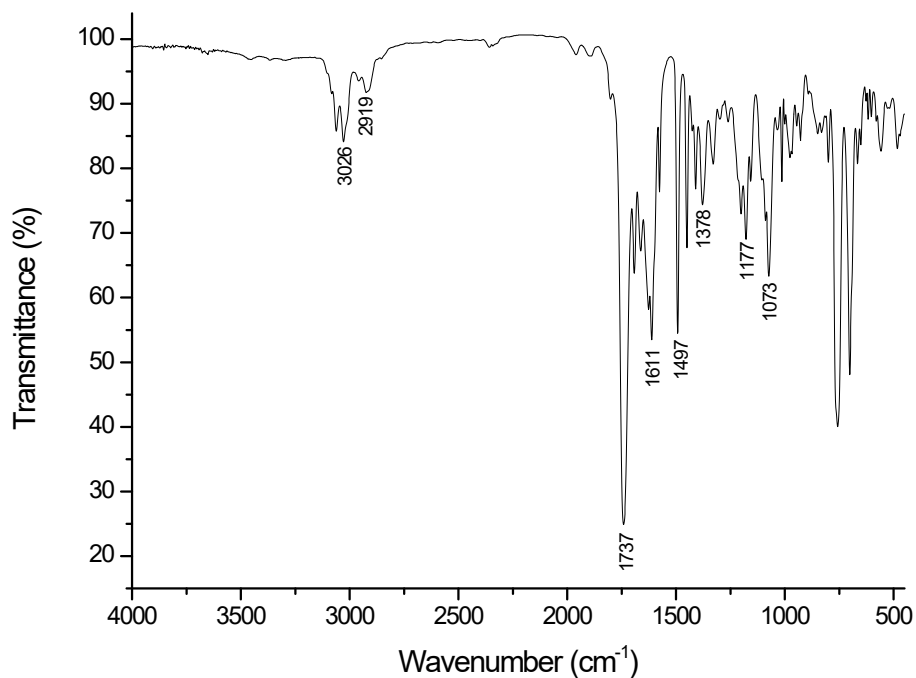

Figure

S47. <sup>1</sup>H NMR (500 MHz, CDCl<sub>3</sub>) of (*E*)-4-(4-chlorobenzyl)-2-(3-oxo-1,5-diphenylpent-4-en-1-yl)-3-phenylisoxazol-5(2H)-one (3c).

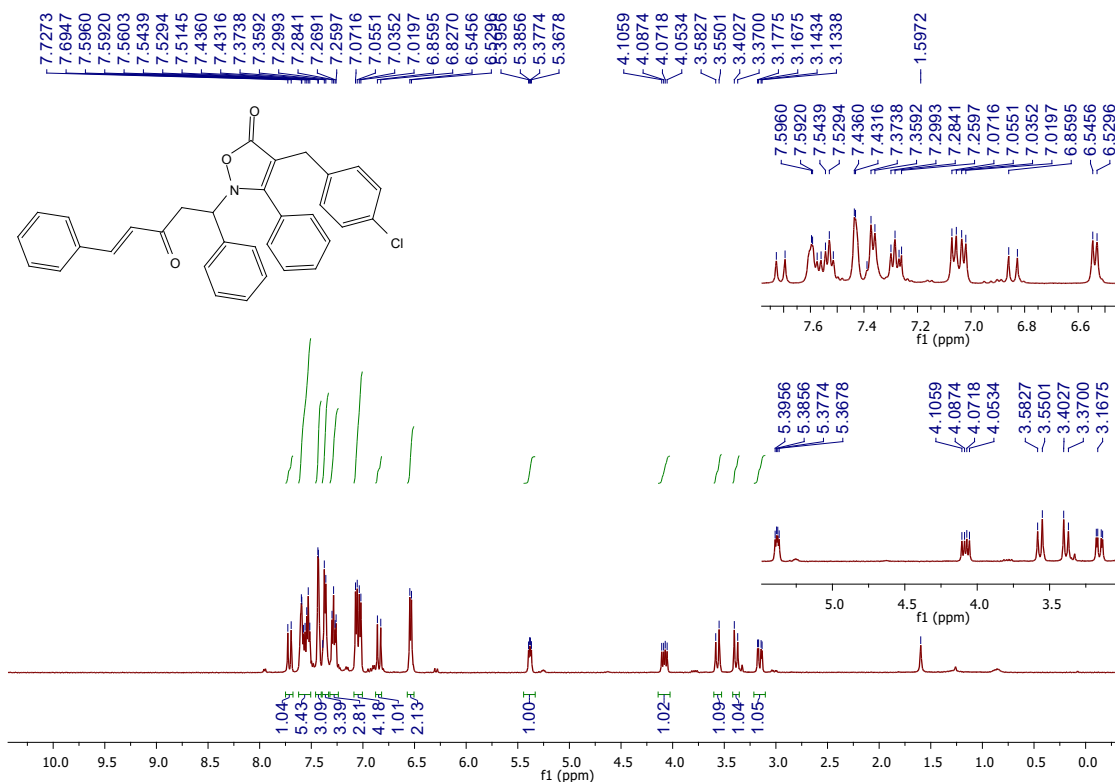

Figure S48.  $^{13}\text{C}$  { $^1\text{H}$ } NMR (125 MHz,  $\text{CDCl}_3$ ) of (*E*)-4-(4-chlorobenzyl)-2-(3-oxo-1,5-diphenylpent-4-en-1-yl)-3-phenylisoxazol-5(2H)-one (3c).

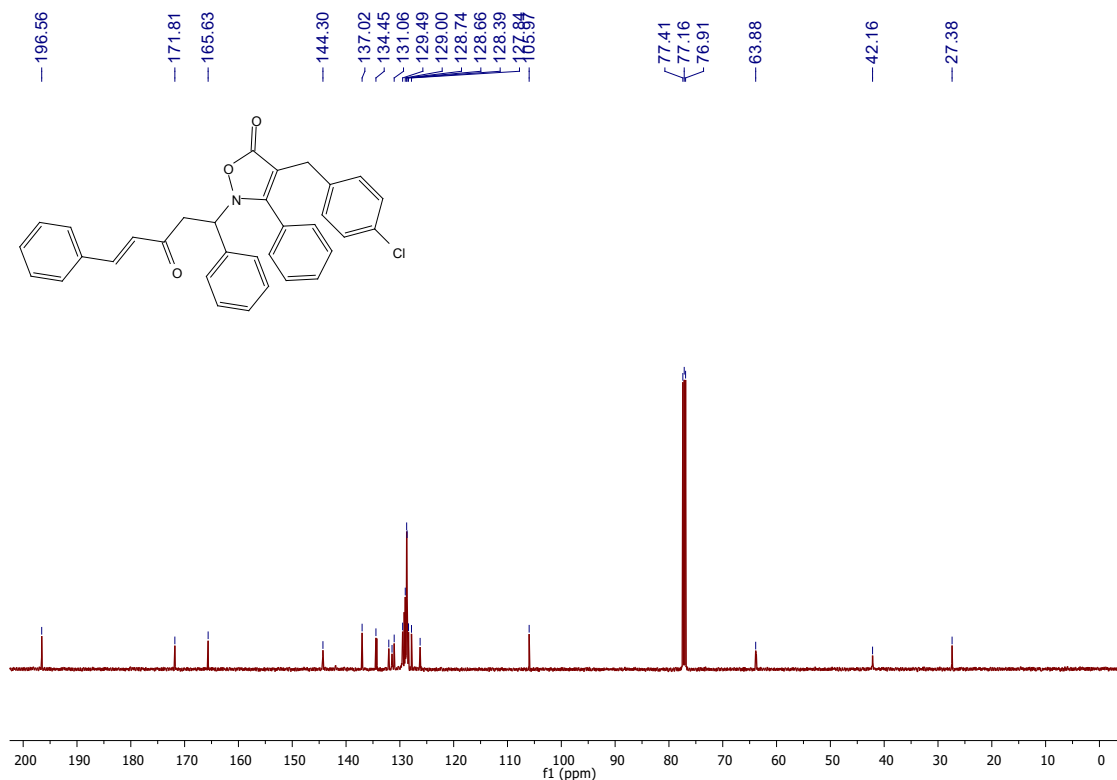

Figure S49. FT-IR (NaCl) of (*E*)-4-(3-chlorobenzyl)-2-(3-oxo-1,5-diphenylpent-4-en-1-yl)-3-phenylisoxazol-5(2H)-one (3d).

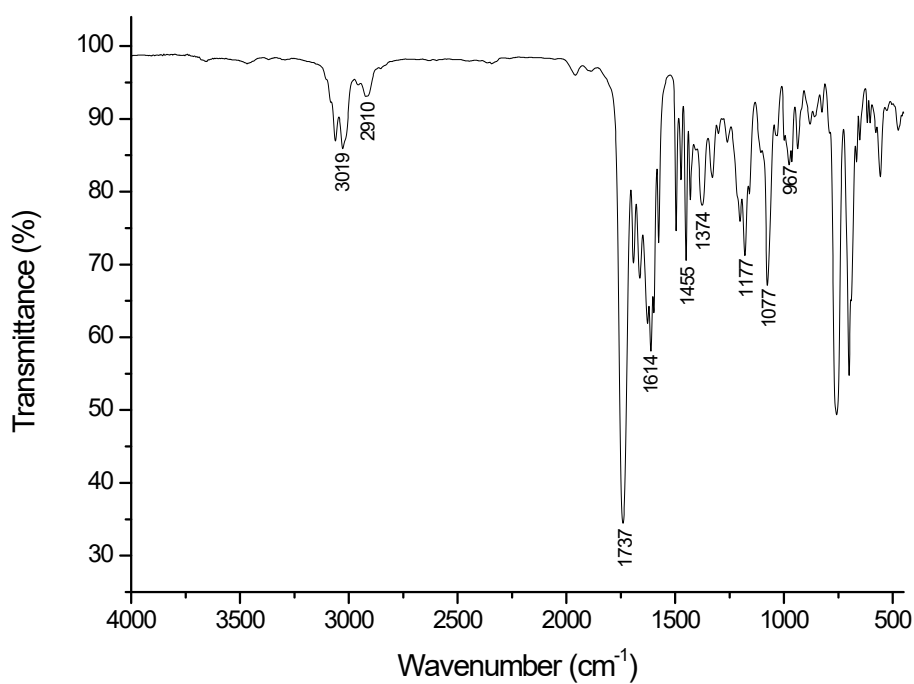

Figure S50.  $^1\text{H}$  NMR (500 MHz,  $\text{CDCl}_3$ ) of (*E*)-4-(3-chlorobenzyl)-2-(3-oxo-1,5-diphenylpent-4-en-1-yl)-3-phenylisoxazol-5(2H)-one (3d).

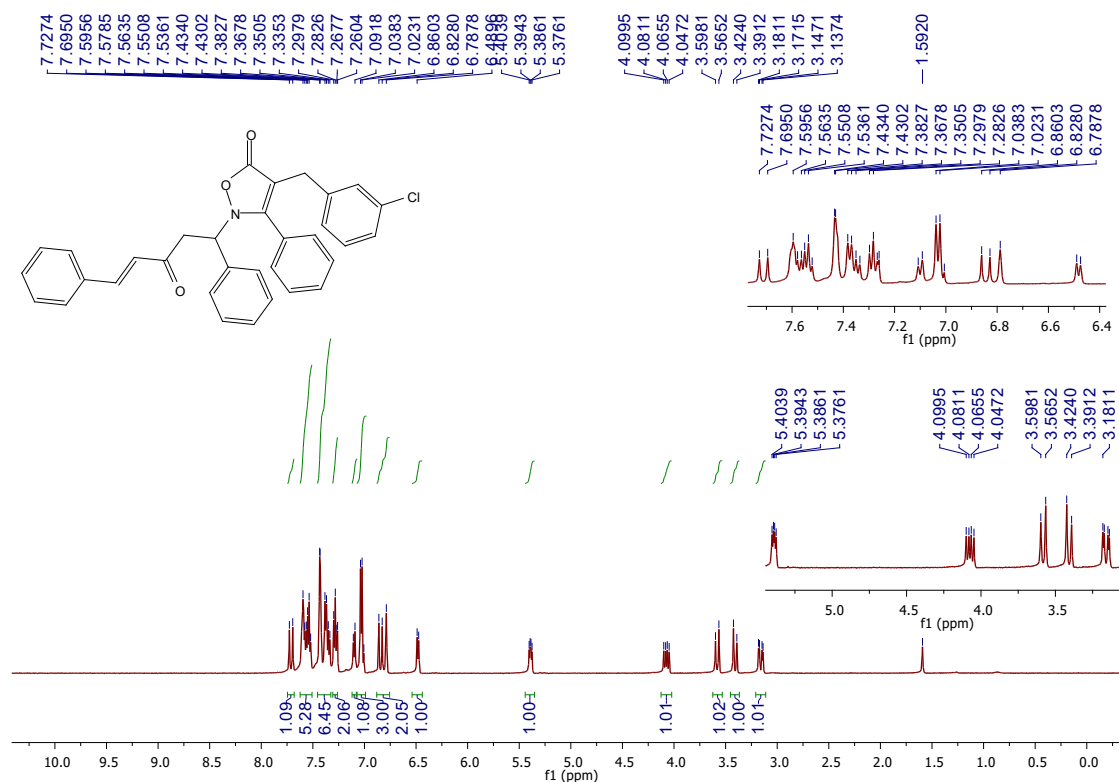

Figure S51.  $^{13}\text{C}$  { $^1\text{H}$ } NMR (125 MHz,  $\text{CDCl}_3$ ) of (*E*)-4-(3-chlorobenzyl)-2-(3-oxo-1,5-diphenylpent-4-en-1-yl)-3-phenylisoxazol-5(2H)-one (3d).

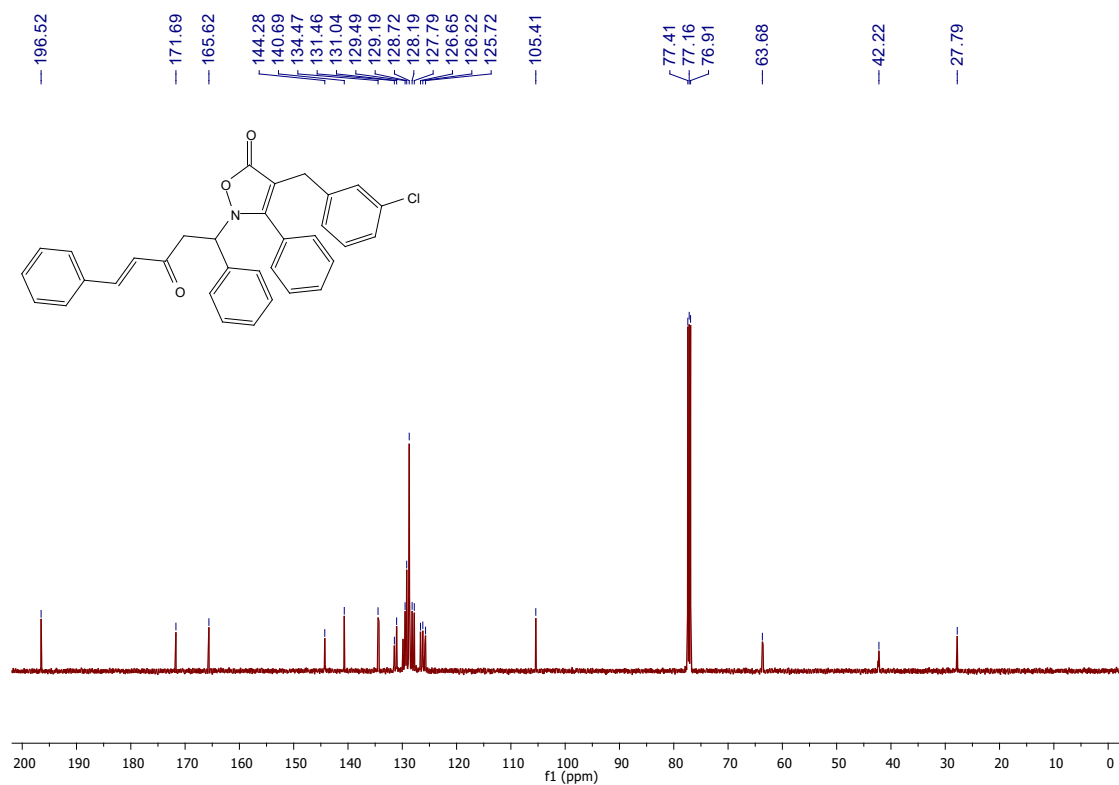

Figure S52. FT-IR (NaCl) of *(E)*-4-(2-chlorobenzyl)-2-(3-oxo-1,5-diphenylpent-4-en-1-yl)-3-phenylisoxazol-5(2H)-one (3e).

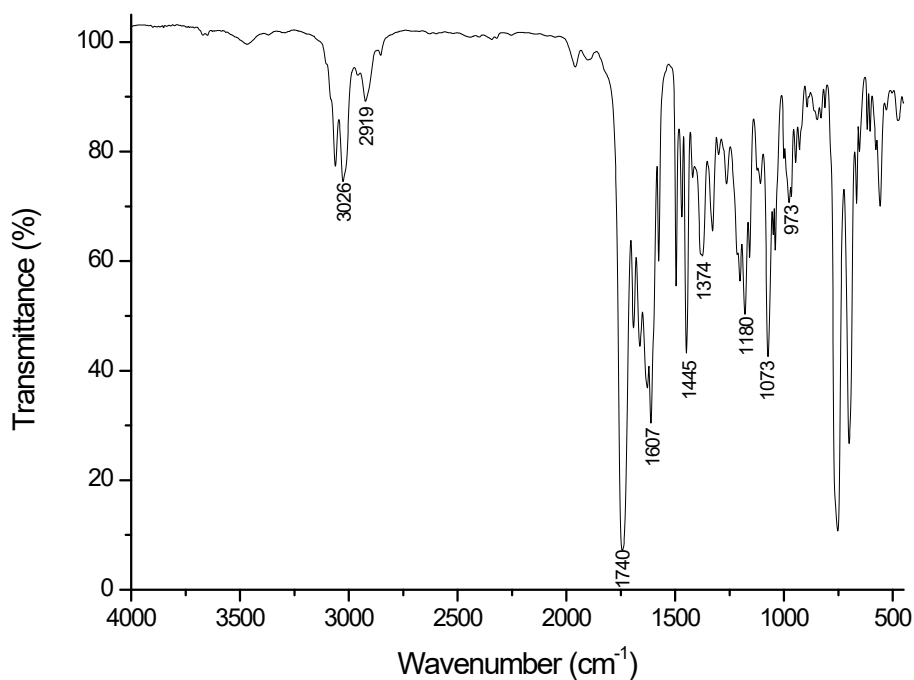

Figure S53. <sup>1</sup>H NMR (500 MHz, CDCl<sub>3</sub>) of *(E)*-4-(2-chlorobenzyl)-2-(3-oxo-1,5-diphenylpent-4-en-1-yl)-3-phenylisoxazol-5(2H)-one (3e).

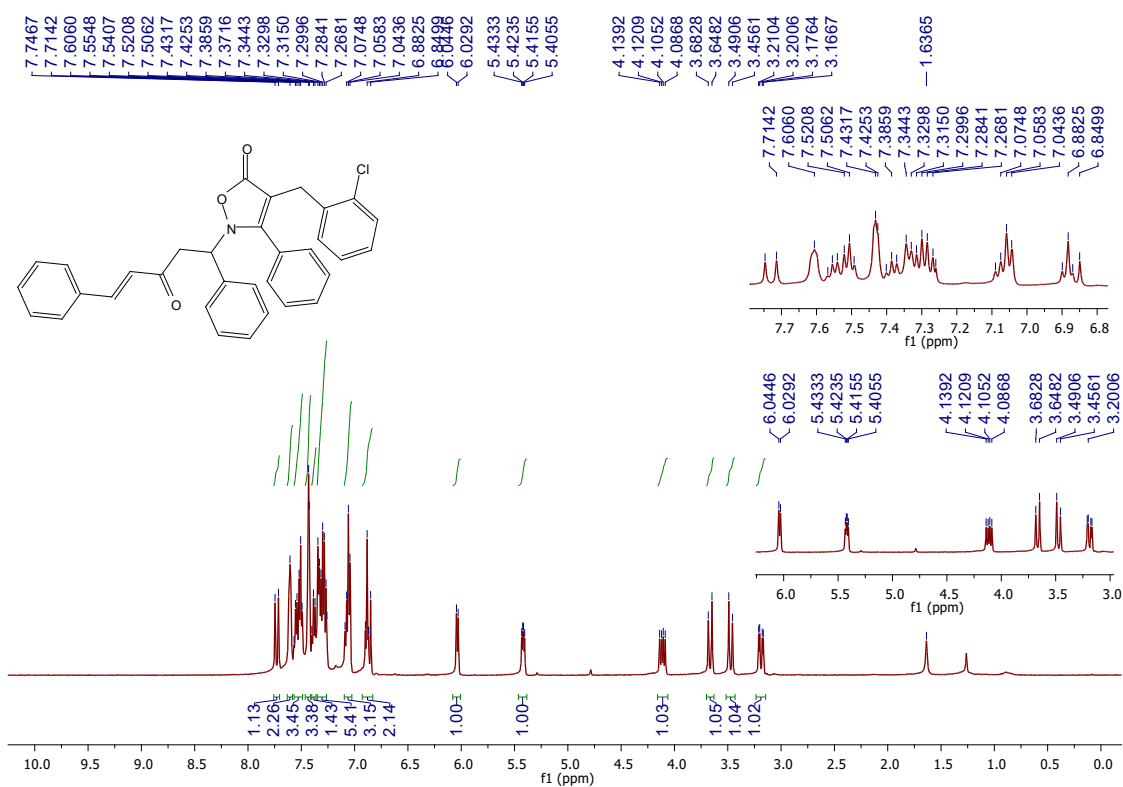

Figure S54.  $^{13}\text{C}$  { $^1\text{H}$ } NMR (125 MHz,  $\text{CDCl}_3$ ) of (*E*)-4-(2-chlorobenzyl)-2-(3-oxo-1,5-diphenylpent-4-en-1-yl)-3-phenylisoxazol-5(2H)-one (3e).

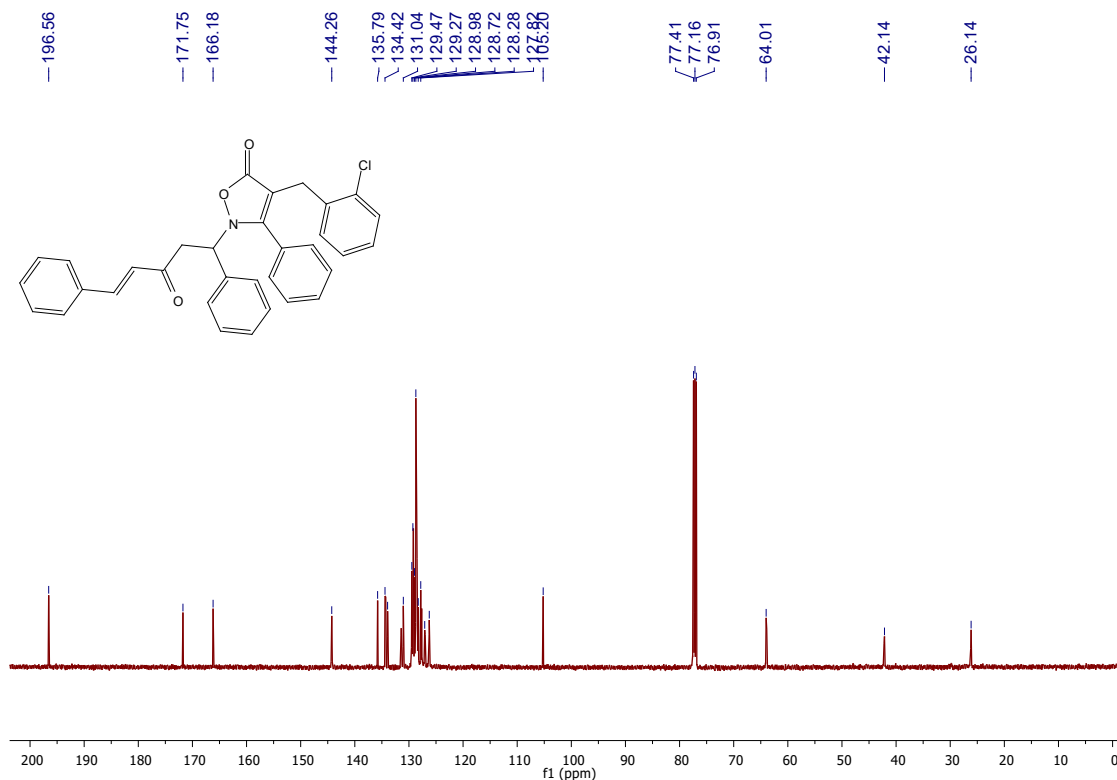

Figure S55. FT-IR (NaCl) of (*E*)-4-benzyl-2-(1,5-bis(4-methoxyphenyl)-3-oxopent-4-en-1-yl)-3-phenylisoxazol-5(2H)-one (3f).

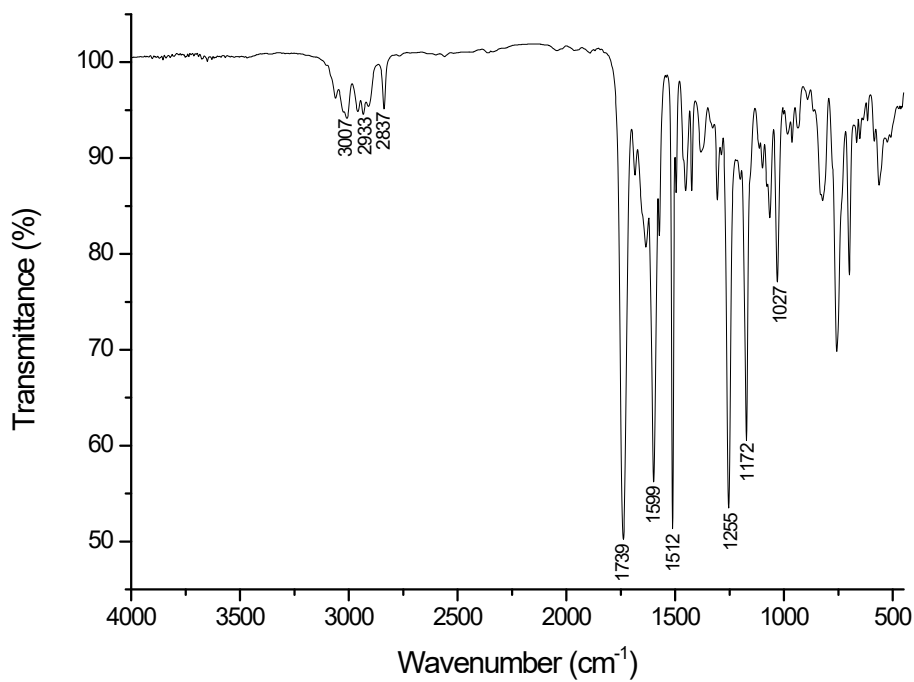

Figure S56.  $^1\text{H}$  NMR (500 MHz,  $\text{CDCl}_3$ ) of (*E*)-4-benzyl-2-(1,5-bis(4-methoxyphenyl)-3-oxopent-4-en-1-yl)-3-phenylisoxazol-5(2H)-one (3f).

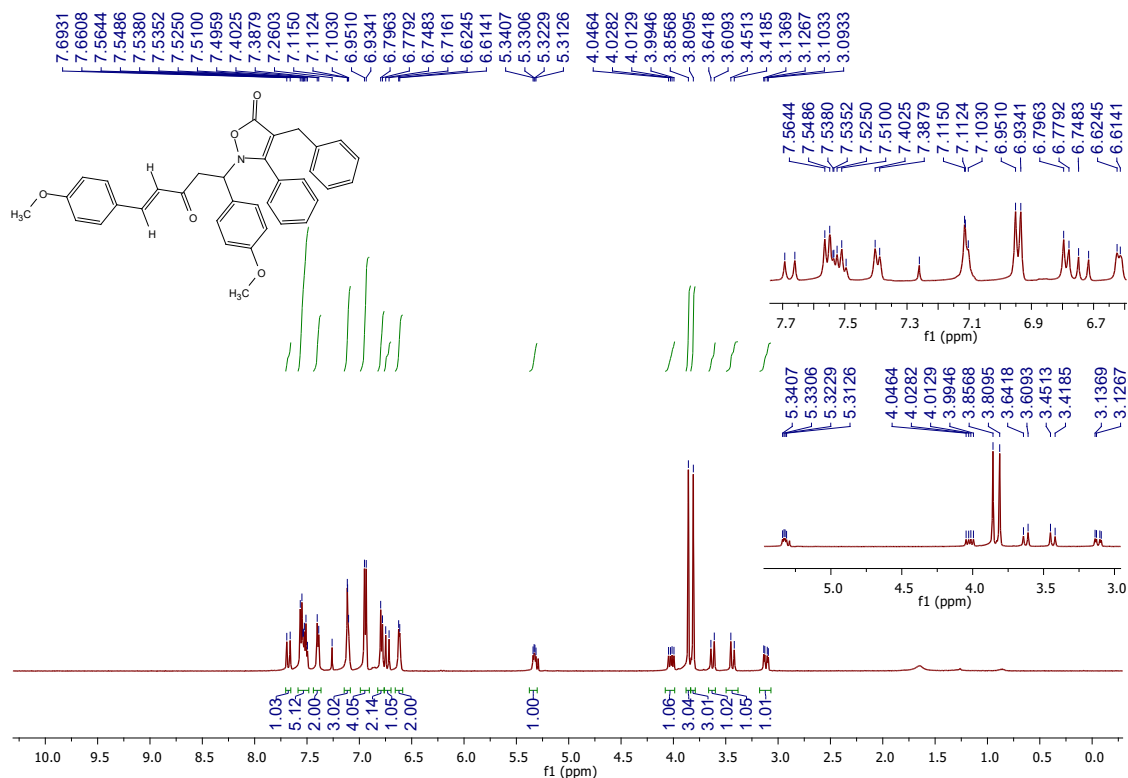

Figure S57.  $^{13}\text{C}$  { $^1\text{H}$ } NMR (125 MHz,  $\text{CDCl}_3$ ) of (*E*)-4-benzyl-2-(1,5-bis(4-methoxyphenyl)-3-oxopent-4-en-1-yl)-3-phenylisoxazol-5(2H)-one (3f).

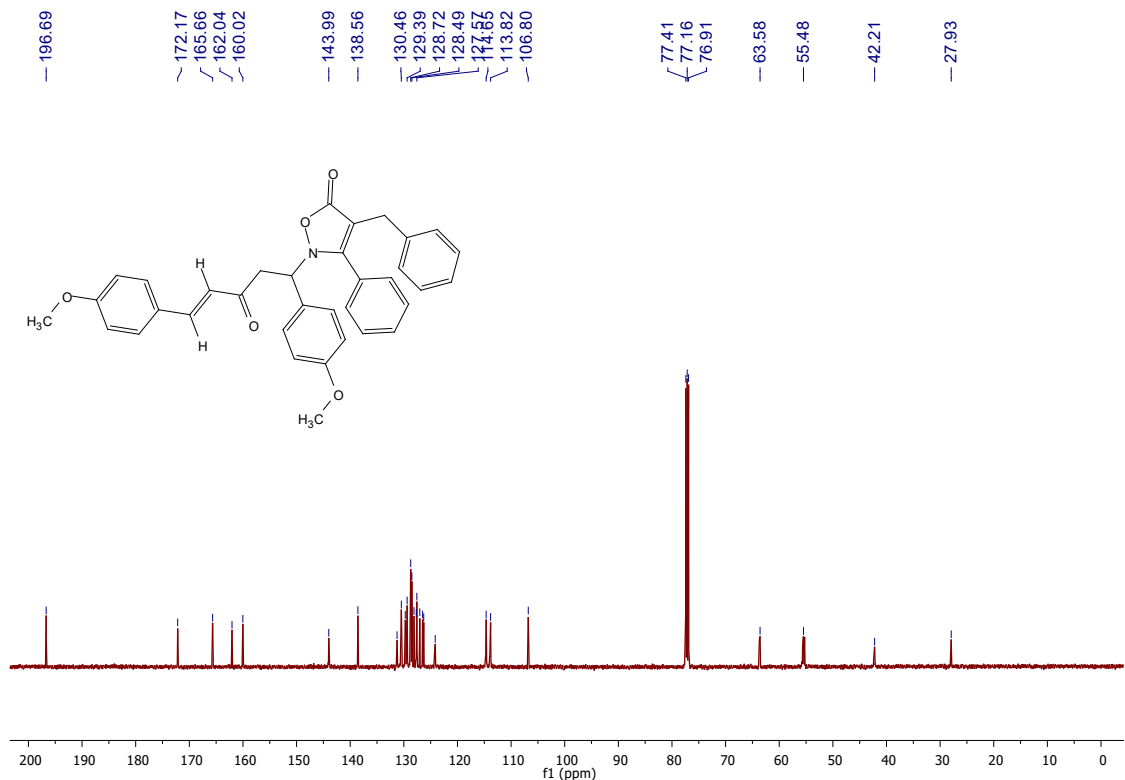

Figure S58. FT-IR (NaCl) of (*E*)-4-benzyl-2-(3-oxo-1,5-di-*p*-tolylpent-4-en-1-yl)-3-phenylisoxazol-5(2H)-one (3g).

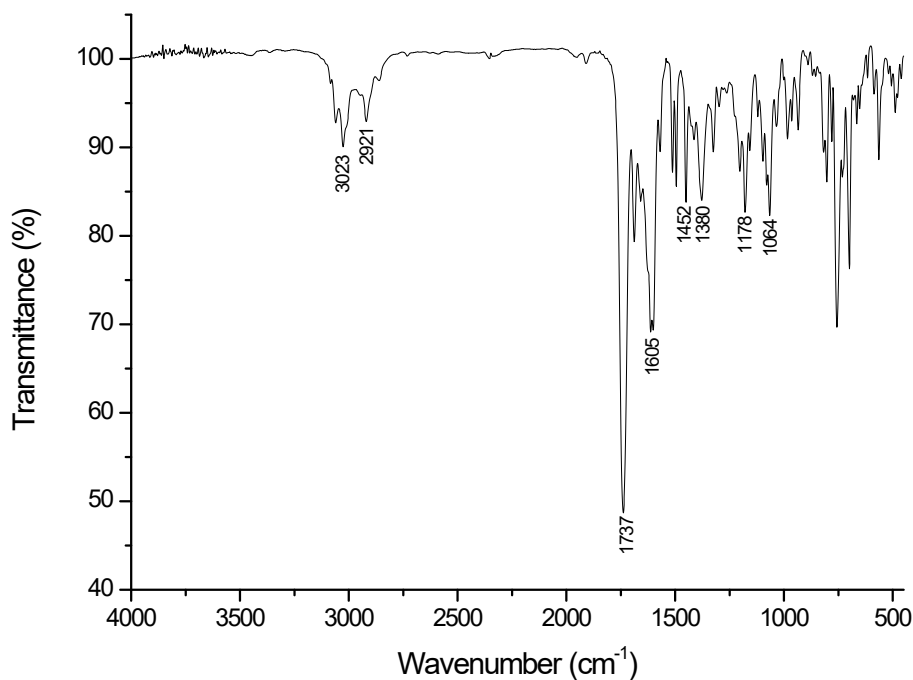

Figure S59. <sup>1</sup>H NMR (500 MHz, CDCl<sub>3</sub>) of (*E*)-4-benzyl-2-(3-oxo-1,5-di-*p*-tolylpent-4-en-1-yl)-3-phenylisoxazol-5(2H)-one (3g).

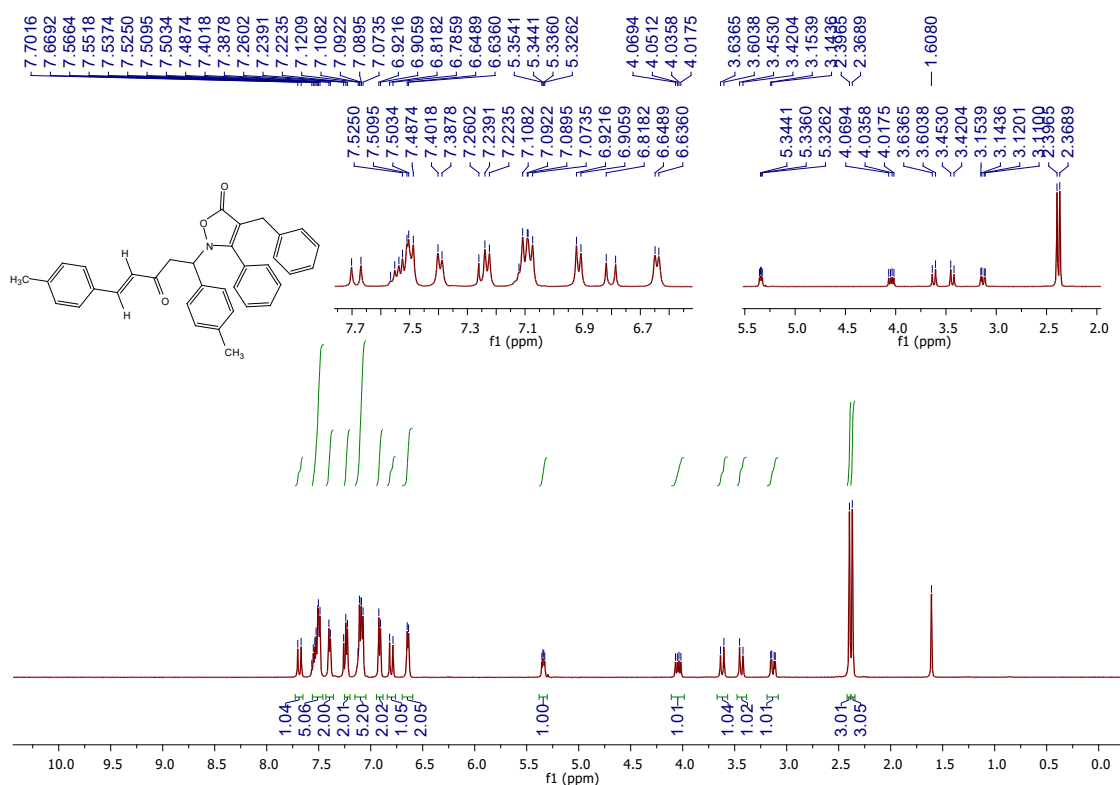



Figure S60.  $^{13}\text{C}$  { $^1\text{H}$ } NMR (125 MHz,  $\text{CDCl}_3$ ) of (*E*)-4-benzyl-2-(3-oxo-1,5-di-*p*-tolylpent-4-en-1-yl)-3-phenylisoxazol-5(2*H*)-one (3g).

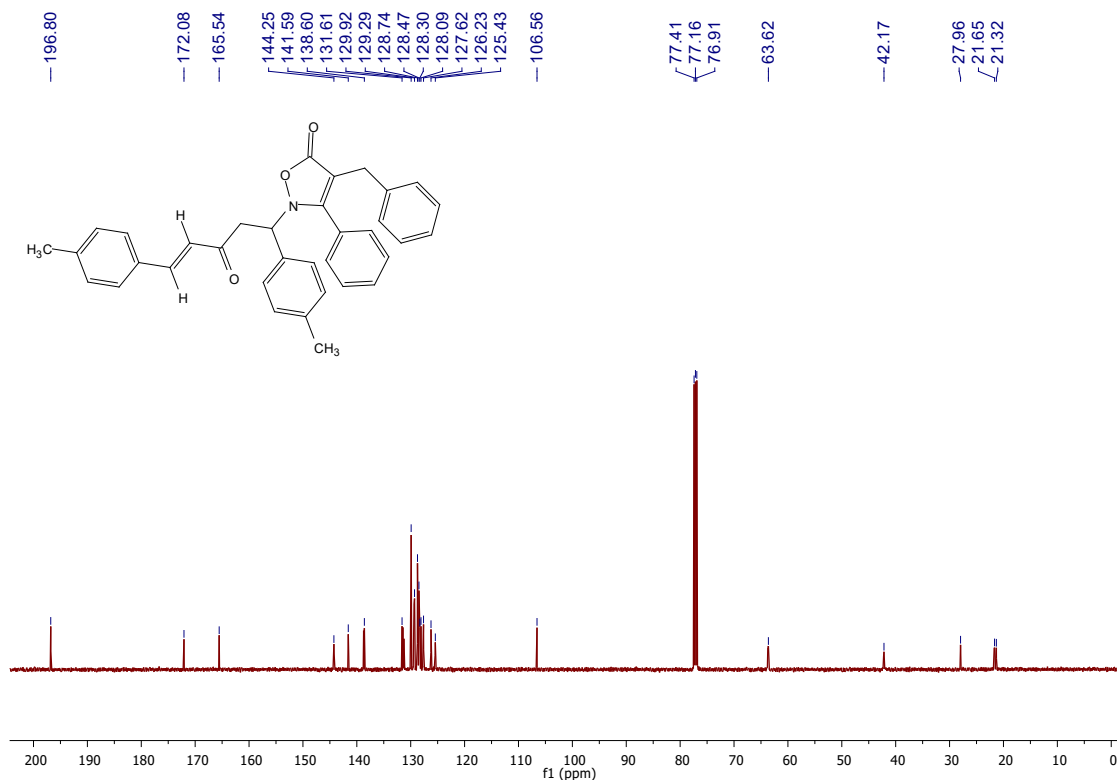

Figure S61. IR (ATR) of (*E*)-4-benzyl-2-(1,5-bis(4-chlorophenyl)-3-oxopent-4-en-1-yl)-3-phenylisoxazol-5(2*H*)-one (3h).

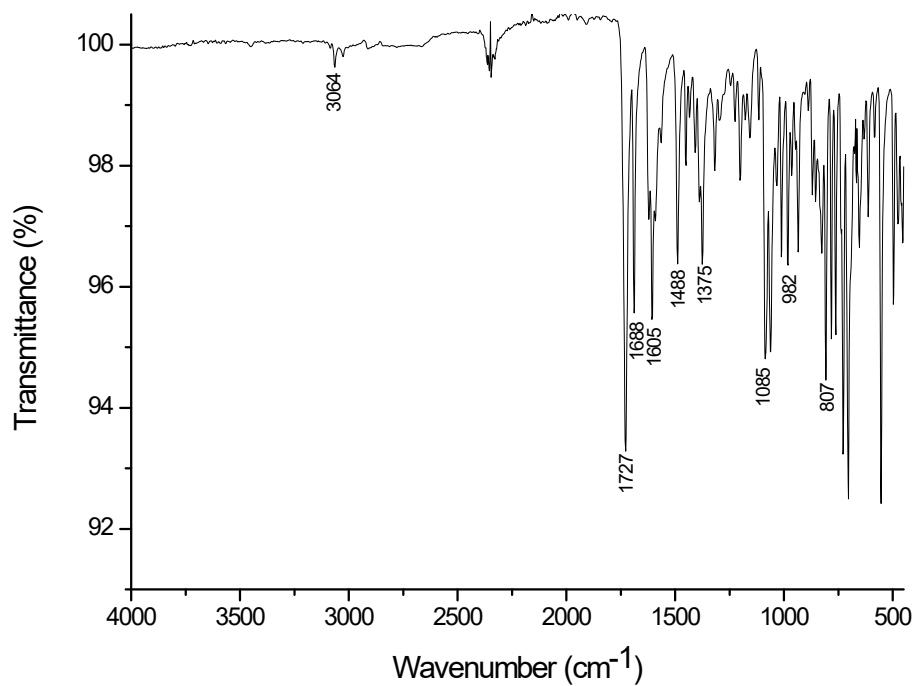

Figure S62.  $^1\text{H}$  NMR (500 MHz,  $\text{CDCl}_3$ ) of (*E*)-4-benzyl-2-(1,5-bis(4-chlorophenyl)-3-oxopent-4-en-1-yl)-3-phenylisoxazol-5(2H)-one (3h).

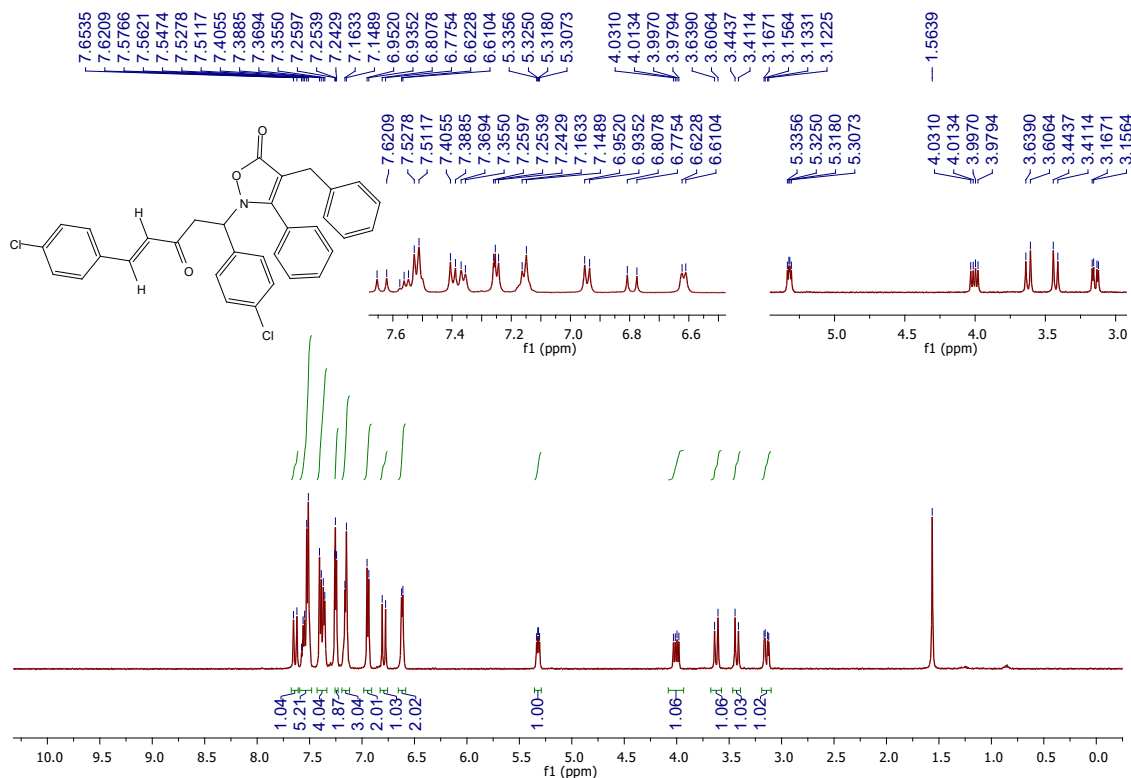

Figure S63.  $^{13}\text{C}$  { $^1\text{H}$ } NMR (125 MHz,  $\text{CDCl}_3$ ) of (*E*)-4-benzyl-2-(1,5-bis(4-chlorophenyl)-3-oxopent-4-en-1-yl)-3-phenylisoxazol-5(2H)-one (3h).

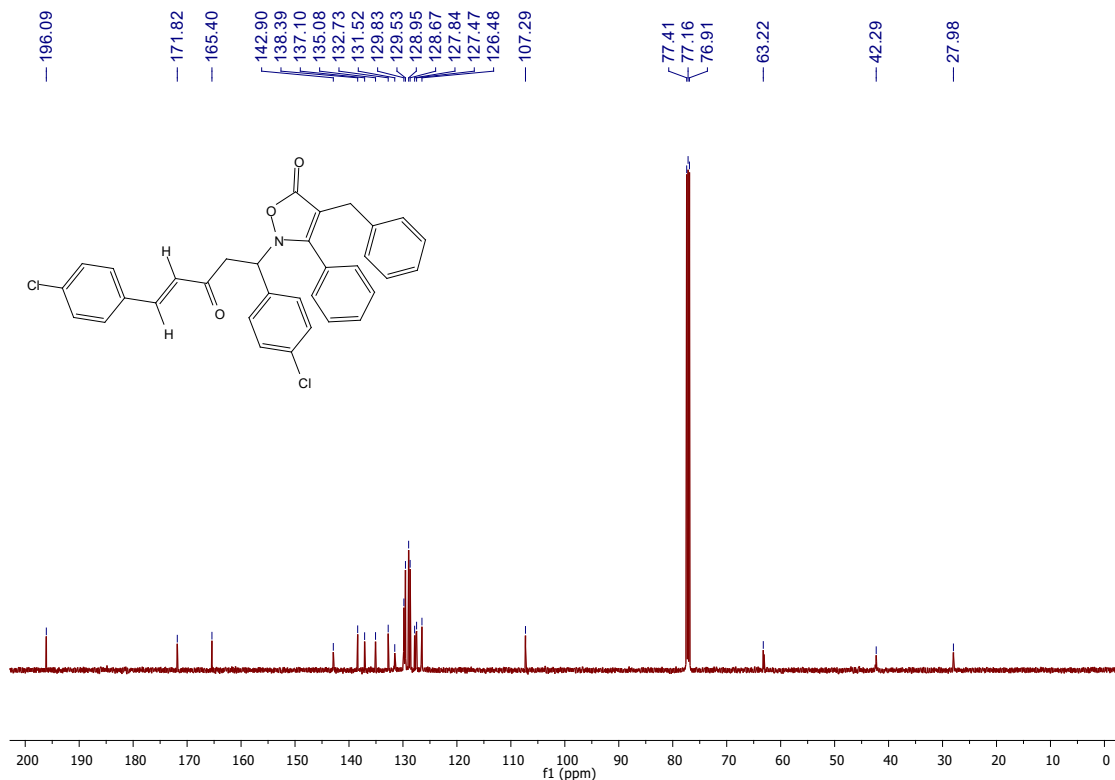

Figure S64. FT-IR (NaCl) of (*E*)-2-(1,5-bis(4-methoxyphenyl)-3-oxopent-4-en-1-yl)-4-(4-chlorobenzyl)-3-phenylisoxazol-5(2H)-one (3i).

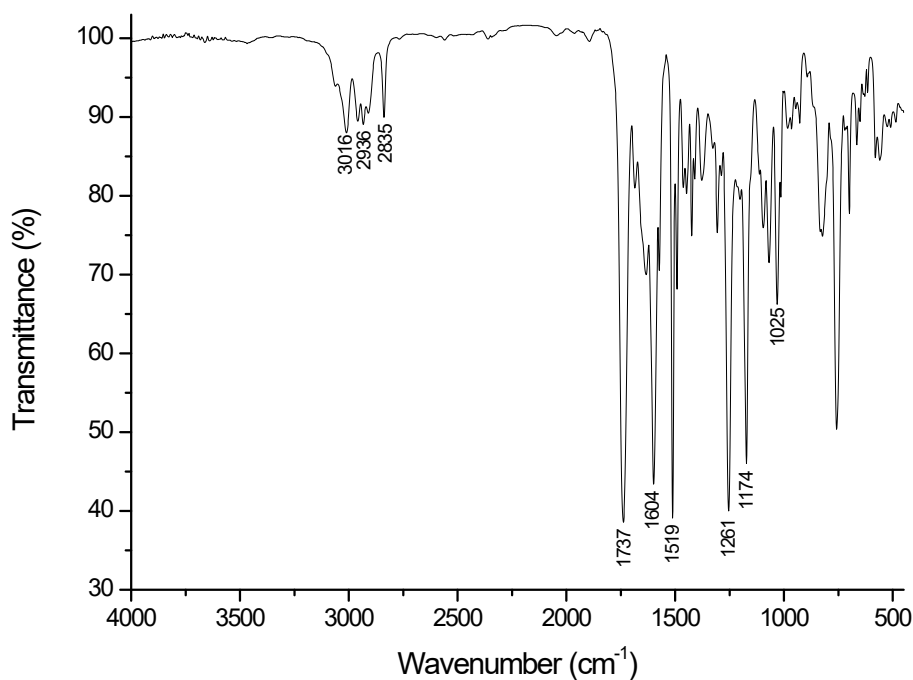

Figure S65. <sup>1</sup>H NMR (500 MHz, CDCl<sub>3</sub>) of (*E*)-2-(1,5-bis(4-methoxyphenyl)-3-oxopent-4-en-1-yl)-4-(4-chlorobenzyl)-3-phenylisoxazol-5(2H)-one (3i).

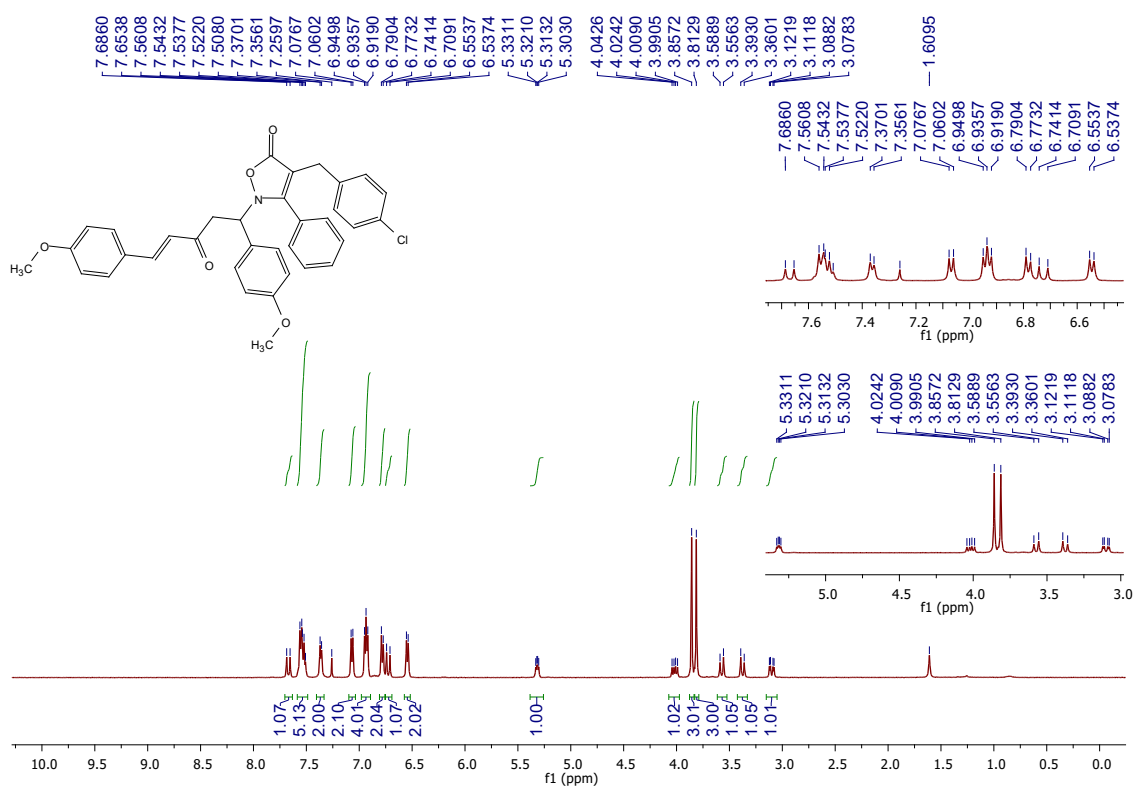

Figure S66.  $^{13}\text{C}$  { $^1\text{H}$ } NMR (125 MHz,  $\text{CDCl}_3$ ) of (*E*)-2-(1,5-bis(4-methoxyphenyl)-3-oxopent-4-en-1-yl)-4-(4-chlorobenzyl)-3-phenylisoxazol-5(2H)-one (3i).

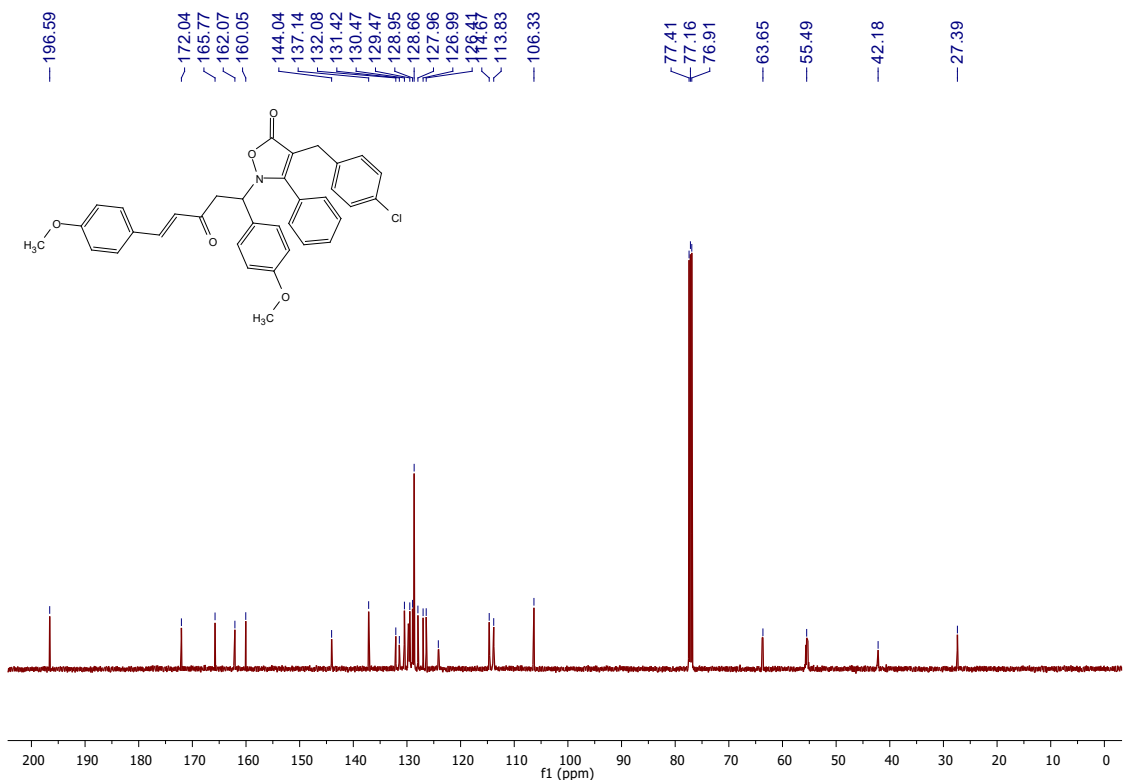

Figure S67. IR (ATR) of (*E*)-4-(4-chlorobenzyl)-2-(3-oxo-1,5-di-*p*-tolylpent-4-en-1-yl)-3-phenylisoxazol-5(2H)-one (3j).

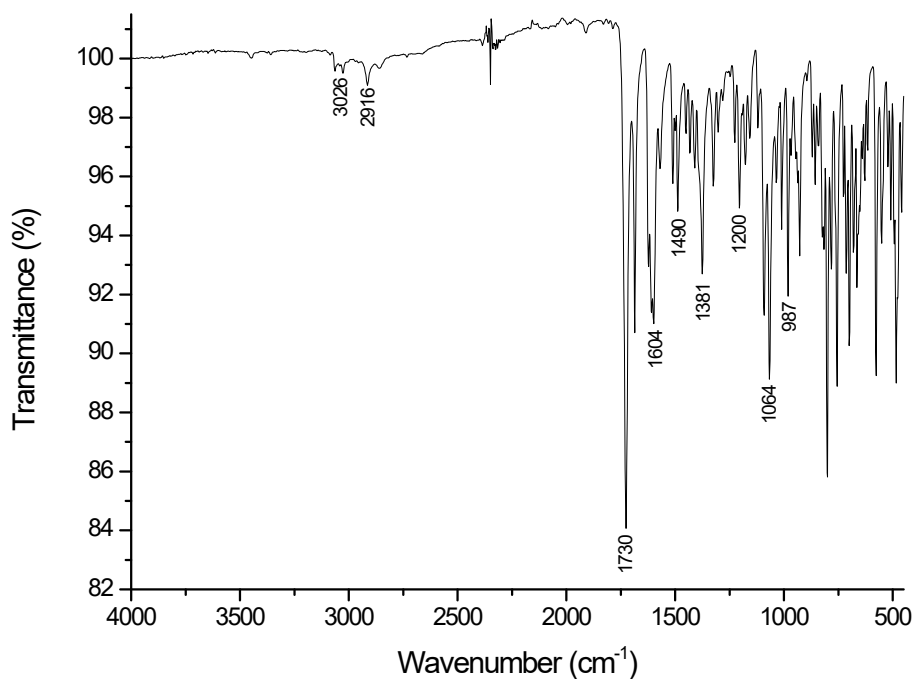

Figure S68.  $^1\text{H}$  NMR (500 MHz,  $\text{CDCl}_3$ ) of (*E*)-4-(4-chlorobenzyl)-2-(3-oxo-1,5-di-*p*-tolylpent-4-en-1-yl)-3-phenylisoxazol-5(2H)-one (3j).

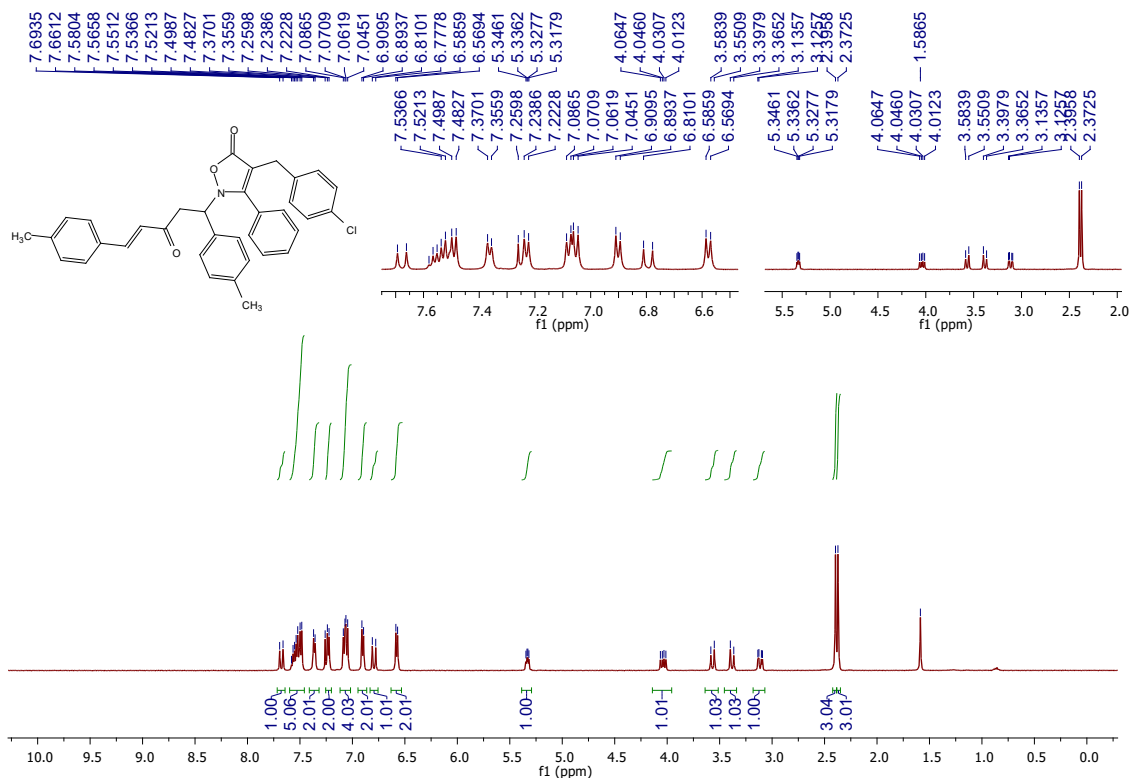

Figure S69.  $^{13}\text{C}$  { $^1\text{H}$ } NMR (125 MHz,  $\text{CDCl}_3$ ) of (*E*)-4-(4-chlorobenzyl)-2-(3-oxo-1,5-di-*p*-tolylpent-4-en-1-yl)-3-phenylisoxazol-5(2H)-one (3j).

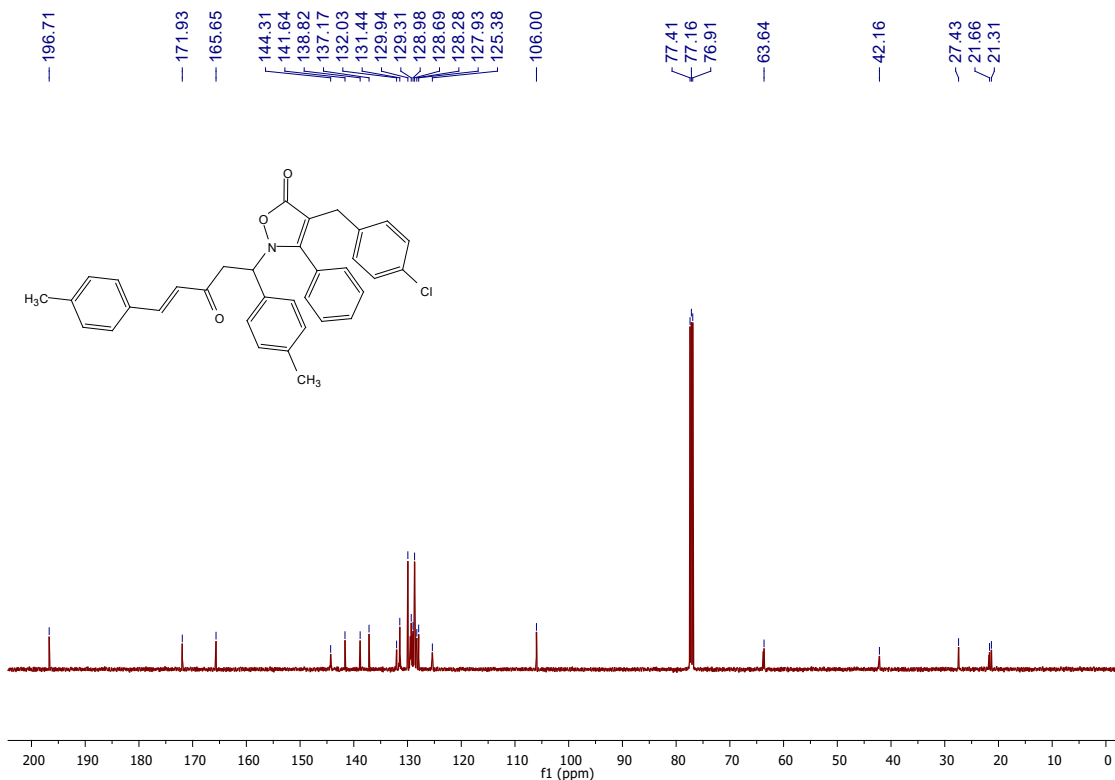

Figure S70. IR (ATR) of (*E*)-2-(1,5-bis(4-chlorophenyl)-3-oxopent-4-en-1-yl)-4-(4-chlorobenzyl)-3-phenylisoxazol-5(2H)-one (3k).

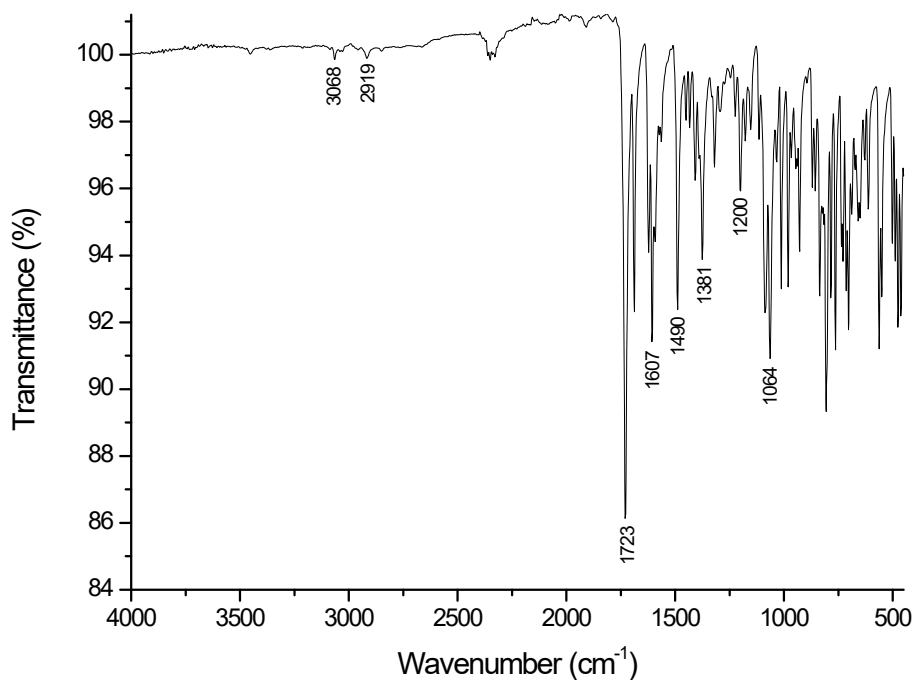

Figure S71. <sup>1</sup>H NMR (500 MHz, CDCl<sub>3</sub>) of (*E*)-2-(1,5-bis(4-chlorophenyl)-3-oxopent-4-en-1-yl)-4-(4-chlorobenzyl)-3-phenylisoxazol-5(2H)-one (3k).

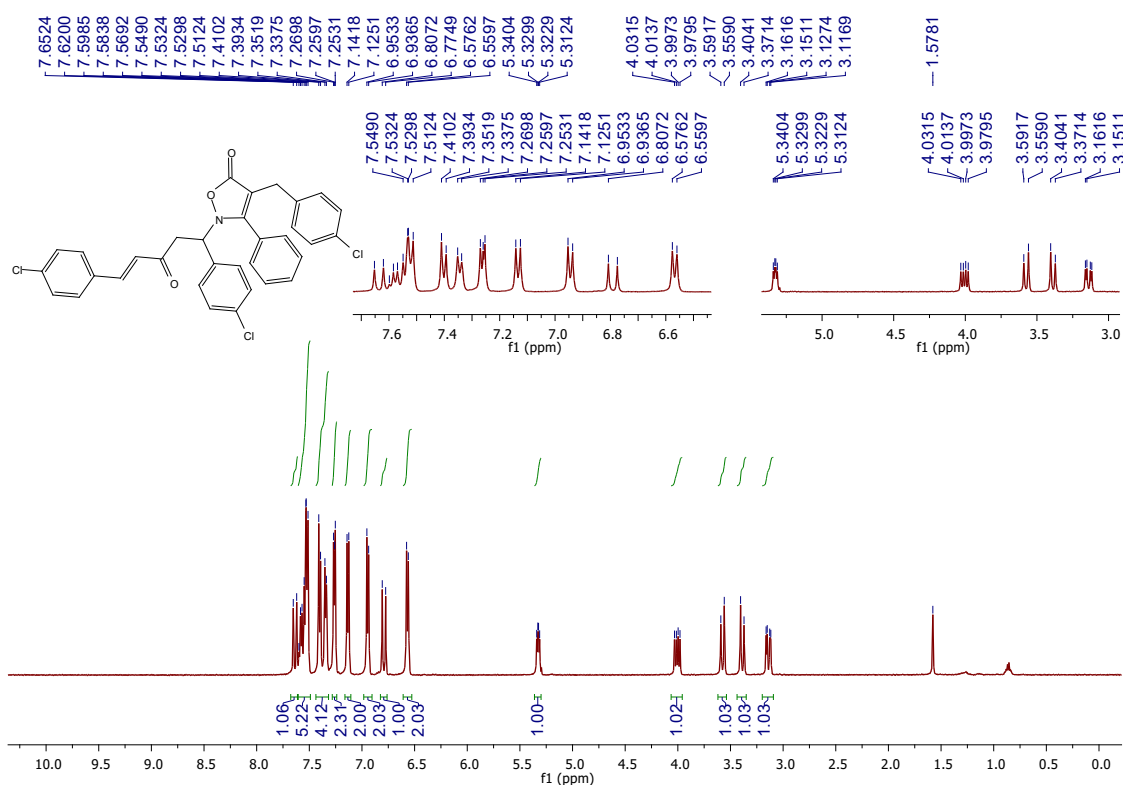

Figure S72.  $^{13}\text{C}$  { $^1\text{H}$ } NMR (125 MHz,  $\text{CDCl}_3$ ) of (*E*)-2-(1,5-bis(4-chlorophenyl)-3-oxopent-4-en-1-yl)-4-(4-chlorobenzyl)-3-phenylisoxazol-5(2H)-one (3k).

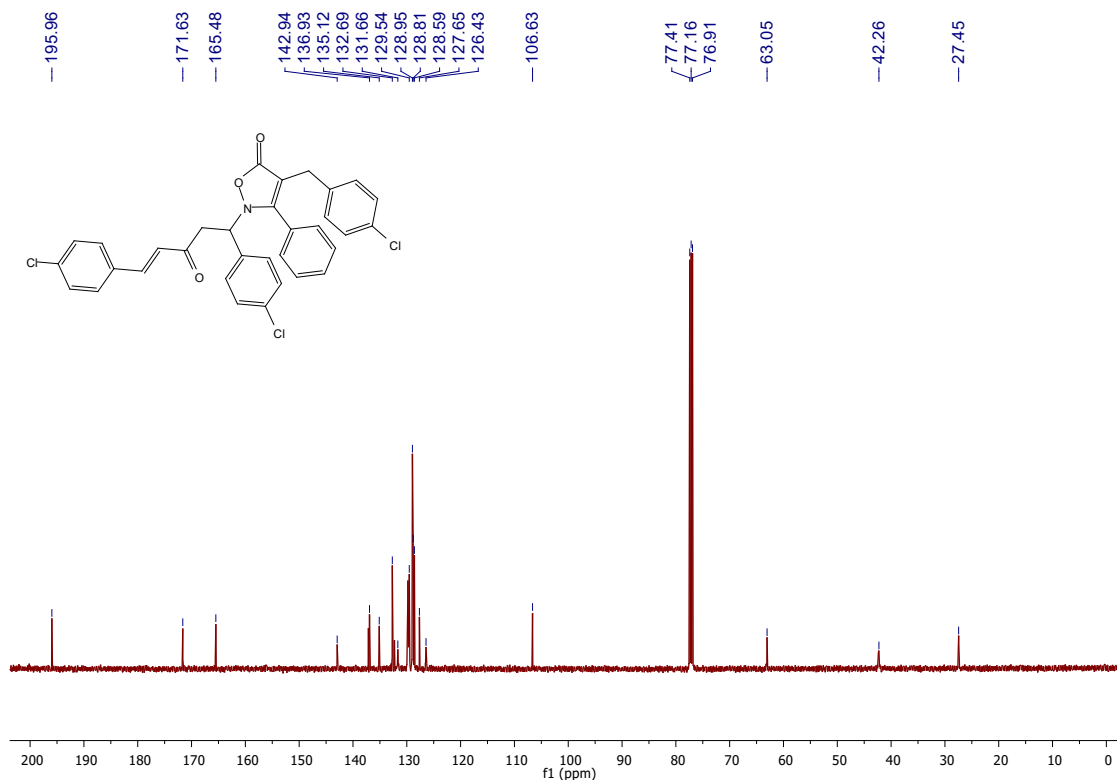

Figure S73. FT-IR (NaCl) of (*E*)-4-(furan-2-ylmethyl)-2-(3-oxo-1,5-diphenylpent-4-en-1-yl)-3-phenylisoxazol-5(2H)-one (3l).

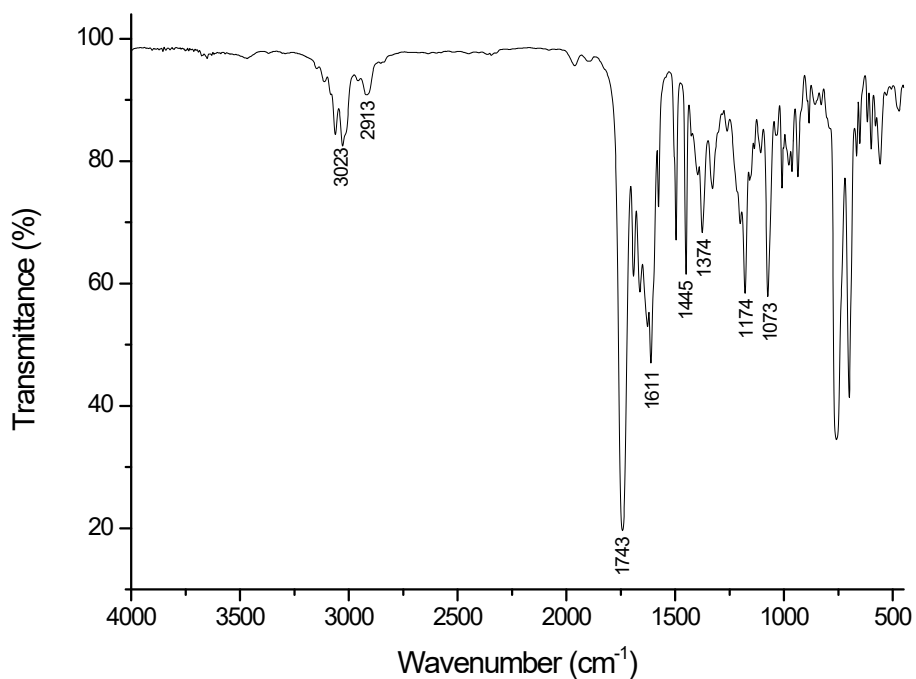

Figure S74.  $^1\text{H}$  NMR (500 MHz,  $\text{CDCl}_3$ ) of *(E)*-4-(furan-2-ylmethyl)-2-(3-oxo-1,5-diphenylpent-4-en-1-yl)-3-phenylisoxazol-5(2H)-one (3l).

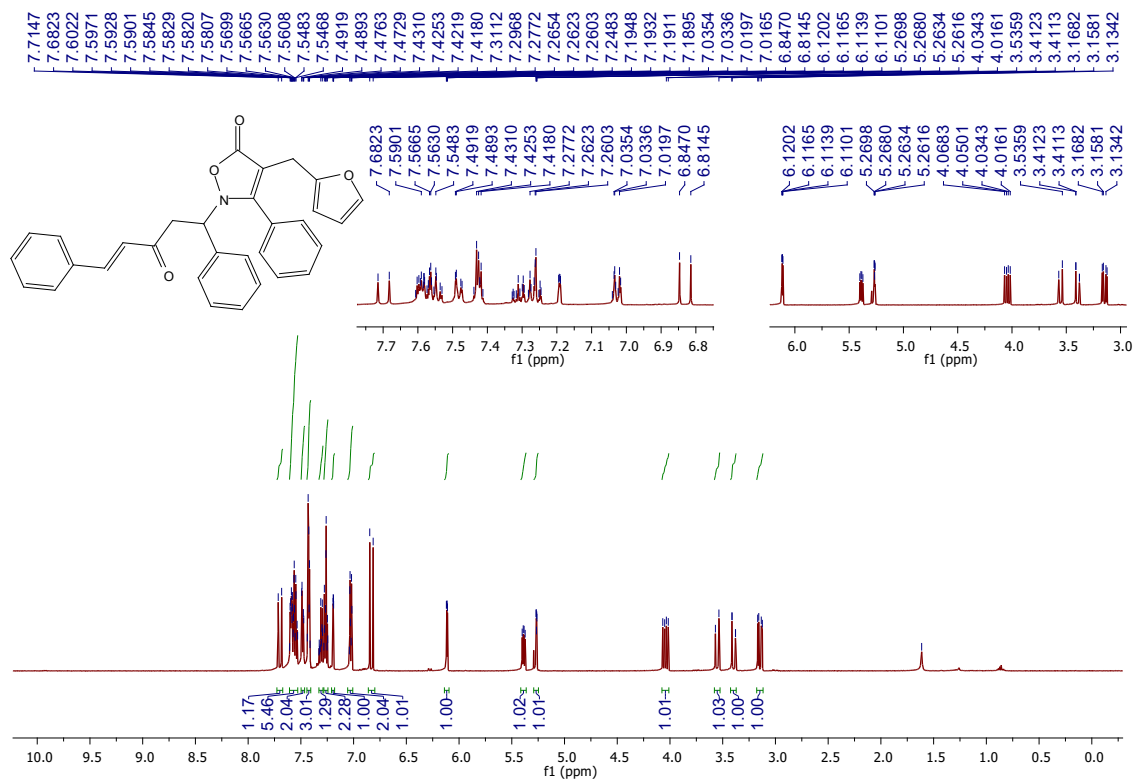

Figure S75.  $^{13}\text{C}$  { $^1\text{H}$ } NMR (125 MHz,  $\text{CDCl}_3$ ) of *(E)*-4-(furan-2-ylmethyl)-2-(3-oxo-1,5-diphenylpent-4-en-1-yl)-3-phenylisoxazol-5(2H)-one (3l).

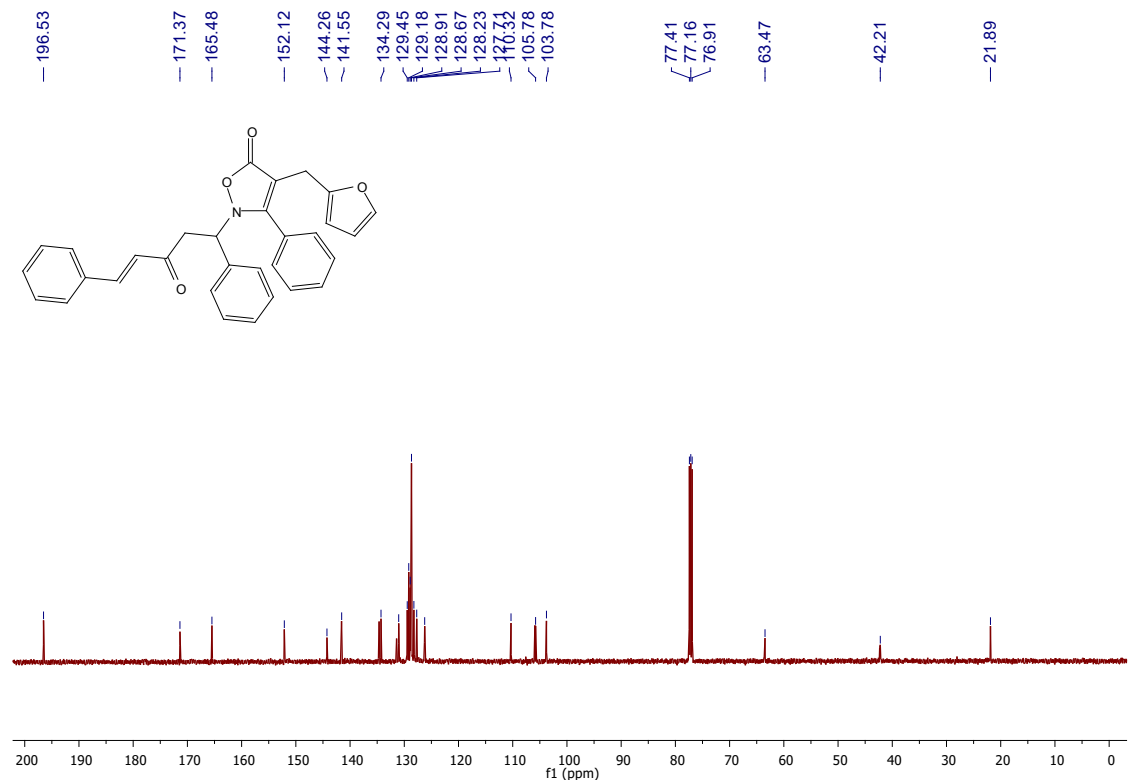



Figure S76. FT-IR (NaCl) of *(E)*-2-(1,5-bis(4-methoxyphenyl)-3-oxopent-4-en-1-yl)-4-(furan-2-ylmethyl)-3-phenylisoxazol-5(2H)-one (3m).

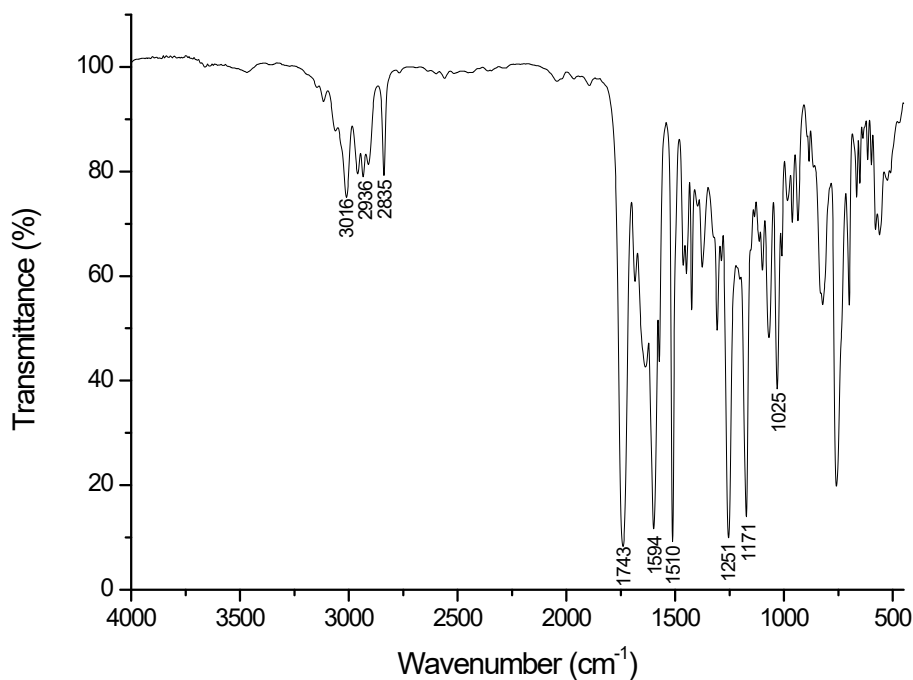

Figure S77. <sup>1</sup>H NMR (500 MHz, CDCl<sub>3</sub>) of *(E)*-2-(1,5-bis(4-methoxyphenyl)-3-oxopent-4-en-1-yl)-4-(furan-2-ylmethyl)-3-phenylisoxazol-5(2H)-one (3m).

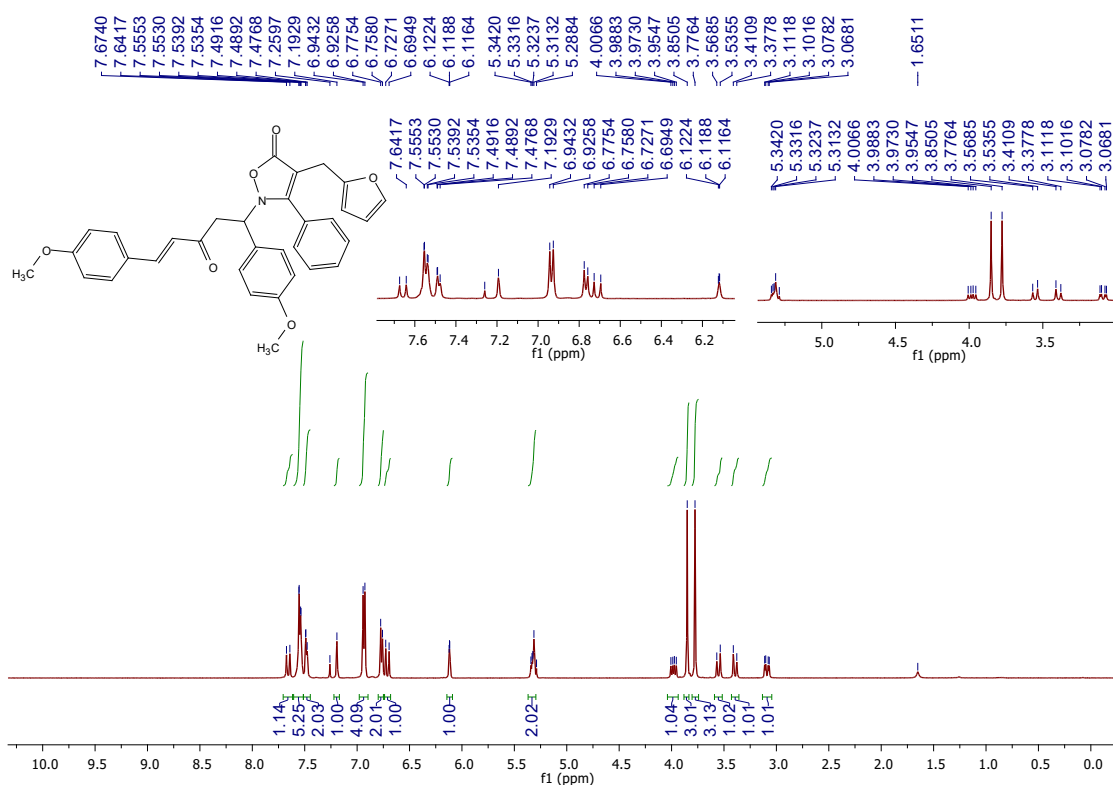

Figure S78.  $^{13}\text{C}$  { $^1\text{H}$ } NMR (125 MHz,  $\text{CDCl}_3$ ) of (*E*)-2-(1,5-bis(4-methoxyphenyl)-3-oxopent-4-en-1-yl)-4-(furan-2-ylmethyl)-3-phenylisoxazol-5(2H)-one (3m).

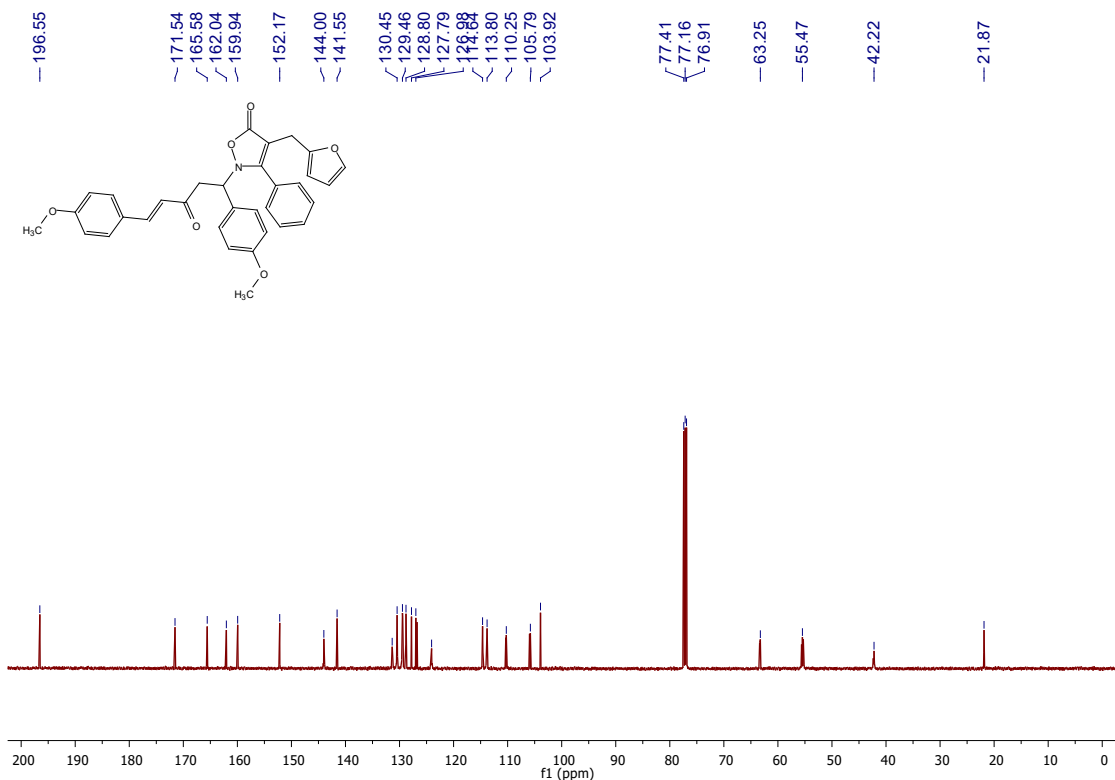

Figure S79. FT-IR (NaCl) of (*E*)-4-(furan-2-ylmethyl)-2-(3-oxo-1,5-di-*p*-tolylpent-4-en-1-yl)-3-phenylisoxazol-5(2H)-one (3n).

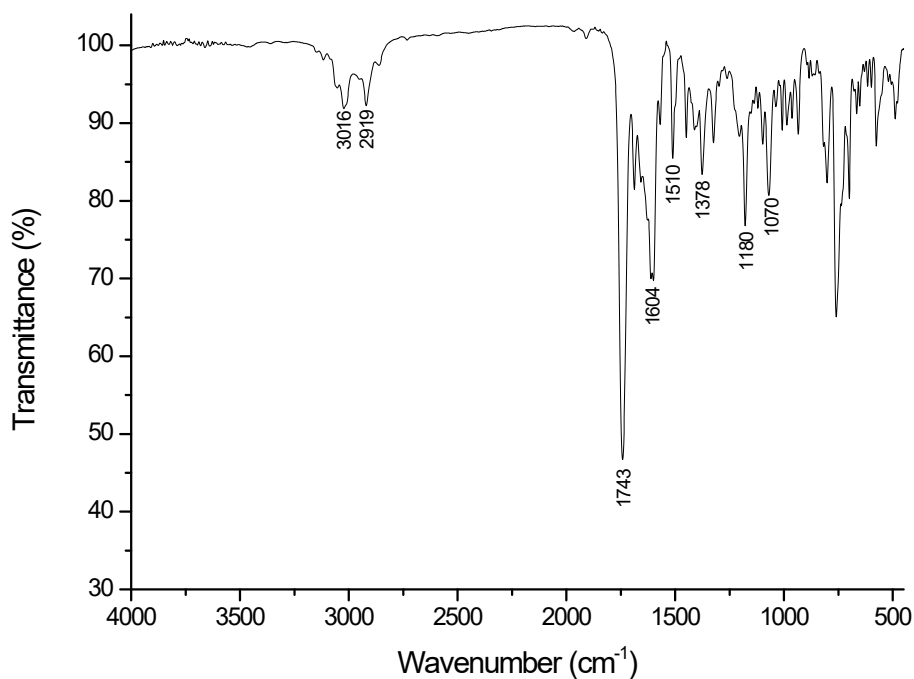

Figure S80.  $^1\text{H}$  NMR (500 MHz,  $\text{CDCl}_3$ ) of (*E*)-4-(furan-2-ylmethyl)-2-(3-oxo-1,5-di-*p*-tolylpent-4-en-1-yl)-3-phenylisoxazol-5(2*H*)-one (3n).

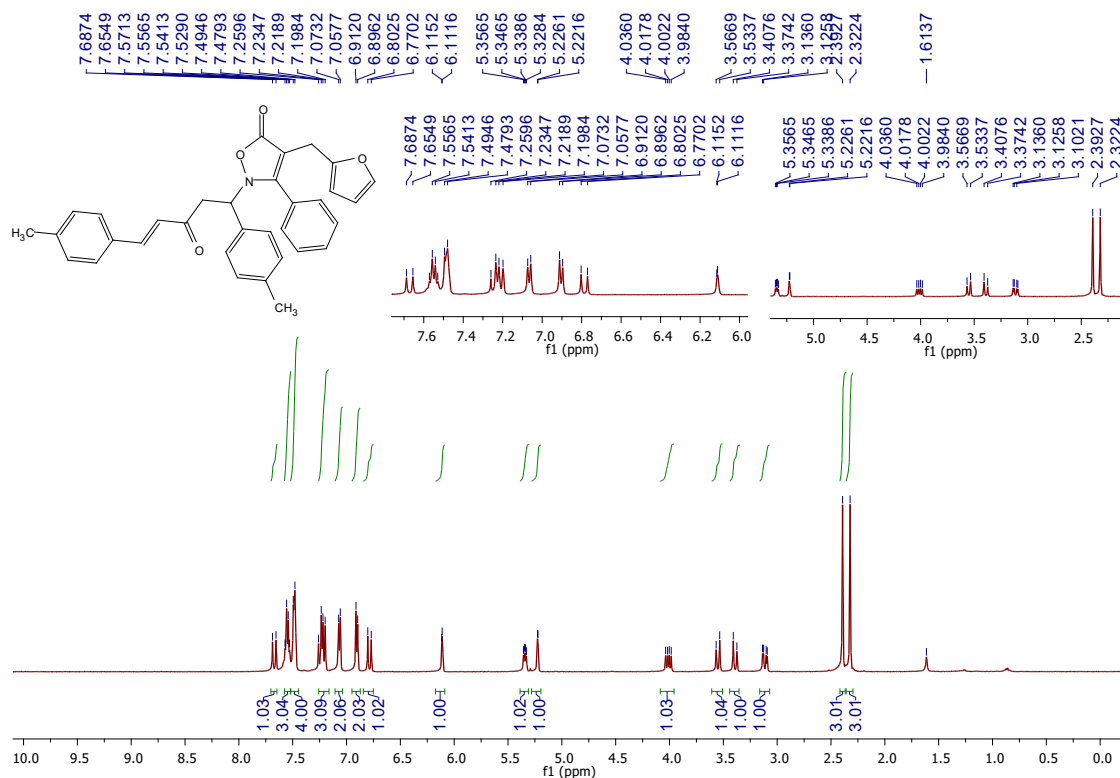

Figure S81.  $^{13}\text{C}$  { $^1\text{H}$ } NMR (125 MHz,  $\text{CDCl}_3$ ) of (*E*)-4-(furan-2-ylmethyl)-2-(3-oxo-1,5-di-*p*-tolylpent-4-en-1-yl)-3-phenylisoxazol-5(2*H*)-one (3n).

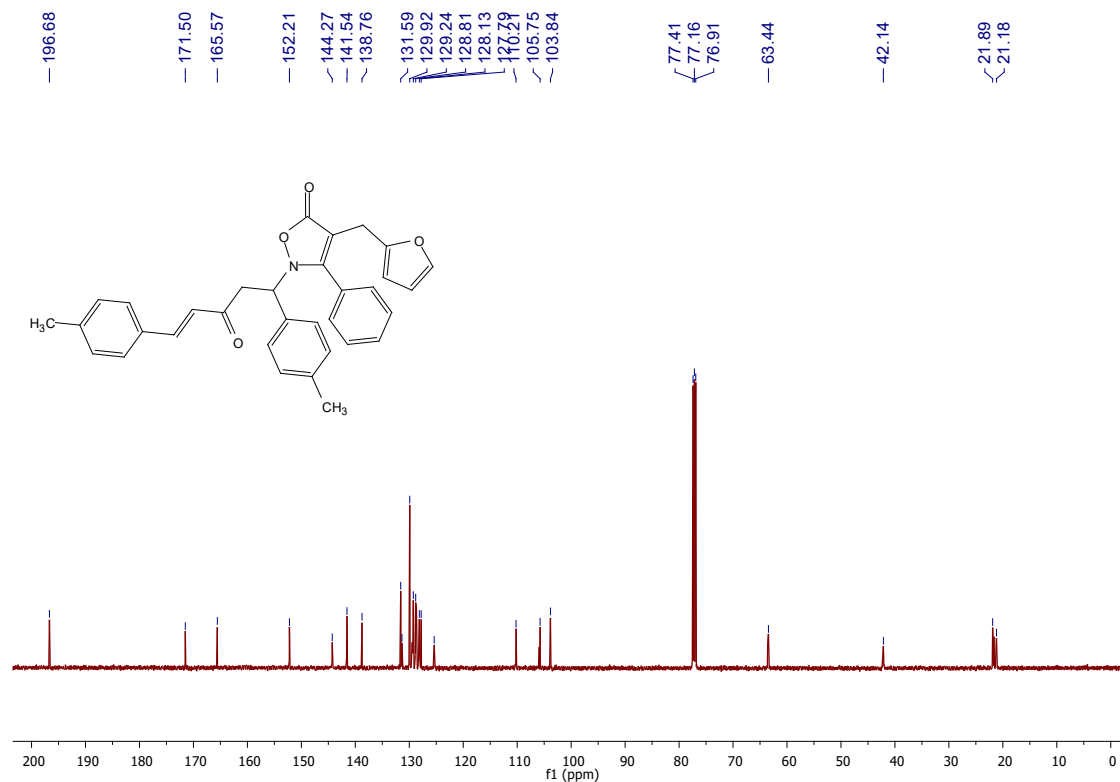

Figure S82. IR (ATR) of *(E)*-2-(1,5-bis(4-chlorophenyl)-3-oxopent-4-en-1-yl)-4-(furan-2-ylmethyl)-3-phenylisoxazol-5(2H)-one (3o).

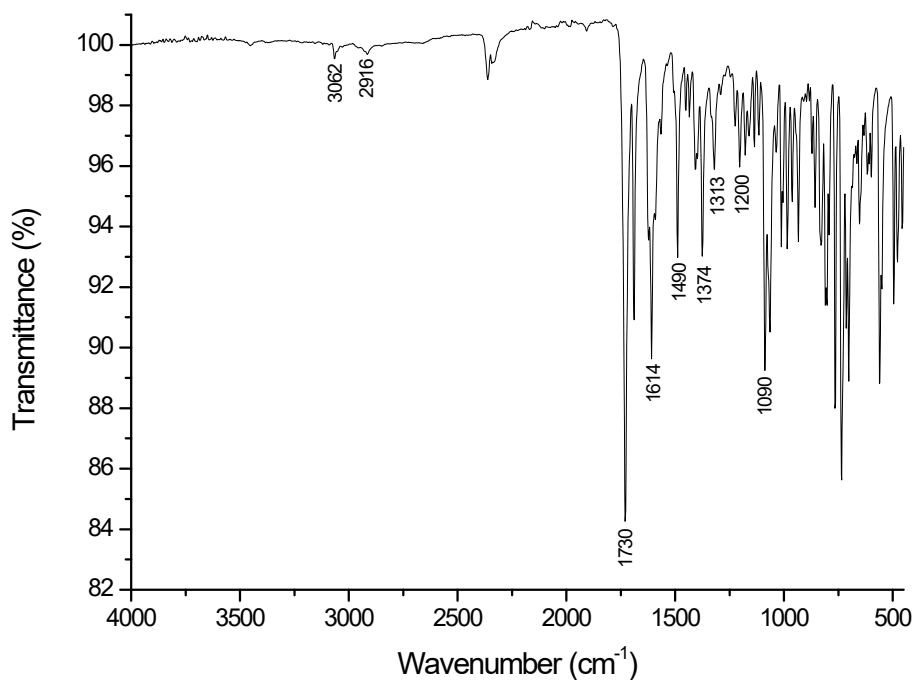

Figure S83. <sup>1</sup>H NMR (500 MHz, CDCl<sub>3</sub>) of *(E)*-2-(1,5-bis(4-chlorophenyl)-3-oxopent-4-en-1-yl)-4-(furan-2-ylmethyl)-3-phenylisoxazol-5(2H)-one (3o).

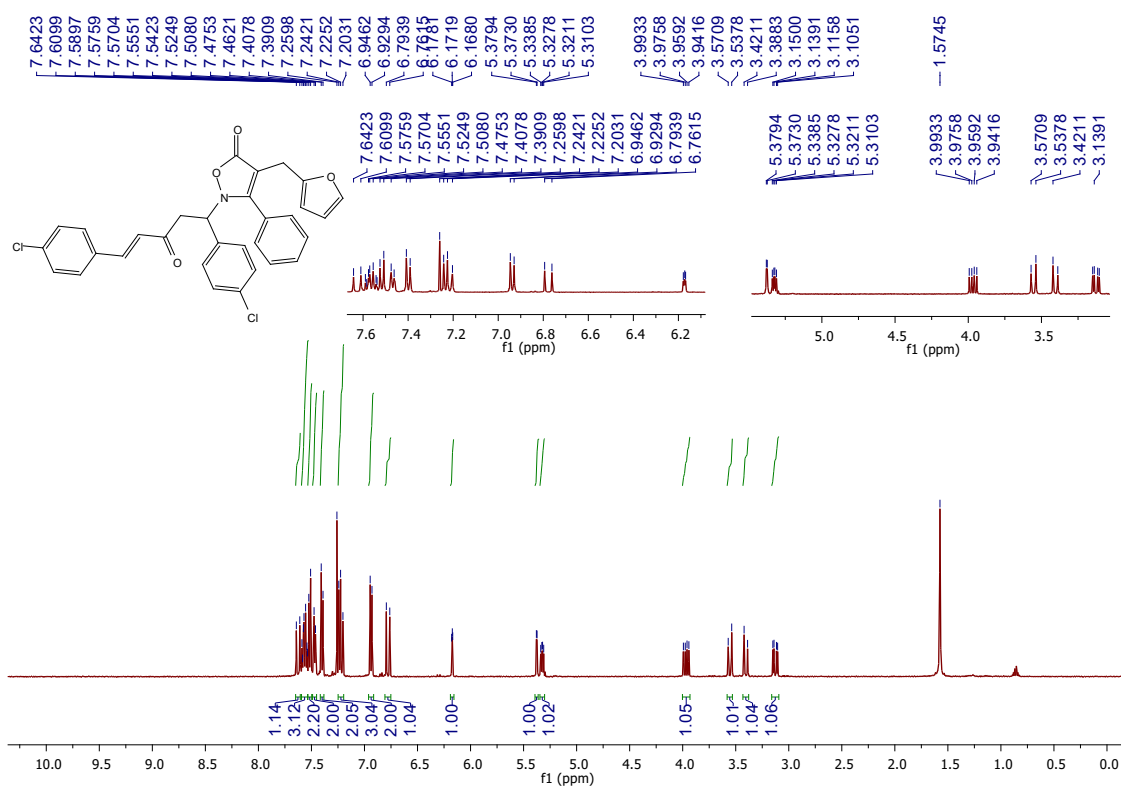

Figure S84.  $^{13}\text{C}$  { $^1\text{H}$ } NMR (125 MHz,  $\text{CDCl}_3$ ) of (*E*)-2-(1,5-bis(4-chlorophenyl)-3-oxopent-4-en-1-yl)-4-(furan-2-ylmethyl)-3-phenylisoxazol-5(2H)-one (3o).

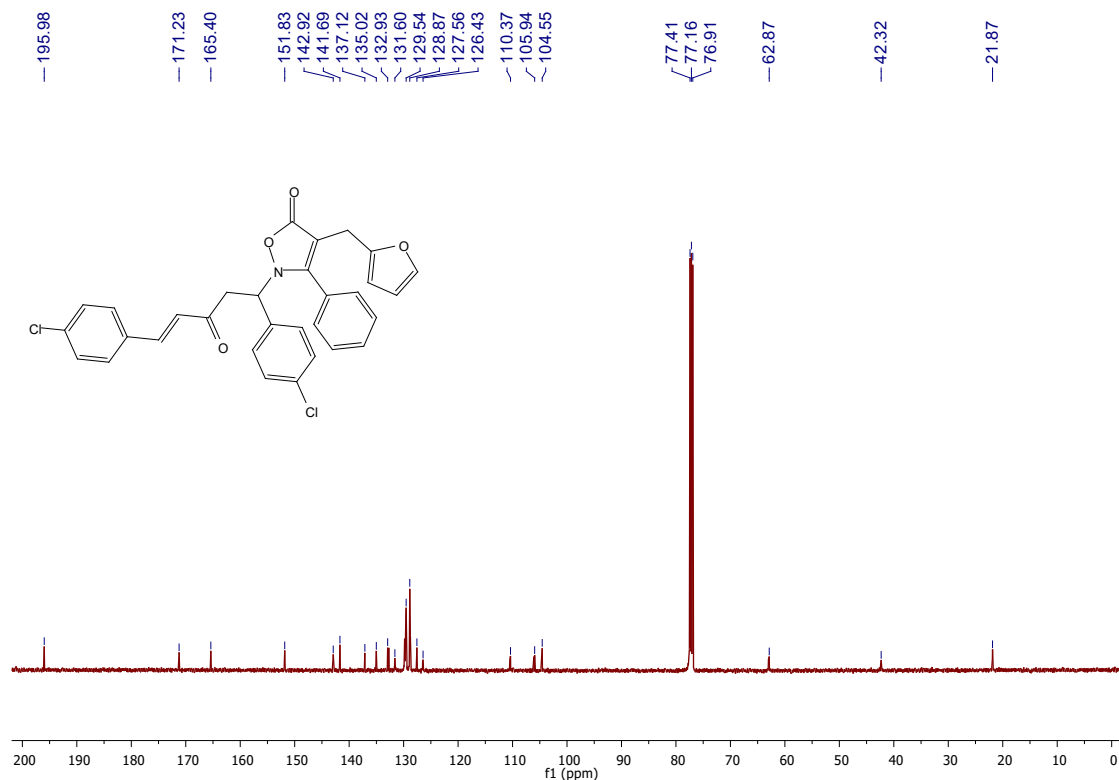

Figure S85. IR (ATR) of 4-benzyl-2-(3-oxocyclohexyl)-3-phenylisoxazol-5(2H)-one (3p).

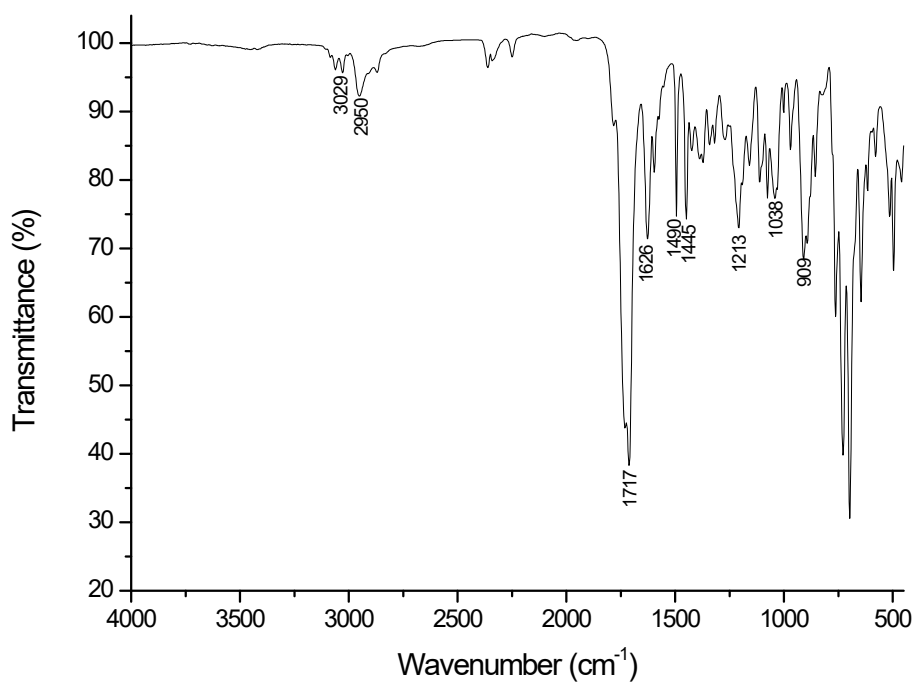

Figure S86.  $^1\text{H}$  NMR (500 MHz,  $\text{CDCl}_3$ ) of 4-benzyl-2-(3-oxocyclohexyl)-3-phenylisoxazol-5(2H)-one (3p).

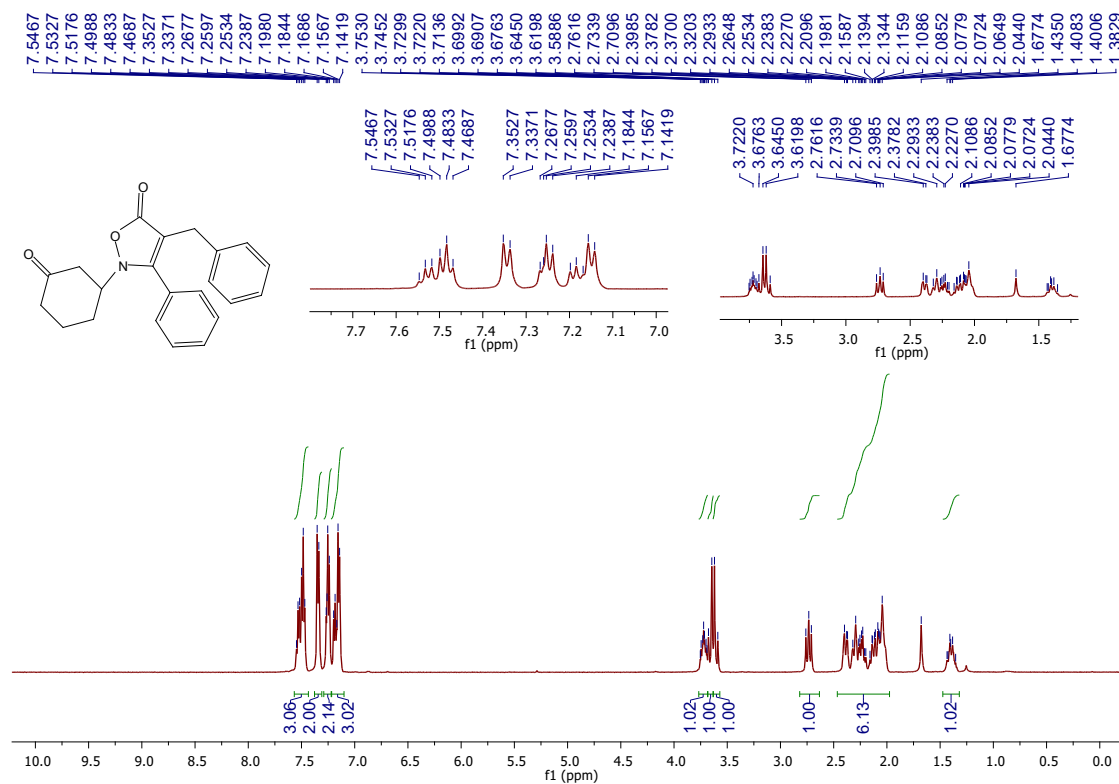

Figure S87.  $^{13}\text{C}$  { $^1\text{H}$ } NMR (125 MHz,  $\text{CDCl}_3$ ) of 4-benzyl-2-(3-oxocyclohexyl)-3-phenylisoxazol-5(2H)-one (3p).

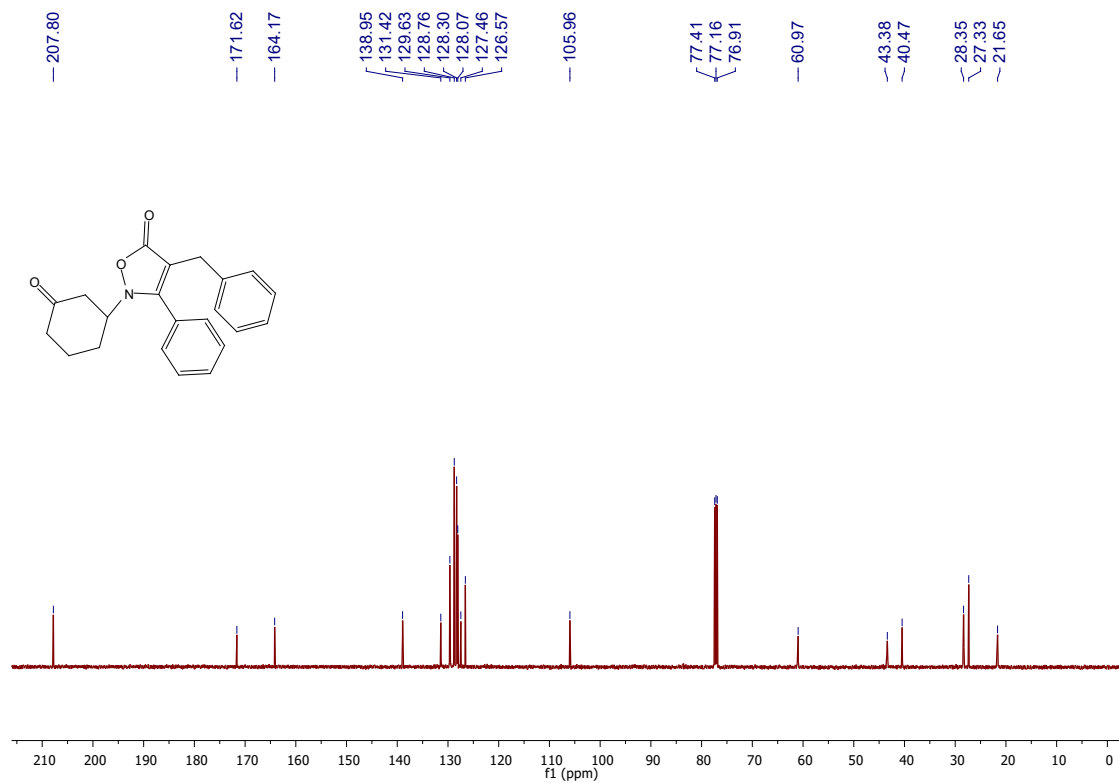

Figure S88. IR (ATR) of 4-benzyl-2-(3-oxobutyl)-3-phenylisoxazol-5(2H)-one (3q).

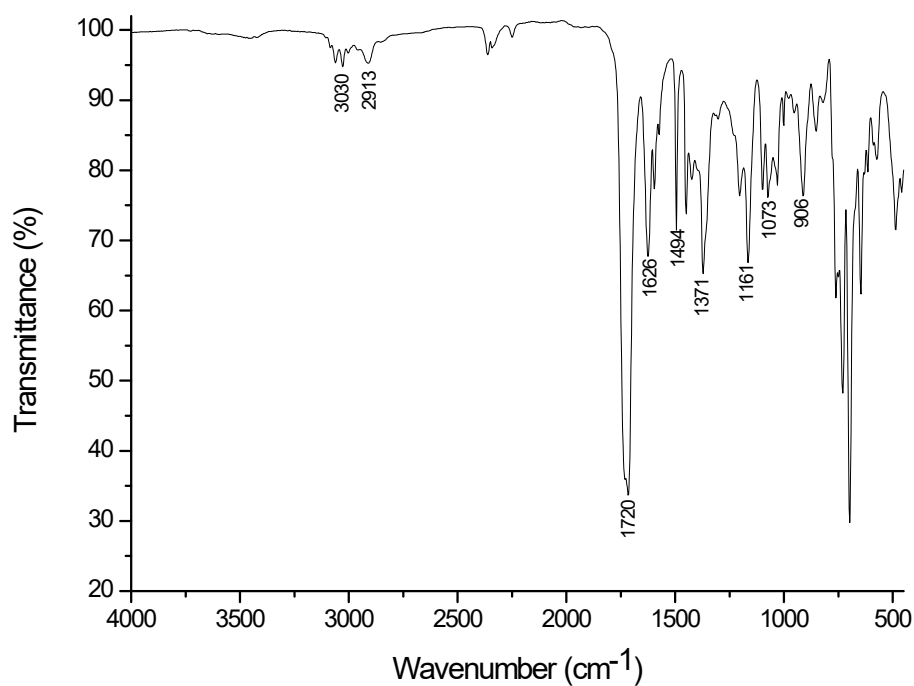

Figure S89. <sup>1</sup>H NMR (500 MHz, CDCl<sub>3</sub>) of 4-benzyl-2-(3-oxobutyl)-3-phenylisoxazol-5(2H)-one (3q).

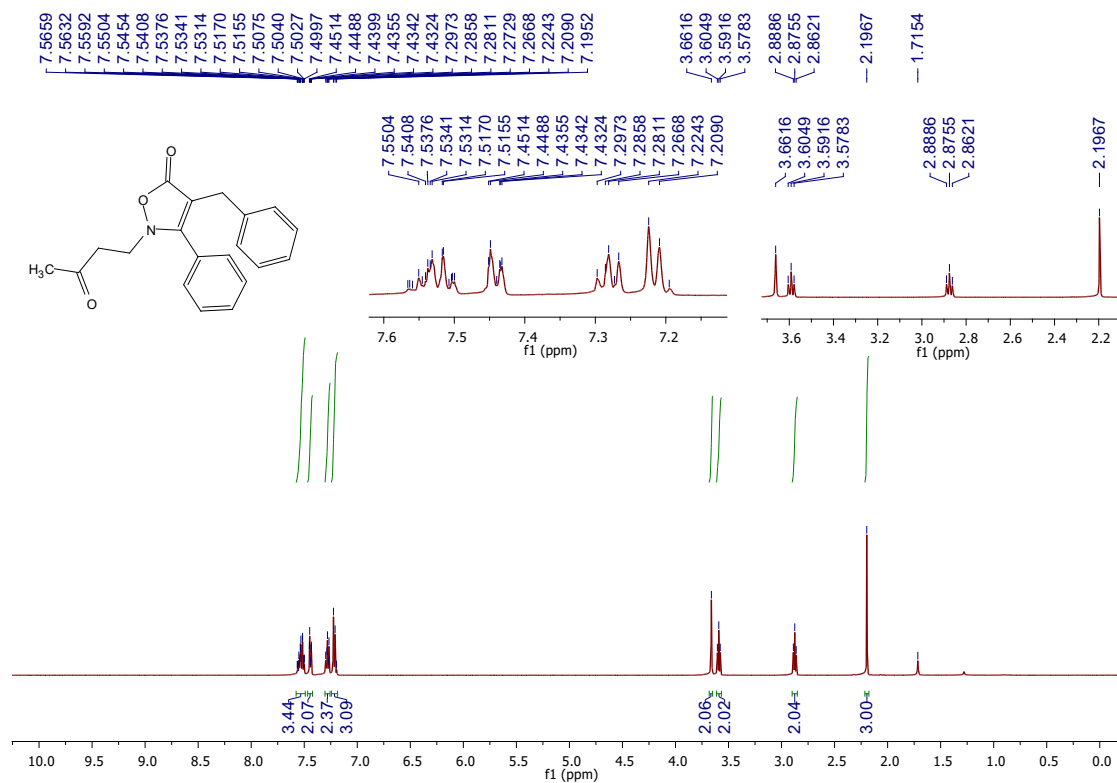

Figure S90.  $^{13}\text{C}$  { $^1\text{H}$ } NMR (125 MHz,  $\text{CDCl}_3$ ) of 4-benzyl-2-(3-oxobutyl)-3-phenylisoxazol-5(2H)-one (3q).

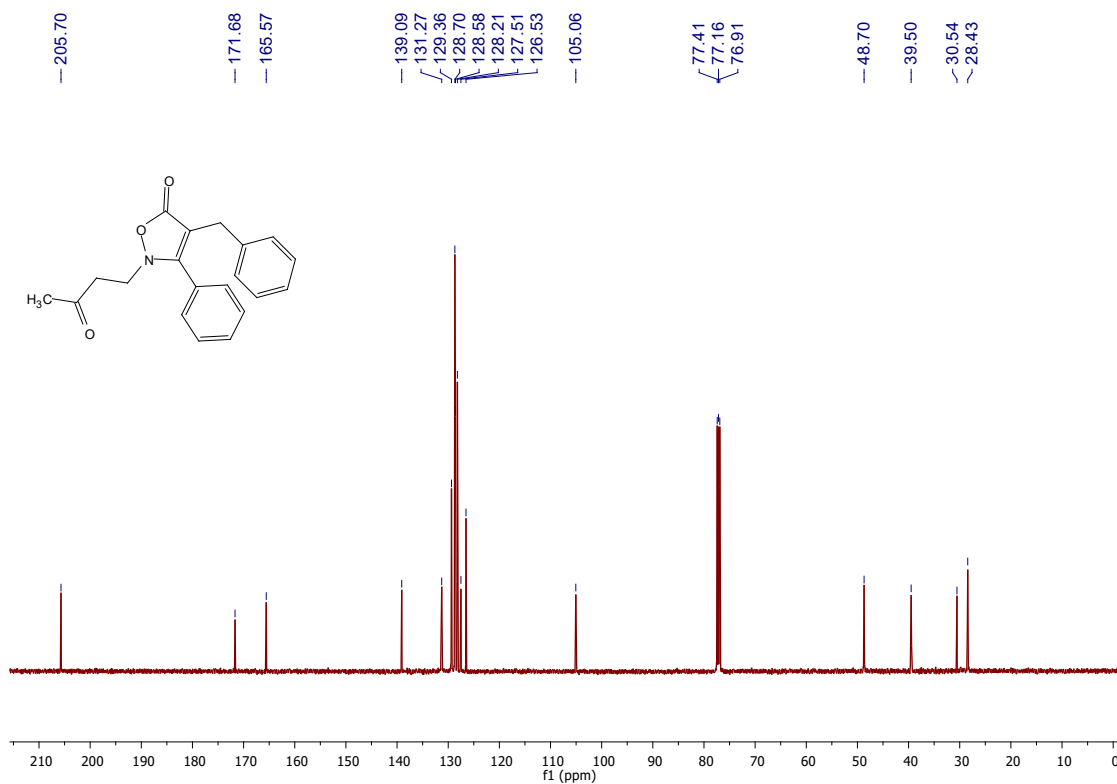

Figure S91. IR (ATR) of 4-benzyl-2-(3-oxo-1,3-diphenylpropyl)-3-phenylisoxazol-5(2H)-one (3r).

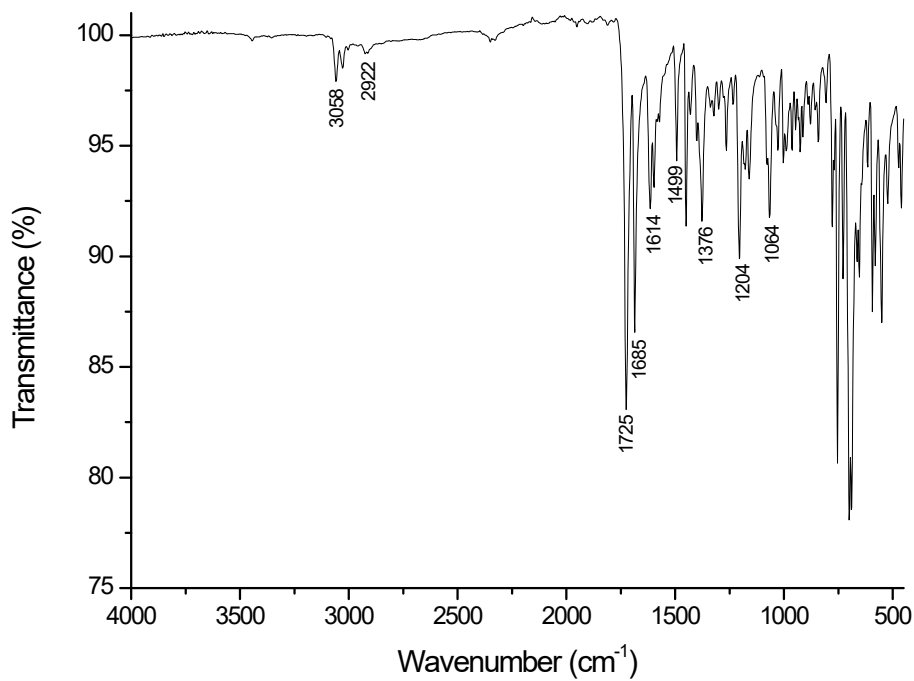



Figure S92.  $^1\text{H}$  NMR (500 MHz,  $\text{CDCl}_3$ ) of 4-benzyl-2-(3-oxo-1,3-diphenylpropyl)-3-phenylisoxazol-5(2H)-one (3r).

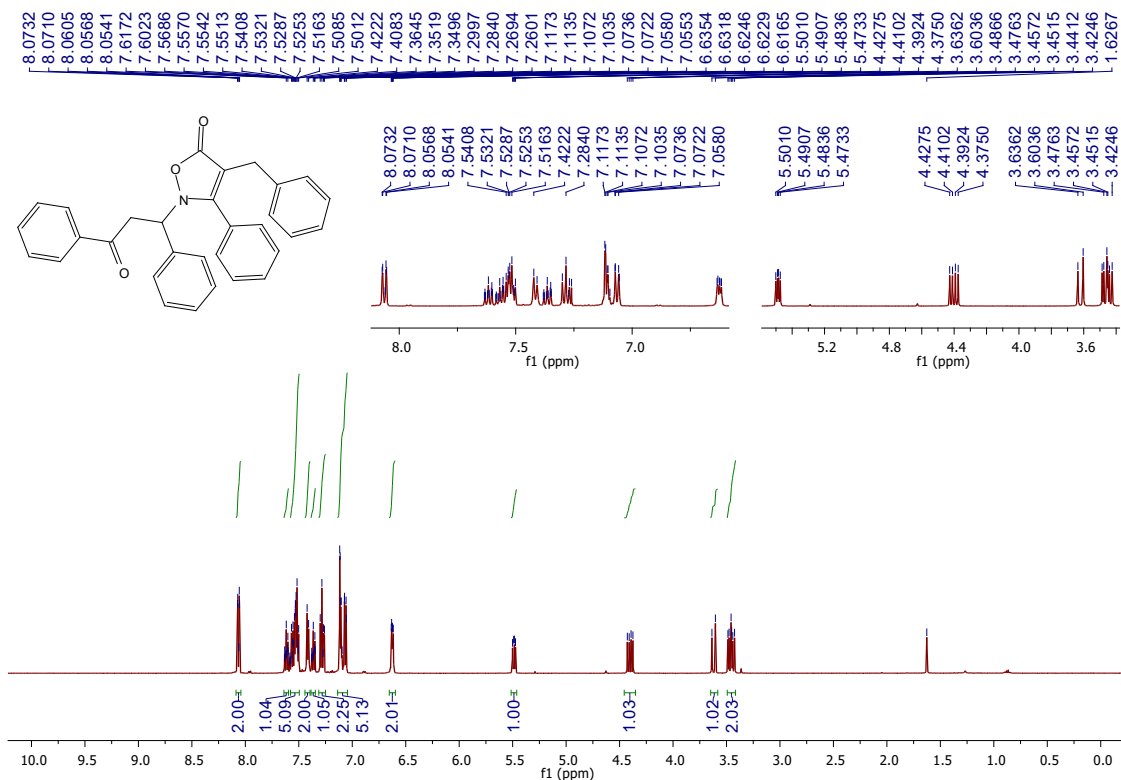

Figure S93.  $^{13}\text{C}$  { $^1\text{H}$ } NMR (125 MHz,  $\text{CDCl}_3$ ) of 4-benzyl-2-(3-oxo-1,3-diphenylpropyl)-3-phenylisoxazol-5(2H)-one (3r).

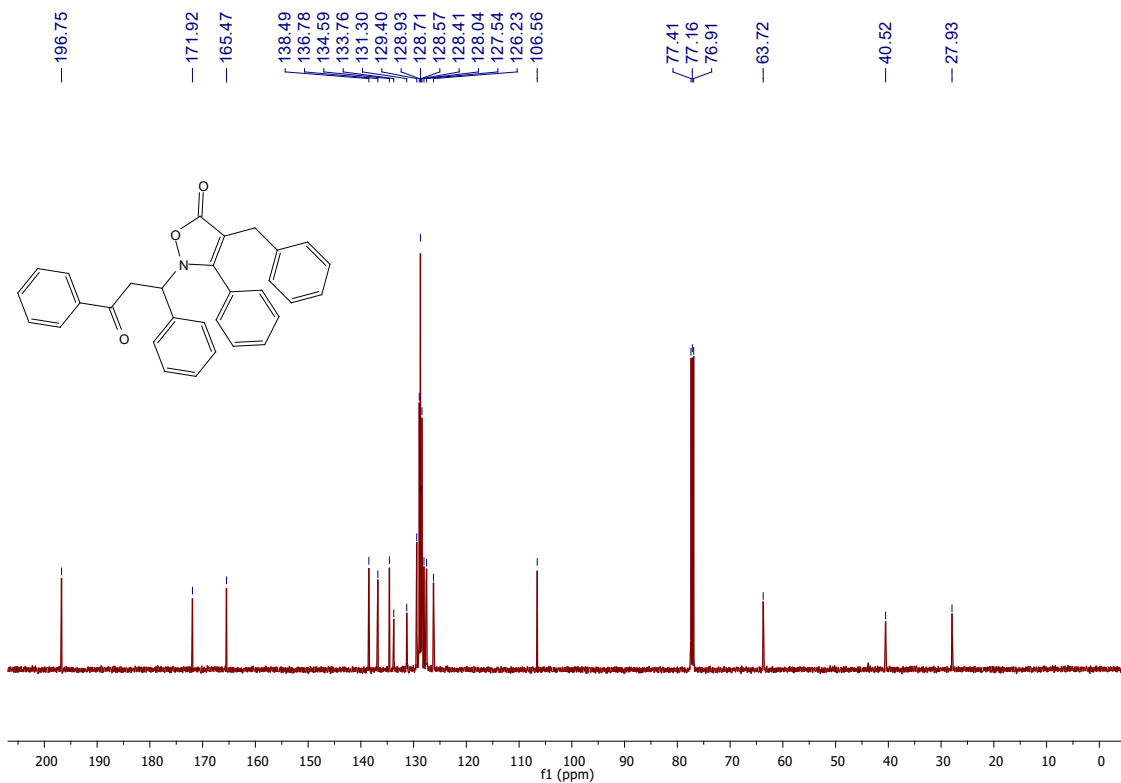

Figure S94. IR (ATR) of 4-benzyl-2-(1-(4-chlorophenyl)-3-oxo-3-phenylpropyl)-3-phenylisoxazol-5(2H)-one (3s).

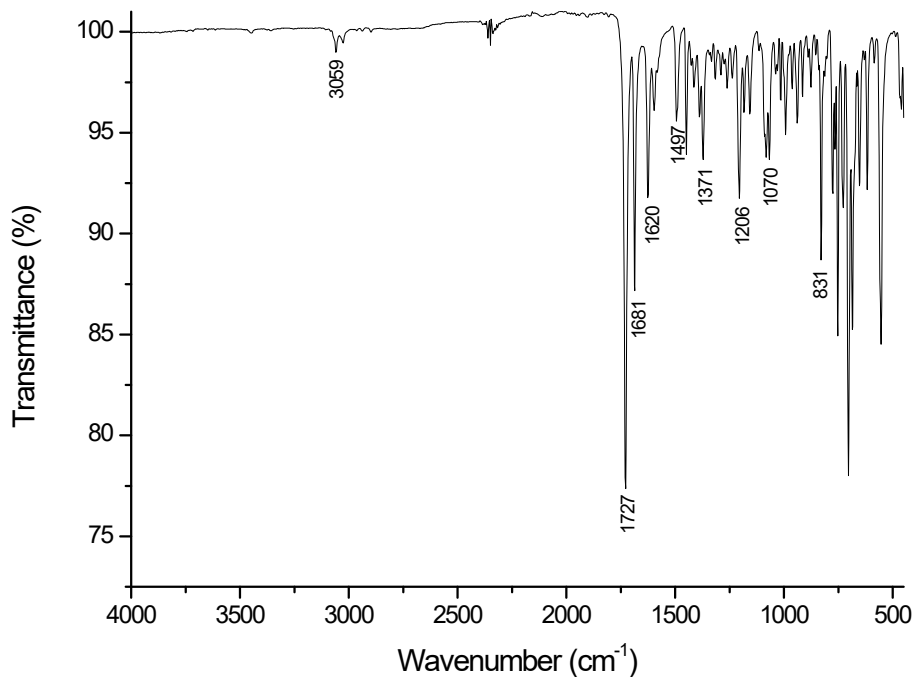

Figure S95. <sup>1</sup>H NMR (500 MHz, CDCl<sub>3</sub>) of 4-benzyl-2-(1-(4-chlorophenyl)-3-oxo-3-phenylpropyl)-3-phenylisoxazol-5(2H)-one (3s).

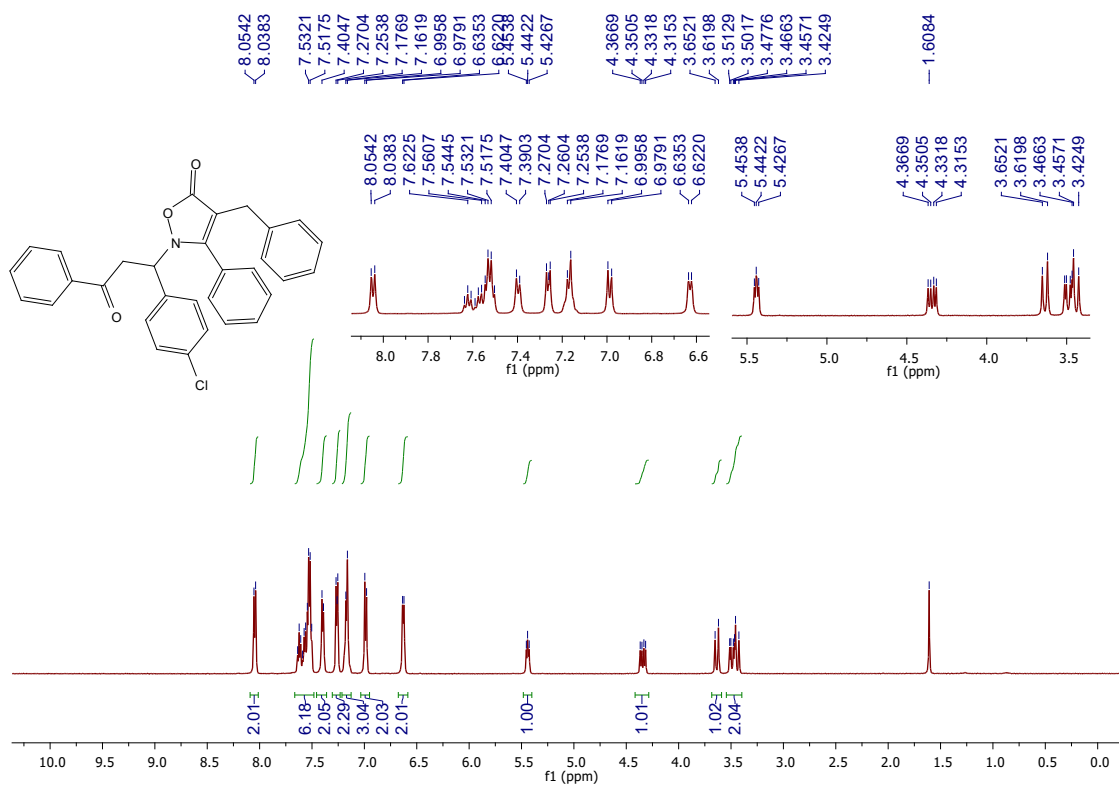

Figure S96.  $^{13}\text{C}$  { $^1\text{H}$ } NMR (125 MHz,  $\text{CDCl}_3$ ) of 4-benzyl-2-(1-(4-chlorophenyl)-3-oxo-3-phenylpropyl)-3-phenylisoxazol-5(2H)-one (3s).

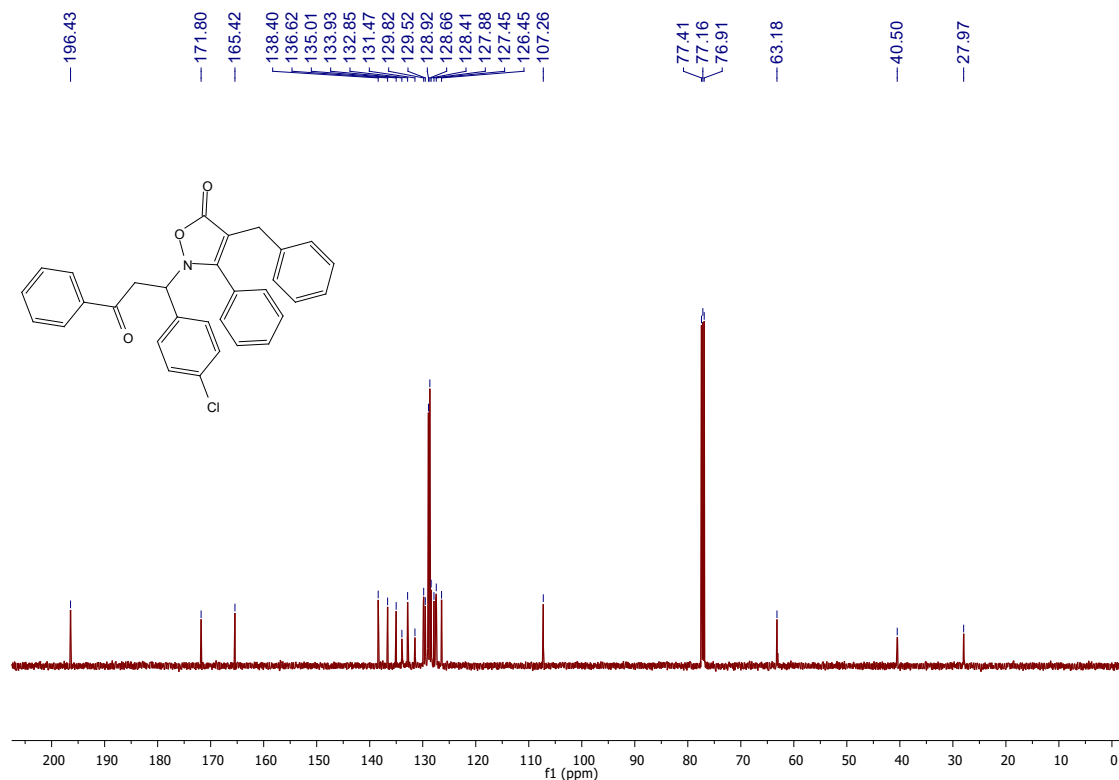

Figure S97. IR (ATR) of 4-benzyl-2-(3-oxo-3-phenyl-1-(p-tolyl)propyl)-3-phenylisoxazol-5(2H)-one (3t).

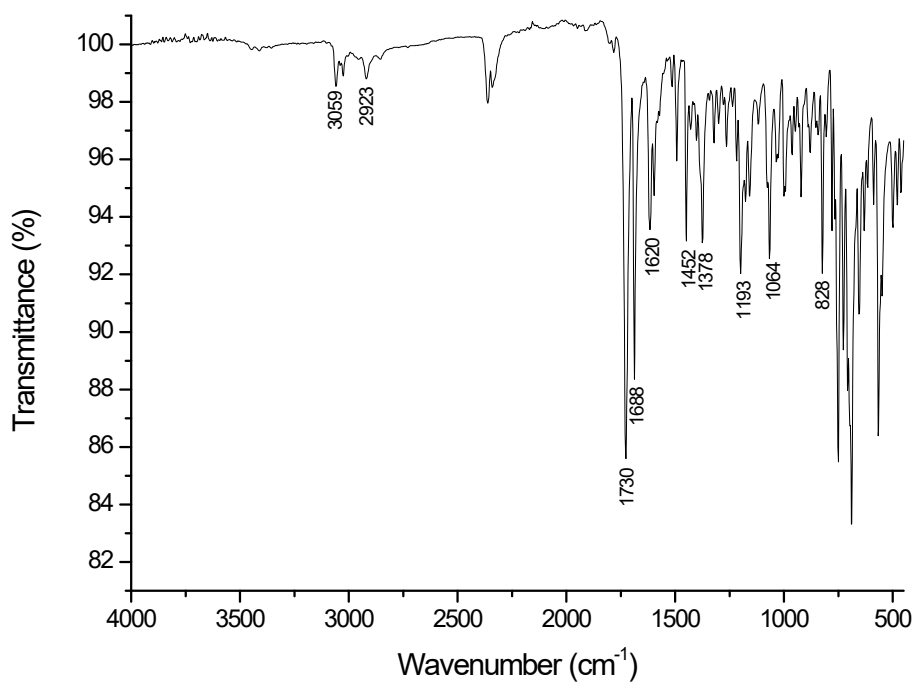

Figure S98.  $^1\text{H}$  NMR (500 MHz,  $\text{CDCl}_3$ ) of 4-benzyl-2-(3-oxo-3-phenyl-1-(p-tolyl)propyl)-3-phenylisoxazol-5(2H)-one (3t).

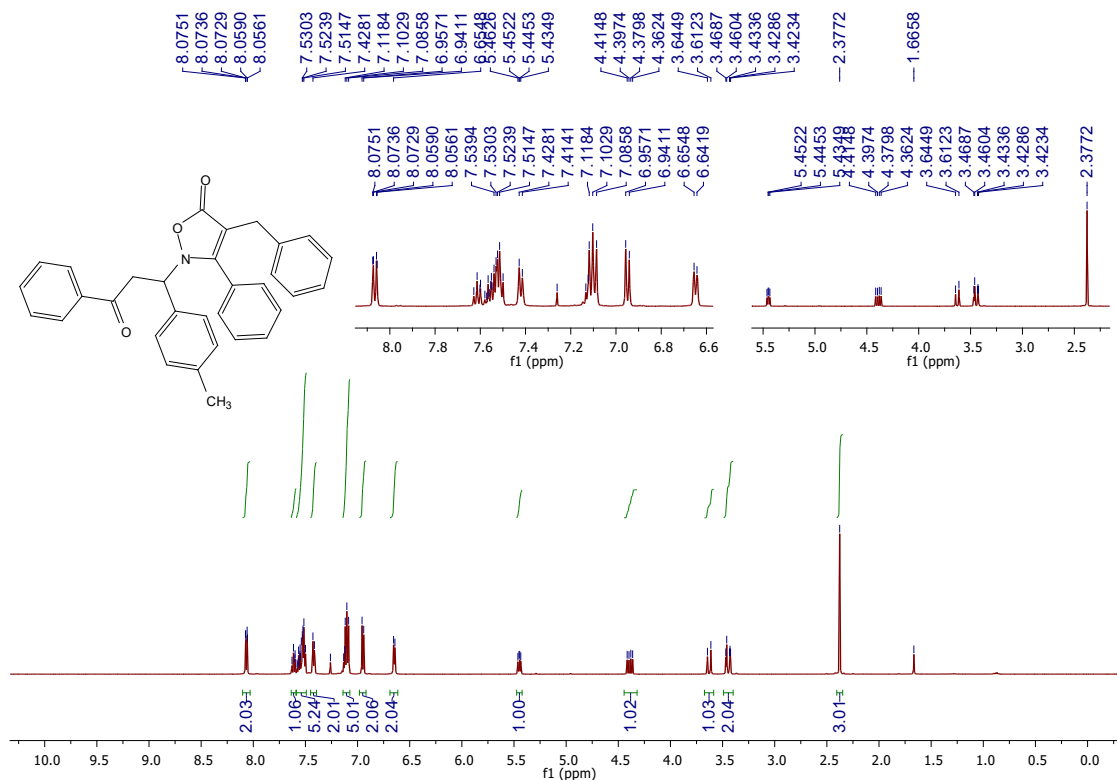

Figure S99.  $^{13}\text{C}$  { $^1\text{H}$ } NMR (125 MHz,  $\text{CDCl}_3$ ) of 4-benzyl-2-(3-oxo-3-phenyl-1-(p-tolyl)propyl)-3-phenylisoxazol-5(2H)-one (3t).

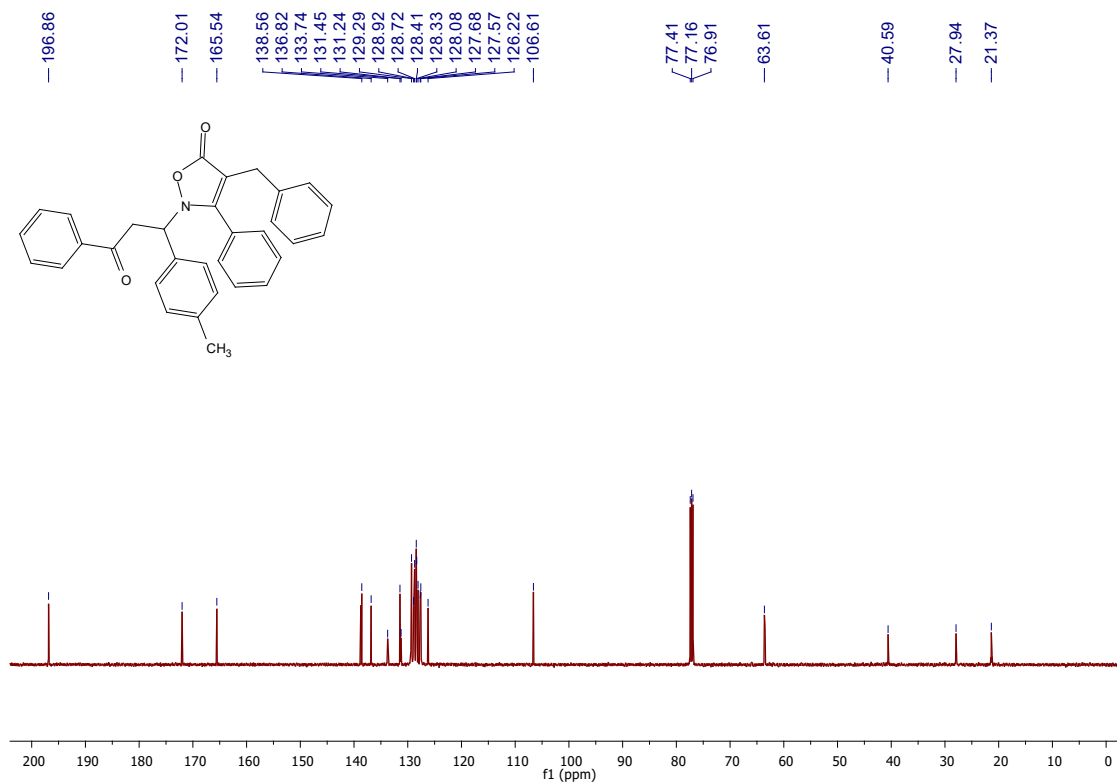

Figure S100. IR (ATR) of 4-benzyl-2-(1-(4-bromophenyl)-3-oxo-3-phenylpropyl)-3-phenylisoxazol-5(2H)-one (3u).

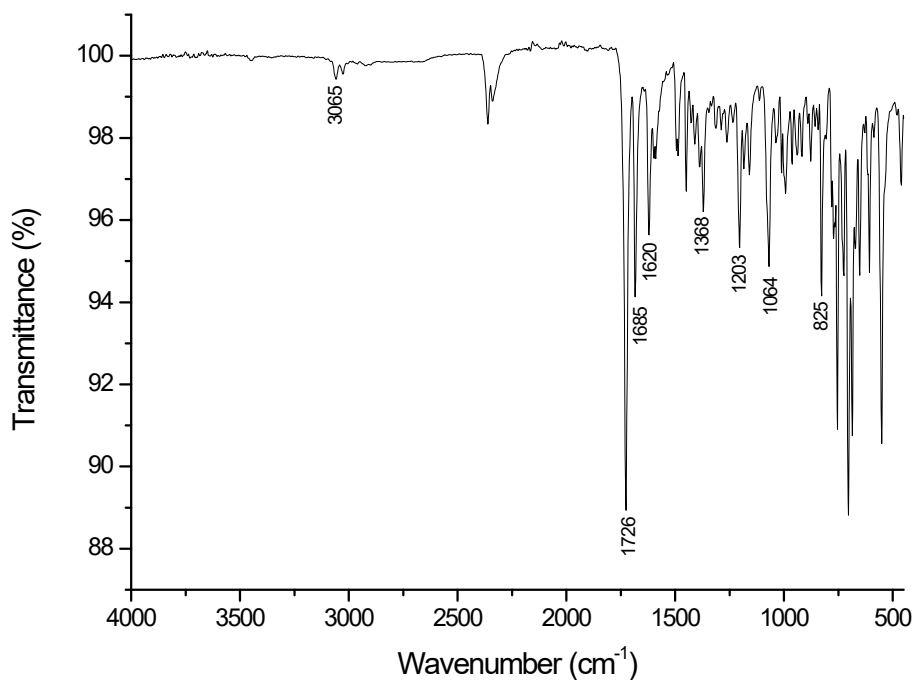

Figure S101. <sup>1</sup>H NMR (500 MHz, CDCl<sub>3</sub>) of 4-benzyl-2-(1-(4-bromophenyl)-3-oxo-3-phenylpropyl)-3-phenylisoxazol-5(2H)-one (3u).

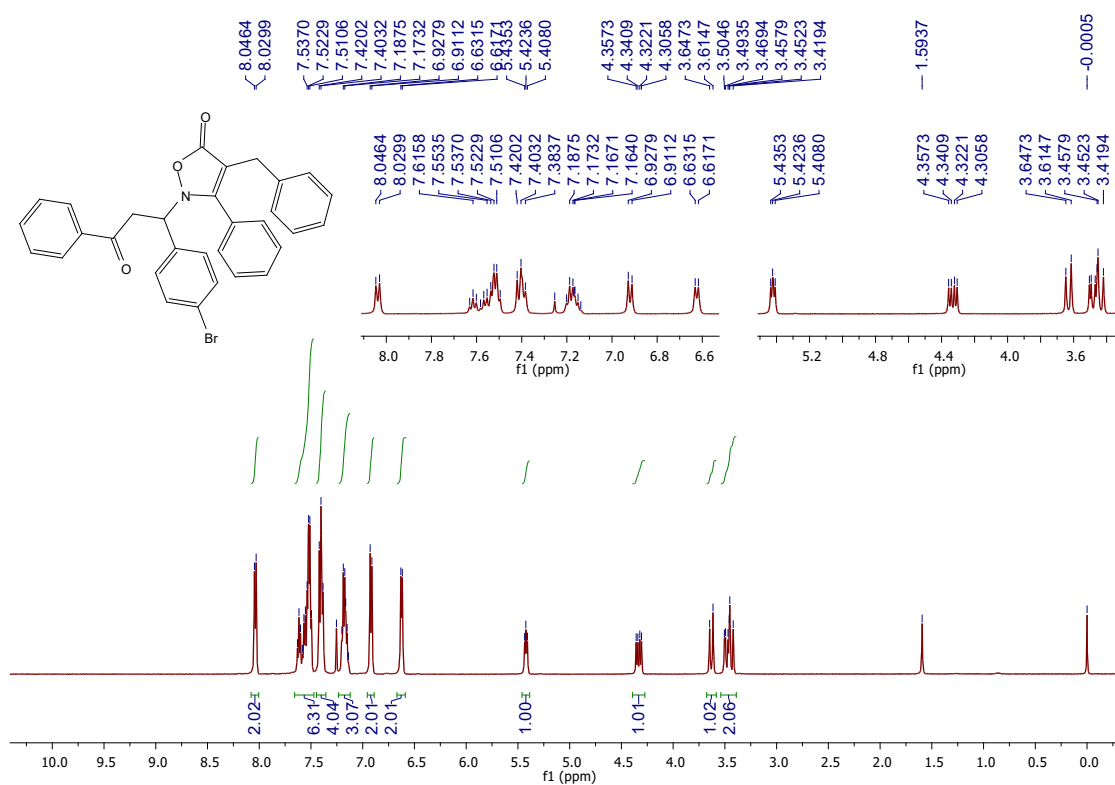

Figure S102.  $^{13}\text{C}$  { $^1\text{H}$ } NMR (125 MHz,  $\text{CDCl}_3$ ) of 4-benzyl-2-(1-(4-bromophenyl)-3-oxo-3-phenylpropyl)-3-phenylisoxazol-5(2H)-one (3u).

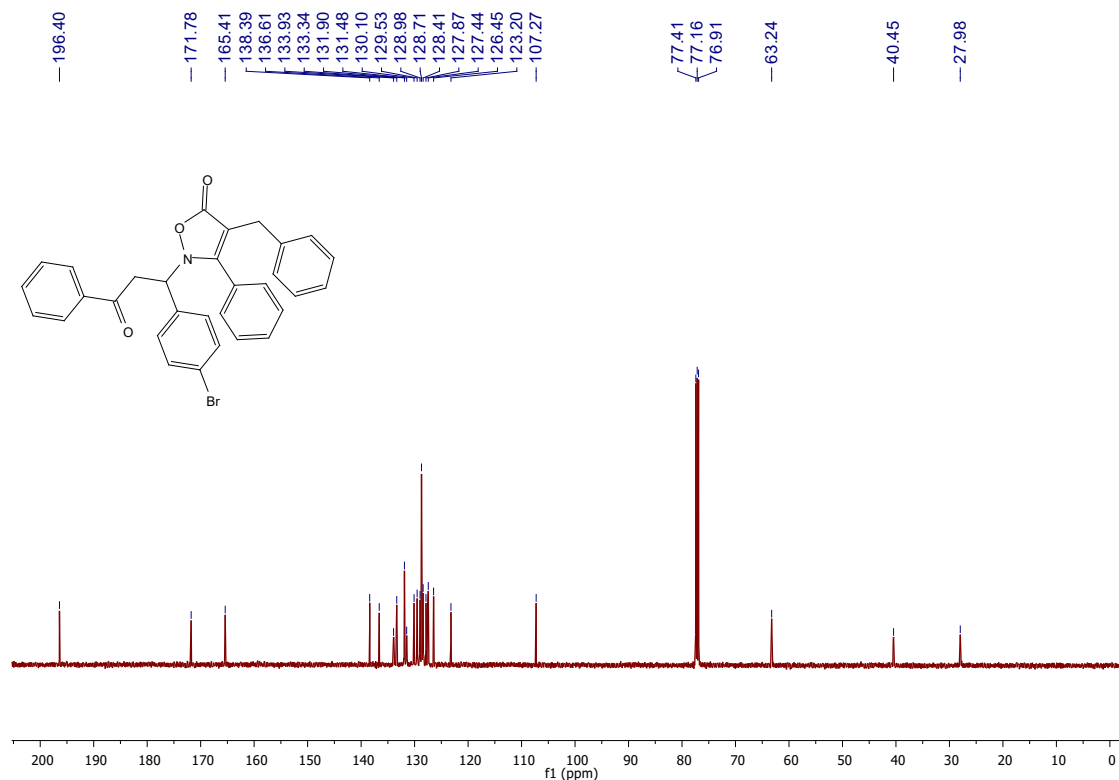

Figure S103. IR (ATR) of (*E*)-4-benzyl-2-(3-hydroxy-1,5-diphenylpent-4-en-1-yl)-3-phenylisoxazol-5(2H)-one (4a).

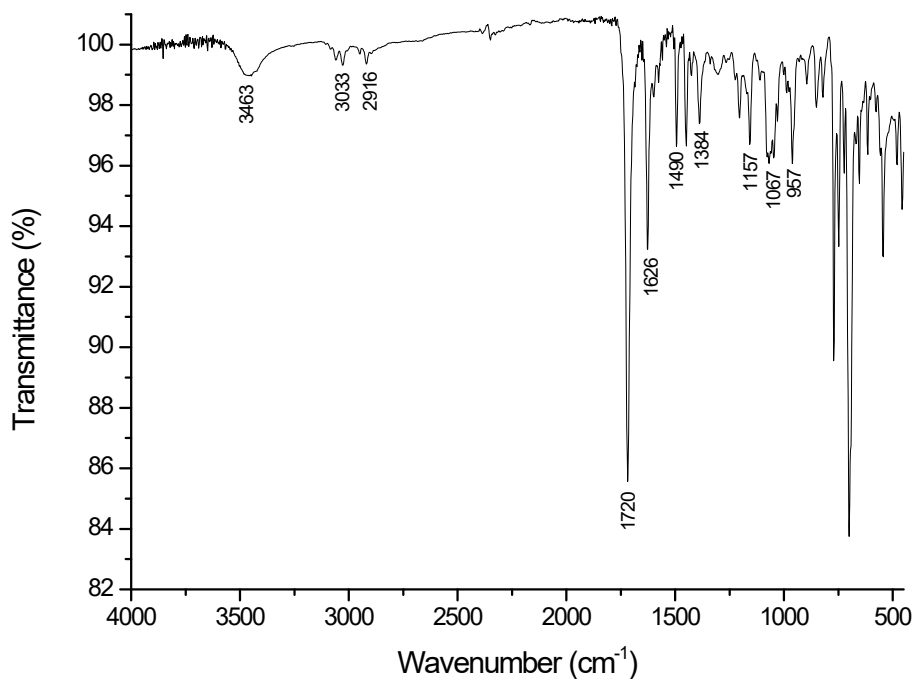

Figure S104.  $^1\text{H}$  NMR (500 MHz,  $\text{CDCl}_3$ ) of (*E*)-4-benzyl-2-(3-hydroxy-1,5-diphenylpent-4-en-1-yl)-3-phenylisoxazol-5(2H)-one (4a).

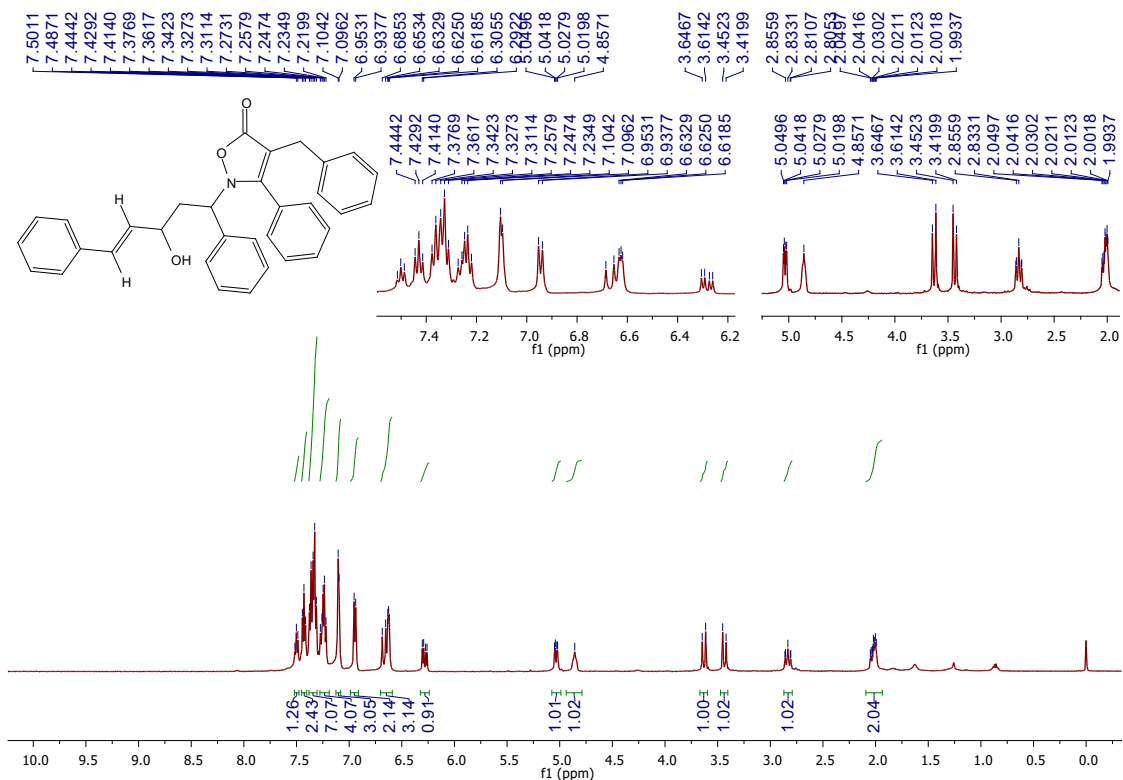

Figure S105.  $^{13}\text{C}$  { $^1\text{H}$ } NMR (125 MHz,  $\text{CDCl}_3$ ) of (*E*)-4-benzyl-2-(3-hydroxy-1,5-diphenylpent-4-en-1-yl)-3-phenylisoxazol-5(2H)-one (4a).

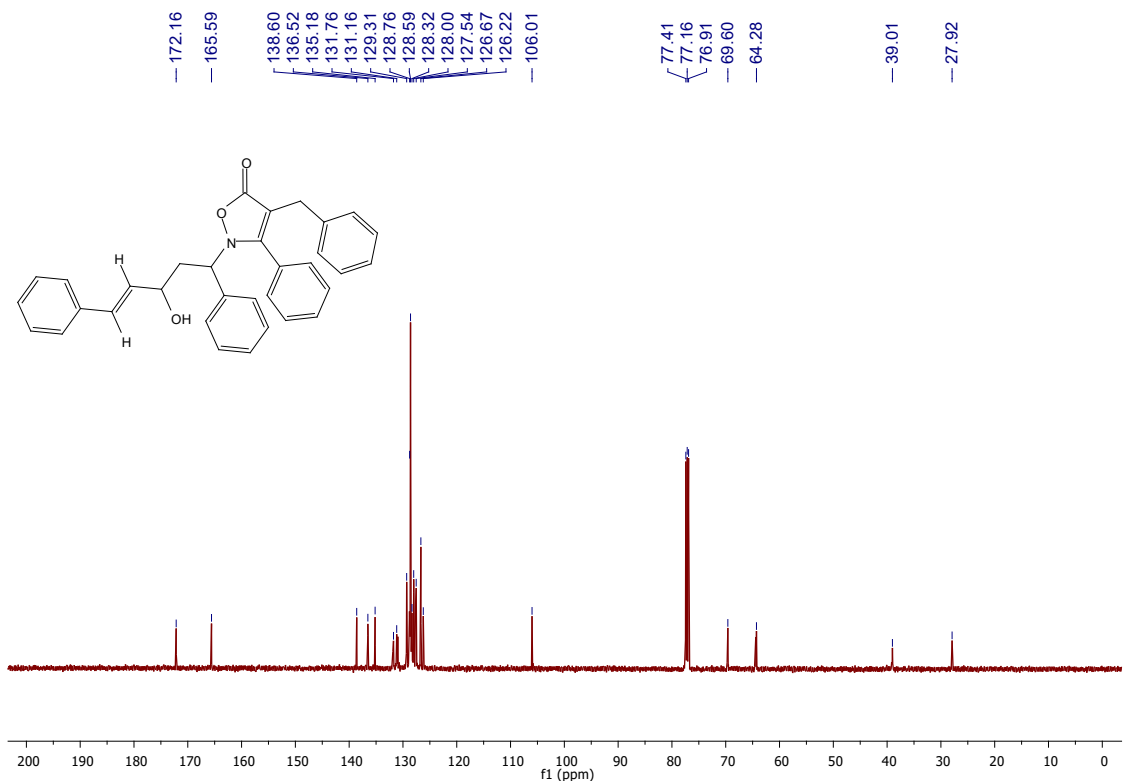

### 3. X-ray measurement

Single crystals of  $C_{33}H_{27}NO_3$  (CCDC 2226174) were crystallized by multisolvent crystallization using a mixture of dichloromethane and hexanes as solvent. The compound (approximately 100 mg) was transferred to a 25 mL Erlenmeyer and added 5 mL of dichloromethane so that the whole sample was diluted then 15 mL of Hexane was added. The mixture was kept at room temperature for several days until small white crystals appeared. A suitable crystal was selected and mounted on a SuperNova, Dual, Cu at home/near, AtlasS2 diffractometer. The crystal was kept at 291.0(5) K during data collection. Using Olex2 [1], the structure was solved with the SHELXT [2] structure solution program using Intrinsic Phasing and refined with the SHELXL [3] refinement package using Least Squares minimization.

[1] Dolomanov, O.V., Bourhis, L.J., Gildea, R.J, Howard, J.A.K. & Puschmann, H. (2009), *J. Appl. Cryst.* 42, 339-341.

[2] Sheldrick, G.M. (2015). *Acta Cryst.* A71, 3-8.

[3] Sheldrick, G.M. (2015). *Acta Cryst.* C71, 3-8.

#### Crystal structure determination

Crystal Data for  $C_{33}H_{27}NO_3$  ( $M = 485.55$  g/mol): triclinic, space group P-1 (no. 2),  $a = 9.7053(4)$  Å,  $b = 9.7576(5)$  Å,  $c = 15.0112(6)$  Å,  $\alpha = 86.996(4)^\circ$ ,  $\beta = 76.122(3)^\circ$ ,  $\gamma = 70.408(4)^\circ$ ,  $V = 1299.56(11)$  Å<sup>3</sup>,  $Z = 2$ ,  $T = 291.0(5)$  K,  $\mu(\text{Cu K}\alpha) = 0.626$  mm<sup>-1</sup>,  $D_{\text{calc}} = 1.241$  g/cm<sup>3</sup>, 8341 reflections measured ( $9.626^\circ \leq 2\theta \leq 135.144^\circ$ ), 4686 unique ( $R_{\text{int}} = 0.0395$ ,  $R_{\text{sigma}} = 0.0385$ ) which were used in all calculations. The final  $R_1$  was 0.0643 ( $I > 2\sigma(I)$ ) and  $wR_2$  was 0.2092 (all data).

#### Refinement model description

Number of restraints - 0, number of constraints - unknown.

Details:

##### 1 Fixed Uiso

At 1.2 times of: All C(H) and C(H,H) groups

At 1.5 times of: All O(H) groups, All O(H,H) groups

2.a Ternary CH refined with riding coordinates: C17(H17)

2.b Secondary CH2 refined with riding coordinates: C10(H10A,H10B), C24(H24A,H24B)

2.c Aromatic/amide H refined with riding coordinates: C5(H5), C7(H7), C6(H6), C19(H19), C26(H26), C27(H27), C20(H20), C12(H12), C13(H13), C9(H9), C8(H8), C21(H21), C22(H22), C23(H23), C14(H14), C30(H30), C15(H15), C29(H29), C16(H16), C32(H32), C33(H33), C31(H31)



Figure S106. Crystal structure fragment of asymmetric unit for compound 3a. The water molecules crystallized from asymmetric unit were omitted to clarity. Ellipsoids are drawn with 25% with probability.

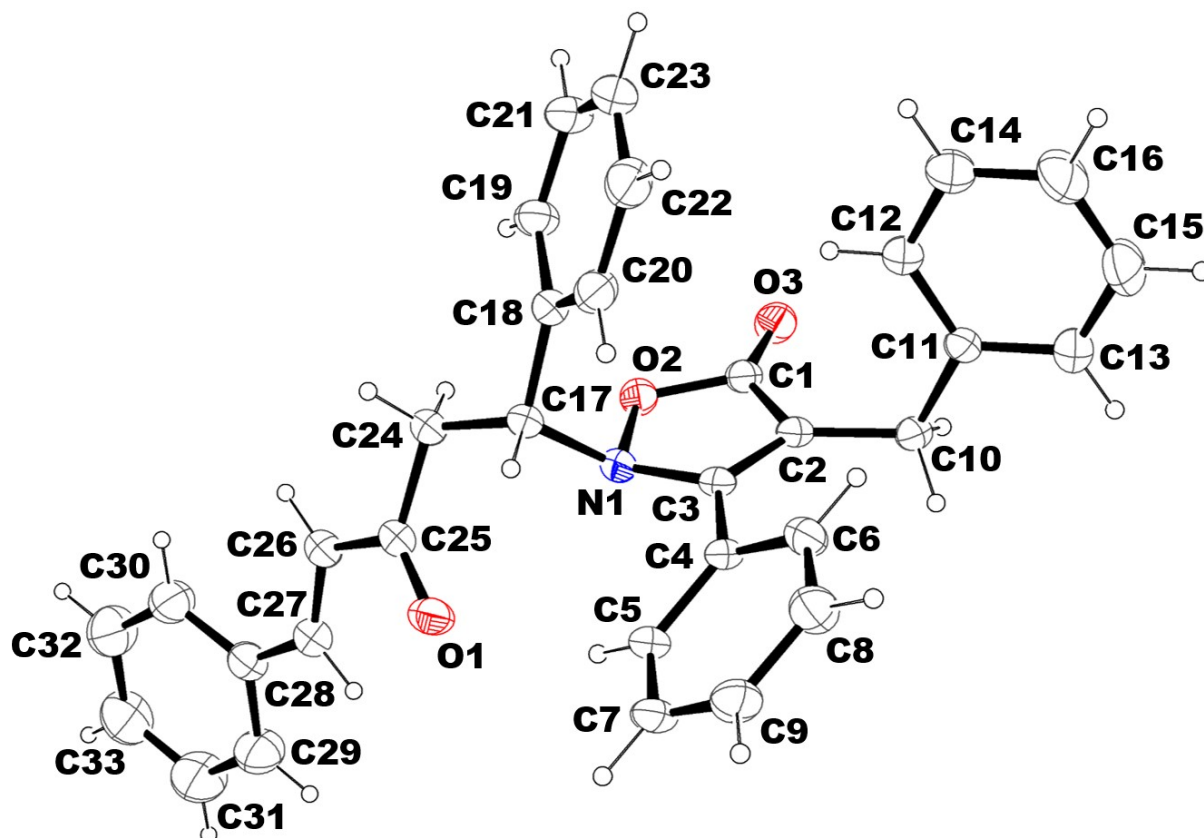

|                  |                                             |
|------------------|---------------------------------------------|
| Diffractometer   | SuperNova, Dual, Cu at home/near,           |
| Radiation Source | AtlasS2Cu K $\alpha$ ( $\lambda$ =1.54184Å) |
| Data Collection  |                                             |
| Collection Notes | CrysAlisPro 1.171.42.63a (Rigaku OD, 2022)  |

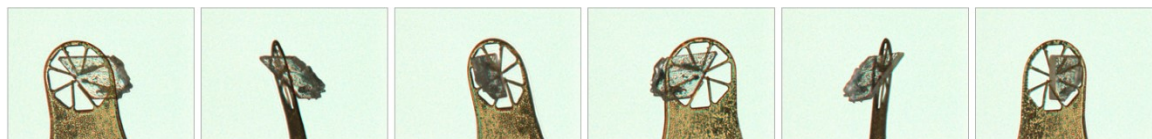

Table S1. Crystal data and structure refinement for compound **3a**.

| Identification code                         | <b>3a</b>                                                             |
|---------------------------------------------|-----------------------------------------------------------------------|
| Empirical formula                           | C <sub>33</sub> H <sub>27</sub> NO <sub>3</sub>                       |
| Chemical_formula_moiety                     | C <sub>33</sub> H <sub>27</sub> NO <sub>3</sub> , 2(H <sub>2</sub> O) |
| Formula weight                              | 485.55                                                                |
| Temperature/K                               | 291.0(5)                                                              |
| Crystal system                              | triclinic                                                             |
| Space group                                 | P-1                                                                   |
| a/Å                                         | 9.7053(4)                                                             |
| b/Å                                         | 9.7576(5)                                                             |
| c/Å                                         | 15.0112(6)                                                            |
| α/°                                         | 86.996(4)                                                             |
| β/°                                         | 76.122(3)                                                             |
| γ/°                                         | 70.408(4)                                                             |
| Volume/Å <sup>3</sup>                       | 1299.56(11)                                                           |
| Z                                           | 2                                                                     |
| ρ <sub>calc</sub> /mg/mm <sup>3</sup>       | 1.241                                                                 |
| μ/mm <sup>-1</sup>                          | 0.626                                                                 |
| F(000)                                      | 512.0                                                                 |
| Crystal size/mm <sup>3</sup>                | 0.503×0.331×0.076                                                     |
| 2θ range for data collection                | 9.626 to 135.144°                                                     |
| Index ranges                                | -9 ≤ h ≤ 11, -11 ≤ k ≤ 11, -10 ≤ l ≤ 17                               |
| Reflections collected                       | 8341                                                                  |
| Independent reflections                     | 4686[R(int) = 0.0395]                                                 |
| Data/restraints/parameters                  | 4686/0/334                                                            |
| Goodness-of-fit on F <sup>2</sup>           | 1.079                                                                 |
| Final R indexes [I ≥ 2σ (I)]                | R1 = 0.0643, wR2 = 0.1991                                             |
| Final R indexes [all data]                  | R1 = 0.0723, wR2 = 0.2092                                             |
| Largest diff. peak/hole / e Å <sup>-3</sup> | 0.23/-0.33                                                            |

Table S2. Bond Lengths for compound **3a**.

| Atom | Atom | Length/Å | Atom | Atom | Length/Å |
|------|------|----------|------|------|----------|
| O2   | N1   | 1.427(2) | C25  | C26  | 1.476(3) |
| O2   | C1   | 1.382(2) | C7   | C9   | 1.380(4) |
| O3   | C1   | 1.206(2) | C6   | C8   | 1.381(3) |
| O1   | C25  | 1.216(3) | C19  | C21  | 1.387(3) |
| N1   | C3   | 1.402(2) | C26  | C27  | 1.327(3) |
| N1   | C17  | 1.494(2) | C27  | C28  | 1.459(3) |
| C3   | C2   | 1.358(3) | C20  | C22  | 1.390(4) |
| C3   | C4   | 1.467(3) | C12  | C14  | 1.370(4) |
| C2   | C10  | 1.495(3) | C28  | C30  | 1.375(4) |
| C2   | C1   | 1.438(3) | C28  | C29  | 1.392(4) |
| C4   | C5   | 1.402(3) | C13  | C15  | 1.375(4) |
| C4   | C6   | 1.391(3) | C9   | C8   | 1.384(4) |
| C18  | C17  | 1.517(3) | C21  | C23  | 1.364(5) |
| C18  | C19  | 1.391(3) | C22  | C23  | 1.375(5) |
| C18  | C20  | 1.383(3) | C14  | C16  | 1.371(5) |
| C10  | C11  | 1.513(3) | C30  | C32  | 1.373(4) |
| C17  | C24  | 1.525(3) | C15  | C16  | 1.369(5) |
| C5   | C7   | 1.380(3) | C29  | C31  | 1.378(5) |
| C11  | C12  | 1.384(3) | C32  | C33  | 1.373(5) |
| C11  | C13  | 1.383(3) | C33  | C31  | 1.366(6) |
| C25  | C24  | 1.509(3) |      |      |          |

Table S3. Bond Angles for compound **3a**.

| Atom | Atom | Atom | Angle/°    | Atom | Atom | Atom | Angle/°    |
|------|------|------|------------|------|------|------|------------|
| C1   | O2   | N1   | 108.22(13) | O1   | C25  | C26  | 121.25(19) |
| O2   | N1   | C17  | 107.89(13) | C26  | C25  | C24  | 116.80(18) |
| C3   | N1   | O2   | 106.24(14) | C25  | C24  | C17  | 113.39(16) |
| C3   | N1   | C17  | 119.60(16) | C9   | C7   | C5   | 120.6(2)   |
| N1   | C3   | C4   | 118.97(16) | C8   | C6   | C4   | 120.2(2)   |
| C2   | C3   | N1   | 110.35(17) | C21  | C19  | C18  | 120.5(2)   |
| C2   | C3   | C4   | 130.55(17) | C27  | C26  | C25  | 120.2(2)   |
| C3   | C2   | C10  | 130.56(18) | C26  | C27  | C28  | 128.7(2)   |
| C3   | C2   | C1   | 107.30(16) | C18  | C20  | C22  | 120.5(2)   |
| C1   | C2   | C10  | 122.11(17) | C14  | C12  | C11  | 121.2(2)   |
| C5   | C4   | C3   | 120.49(18) | C30  | C28  | C29  | 117.4(3)   |
| C6   | C4   | C3   | 120.45(17) | C30  | C28  | C27  | 123.8(2)   |
| C6   | C4   | C5   | 119.05(19) | C29  | C28  | C27  | 118.6(2)   |
| C19  | C18  | C17  | 121.74(19) | C15  | C13  | C11  | 120.9(2)   |
| C20  | C18  | C17  | 119.69(18) | C7   | C9   | C8   | 119.7(2)   |
| C20  | C18  | C19  | 118.45(19) | C6   | C8   | C9   | 120.4(2)   |
| C2   | C10  | C11  | 114.81(15) | C23  | C21  | C19  | 120.4(3)   |
| N1   | C17  | C18  | 110.70(15) | C23  | C22  | C20  | 120.2(3)   |
| N1   | C17  | C24  | 108.34(17) | C21  | C23  | C22  | 119.9(2)   |
| C18  | C17  | C24  | 114.62(15) | C12  | C14  | C16  | 120.4(2)   |
| O2   | C1   | C2   | 107.71(16) | C32  | C30  | C28  | 121.3(3)   |
| O3   | C1   | O2   | 119.47(18) | C16  | C15  | C13  | 120.5(3)   |
| O3   | C1   | C2   | 132.81(19) | C31  | C29  | C28  | 121.0(3)   |
| C7   | C5   | C4   | 120.0(2)   | C15  | C16  | C14  | 119.2(3)   |
| C12  | C11  | C10  | 122.44(18) | C30  | C32  | C33  | 120.8(3)   |
| C13  | C11  | C10  | 119.84(17) | C31  | C33  | C32  | 118.9(3)   |
| C13  | C11  | C12  | 117.7(2)   | C33  | C31  | C29  | 120.6(3)   |
| O1   | C25  | C24  | 121.9(2)   | C41  | C43  | C13  | 120.5(2)   |

Table S4. Hydrogen Bonds for compound **3a**.

| <b>D</b> | <b>H</b> | <b>A</b>          | <b>d(D-H)/Å</b> | <b>d(H-A)/Å</b> | <b>d(D-A)/Å</b> | <b>D-H-A/°</b> |
|----------|----------|-------------------|-----------------|-----------------|-----------------|----------------|
| C10      | H10A     | O3 <sup>i</sup>   | 0.97            | 2.565           | 3.442(3)        | 150.4          |
| C10      | H10B     | O1 <sup>ii</sup>  | 0.97            | 2.693           | 3.577(2)        | 151.7          |
| C19      | H19      | O2 <sup>iii</sup> | 0.93            | 2.587           | 3.476(2)        | 160.2          |

(i) -X,-Y,1-Z; (ii) -X,1-Y,1-Z e (iii) 1-X,-Y,1-Z.

## 4. Control experiments

### 4.1. Reaction with DCI

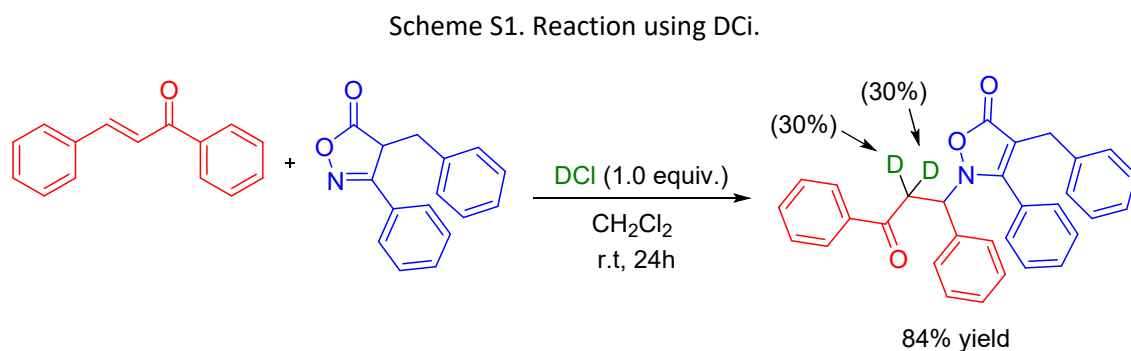

General procedure: In a 5.0 mL vial, 1.5 mL of dichloromethane was added. Then, 0.20 mmol (1.0 equiv.) of isoxazol-5-one **2a** and 0.20 mmol (1.0 equiv.) of chalcone were added. After 5 minutes under magnetic stirring, 0.20 mmol (1.0 equiv.) of DCI was added. The reaction mixture was maintained under magnetic stirring at room temperature for 24 hours. Then, the crude reaction mixture was transferred to a round bottom flask, the solvent was removed under reduced pressure, and the product was purified by column chromatography.

Figure S107.  $^1\text{H}$  NMR (500 MHz,  $\text{CDCl}_3$ ) of product **3r** with 60% deuterium incorporation

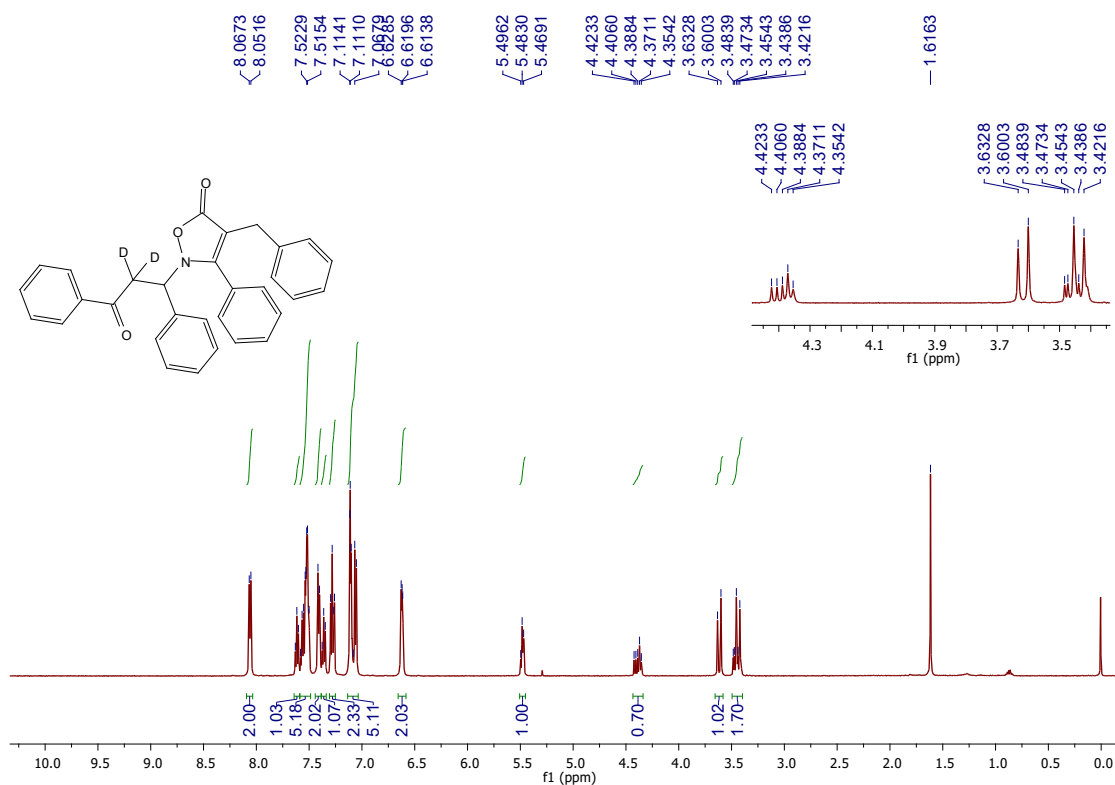

## 4.2. Competition experiment between DCl and CX4SO<sub>3</sub>H

Scheme S2. Competition reaction between DCl and CX4SO<sub>3</sub>H

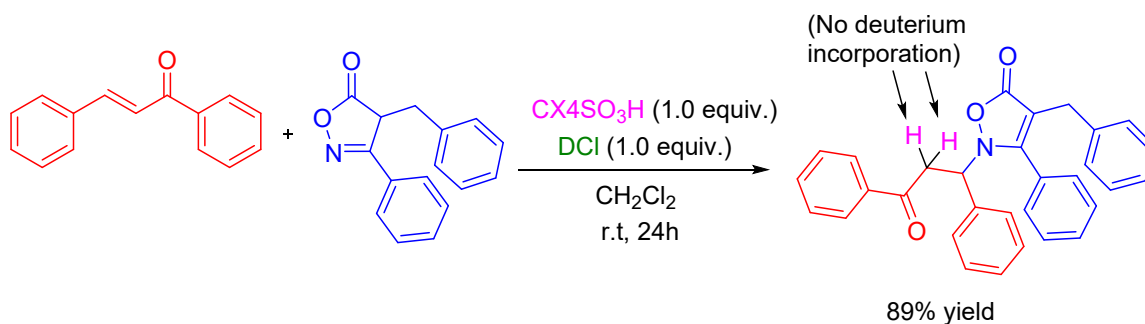

In a 5.0 mL vial, 1.5 mL of dichloromethane was added. Then, 0.20 mmol (1.0 equiv.) of intermediate **2a** and 0.20 mmol (1.0 equiv.) of chalcone were added. After 5 minutes under magnetic stirring, 0.20 mmol (1.0 equiv.) of DCl and 0.20 mmol (1.0 equiv.) of calix[4]arene *p*-sulfonic acid (CX<sub>4</sub>SO<sub>3</sub>H) were added. The reaction mixture was maintained under magnetic stirring at room temperature for 24 hours. Then, the crude reaction mixture was transferred to a round bottom flask, the solvent was removed under reduced pressure, and the product was purified by column chromatography.

Figure S107. <sup>1</sup>H NMR (500 MHz, CDCl<sub>3</sub>) of product **3r** obtained in the competition experiment between DCl and CX<sub>4</sub>SO<sub>3</sub>H

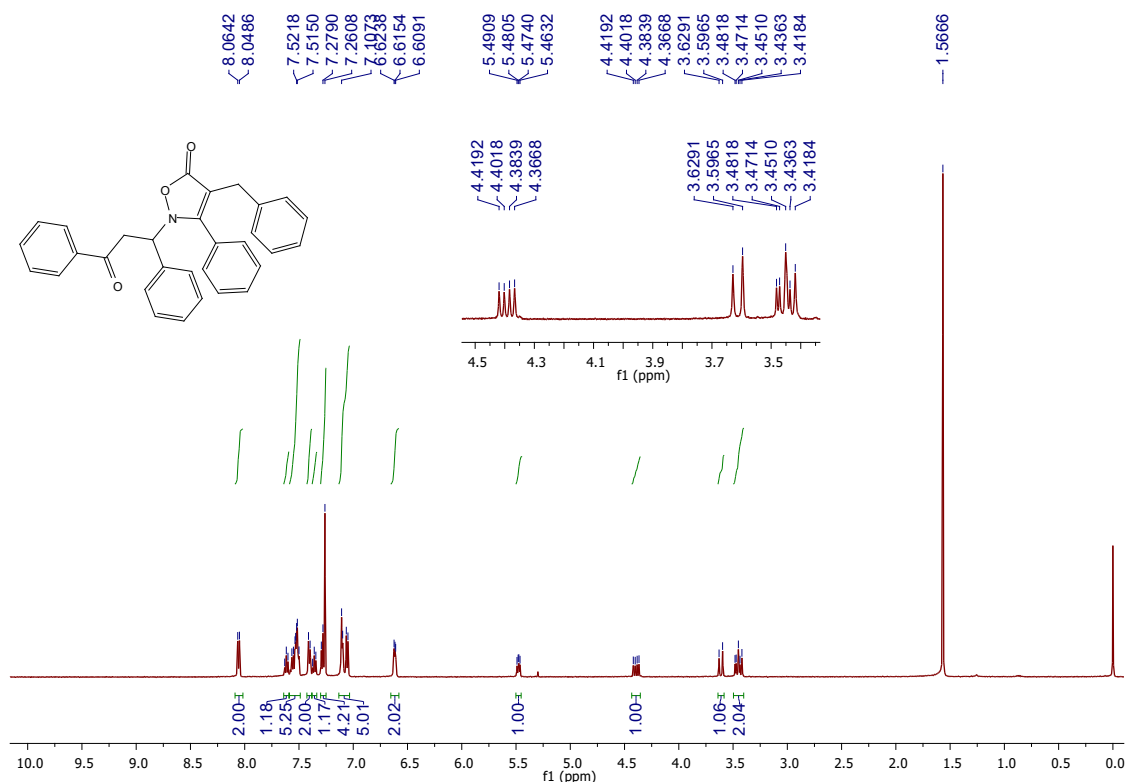

## 5. General procedure for the synthesis of *p*-sulfonic acid calix[4]arene (CX<sub>4</sub>SO<sub>3</sub>H)

The *p*-sulfonic acid calix[4]arene was synthesized according to the methodologies described by Gustche et al. [1] and Shinkai et al. [2] First, the synthesis of *p*-tert-butylcalix[4]arene was performed using *p*-tert-butylphenol, formaldehyde solution (37%), sodium hydroxide, and heating at 110 °C for four hours. After this period, diphenyl ether was added, and a white precipitate of *p*-tert-butyl calix[4]arene was obtained in 55% yield. The *p*-sulfonic acid calix[4]arene was obtained by treating *p*-tert-butyl calix[4]arene with concentrated H<sub>2</sub>SO<sub>4</sub> at 100 °C for 4 hours with 78% yield.

[1] Gutsche, C. D.; Iqbal, M. *Organic Syntheses* **1990**, 68, 234-235, doi: 10.15227/orgsyn.068.0234.

[2] Shinkai, S.; Mori, S.; Tsubaki, T.; Sone, T.; Manabe, O. *Tetrahedron Lett.* **1984**, 25, 5315–5318, doi: 10.1016/S0040-4039(01)81592-6.

### 5.1. NMR and IR spectra of CX<sub>4</sub>SO<sub>3</sub>H

<sup>1</sup>H NMR (300 MHz; D<sub>2</sub>O; δ<sub>H<sub>2</sub>O</sub> 4,67; 25 °C) δ 3.88 (s, 8H, H-4), 7.42 (s, 8H, H-2).

<sup>13</sup>C NMR (75 MHz; D<sub>2</sub>O; 25 °C) δ 32.0 (C-4), 126.1 (C-3), 130.7 (C-2), 133.7 (C-1), 155.9 (C-5).

Figure S108. IR (ATR) of *p*-sulfonic acid calix[4]arene (CX<sub>4</sub>SO<sub>3</sub>H)

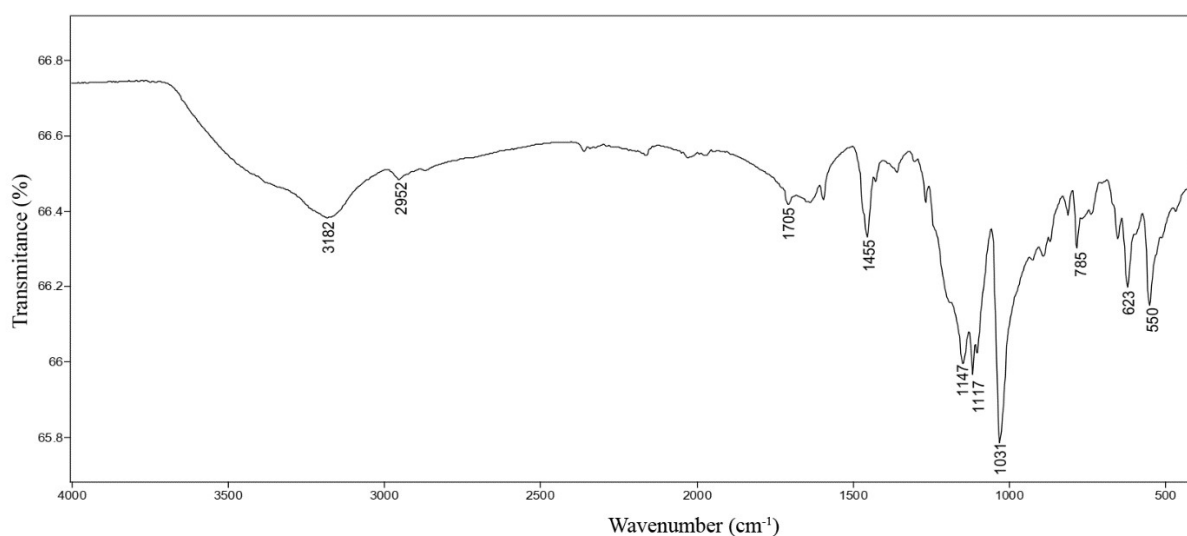



Figure S109.  $^1\text{H}$  NMR (300 MHz,  $\text{D}_2\text{O}$ ) of *p*-sulfonic acid calix[4]arene ( $\text{CX}_4\text{SO}_3\text{H}$ ).

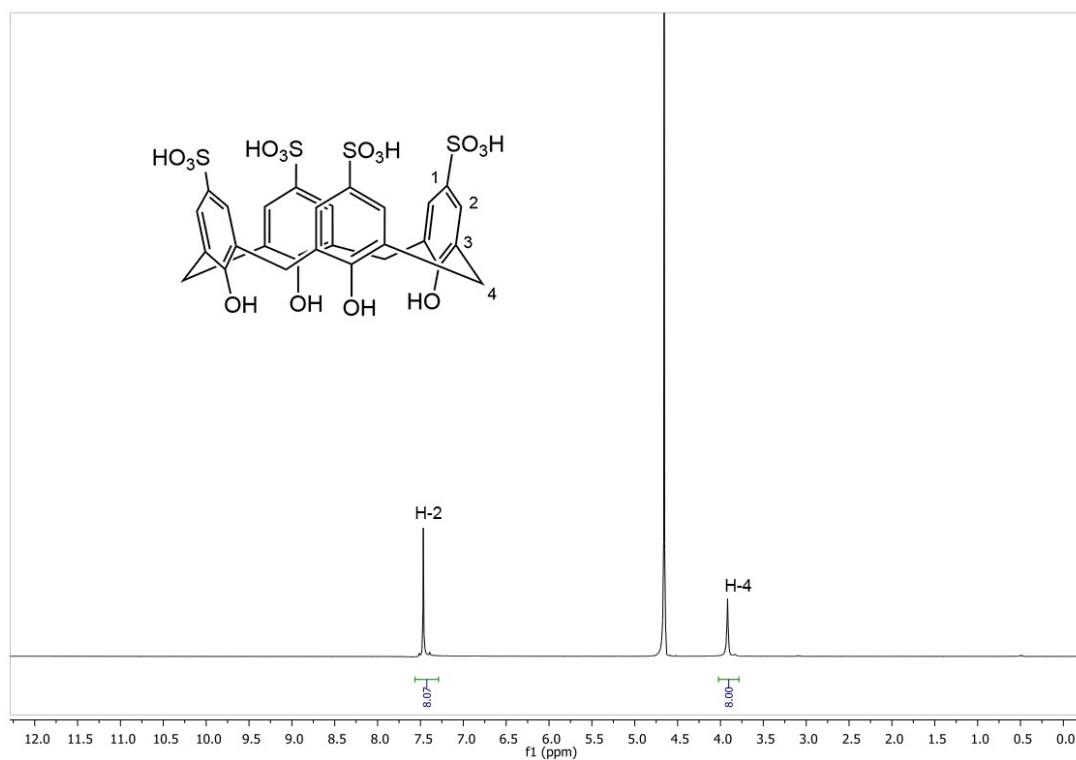

Figure S110.  $^{13}\text{C}$  { $^1\text{H}$ } NMR (75,459 MHz,  $\text{D}_2\text{O}$ ) of *p*-sulfonic acid calix[4]arene ( $\text{CX}_4\text{SO}_3\text{H}$ ).

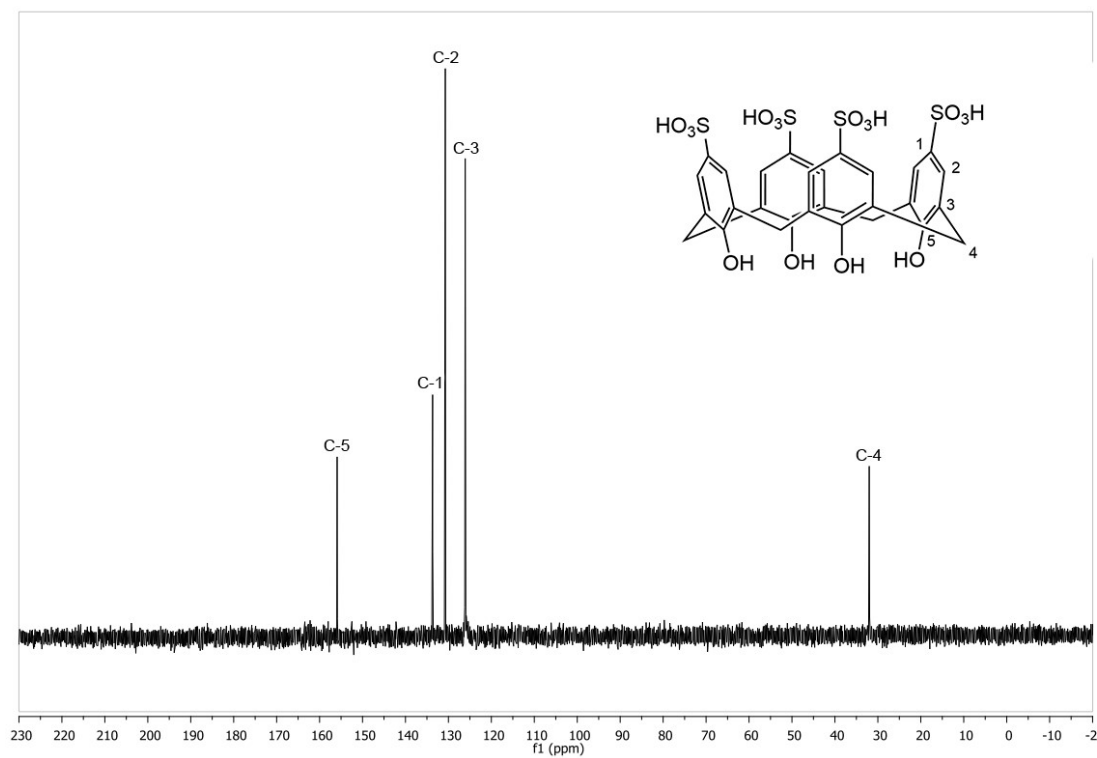

## 6. Energy profile of the evaluated mechanisms

Figure S111. Energy profile ( $\Delta G$ ) for the first reaction pathway

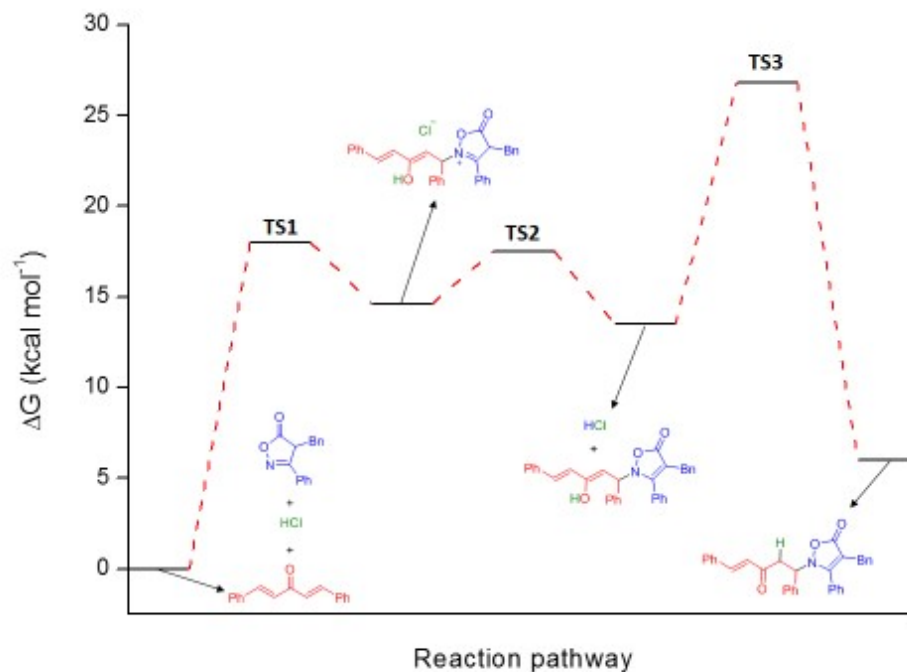

Figure S112. Energy profile ( $\Delta G$ ) for the second reaction pathway

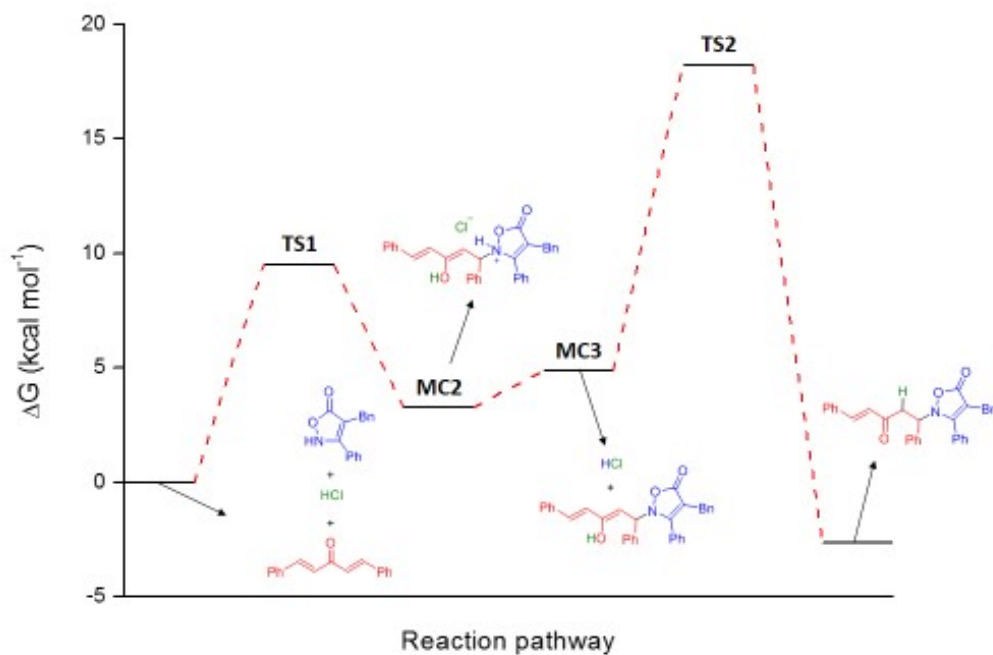

Note: The conversion of the molecular complex 2 (MC2) into the molecular complex 3 (MC3) is barrierless (the barrier is lower than  $kT$ , in which  $k$  is the Boltzmann constant and  $T$  is the temperature). This observation was confirmed by the scan analysis of the acid-base reaction involved in this step.

Figure S113. Energy profile ( $\Delta G$ ) for the third reaction pathway

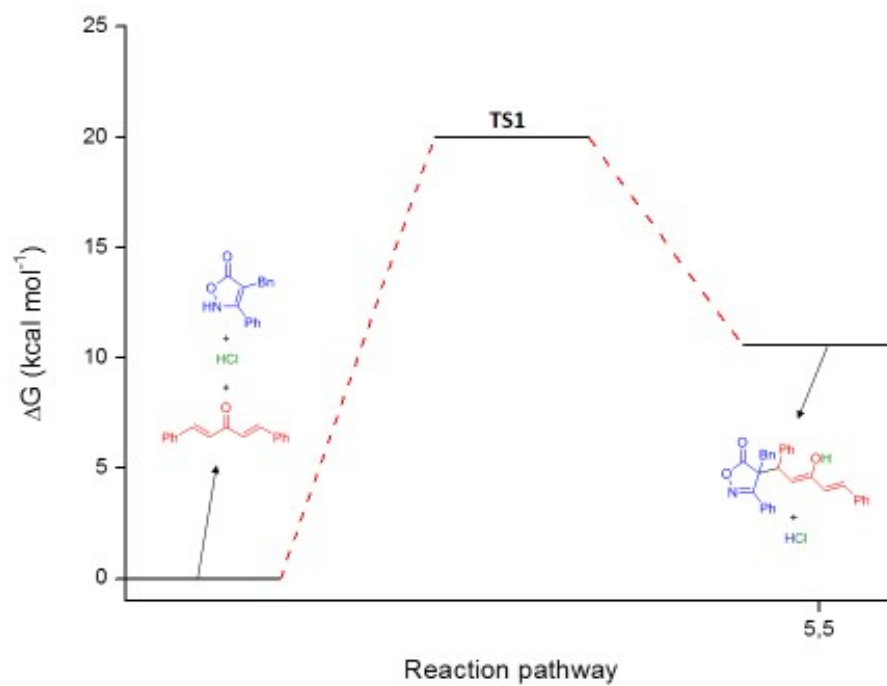

## 7. Imaginary frequencies for all transition states and intrinsic reaction coordinates

Table S5. Imaginary frequencies of TS structures

| Reaction pathway |                                 | Frequency (cm <sup>-1</sup> ) |
|------------------|---------------------------------|-------------------------------|
| <b>1</b>         | <b>Transition state 1 (TS1)</b> | -327.67                       |
|                  | <b>Transition state 2 (TS2)</b> | -616.85                       |
|                  | <b>Transition state 3 (TS3)</b> | -768.49                       |
| <b>2</b>         | <b>Transition state 1 (TS1)</b> | -226.36                       |
|                  | <b>Transition state 3 (TS3)</b> | -768.49                       |
| <b>3</b>         | <b>Transition state 1 (TS1)</b> | -336.73                       |

## 8. Electronic energies (E), Enthalpies (H) and Gibbs free energies (G) of all optimized structures

**Note:** All energies values presented below are expressed in Hartree. The energies were calculated using M06-2X/6-31++G(d,p)/SMD= diethyl ether//M06-2X/6-31G(d) level of theory.

Table S6. Electronic energies (E), Enthalpies (H) and Gibbs free energies (G) for reaction pathway 1.

|               |                            | <b>E</b>     | <b>H</b>     | <b>G</b>     |
|---------------|----------------------------|--------------|--------------|--------------|
| <b>Step 1</b> | <b>Molecular complex 1</b> | -2014.401357 | -2013.836383 | -2013.941961 |
|               | <b>Transition state 1</b>  | -2014.376536 | -2013.811247 | -2013.913294 |
|               | <b>Molecular complex 2</b> | -2014.382997 | -2013.815774 | -2013.918675 |
| <b>Step 2</b> | <b>Molecular complex 3</b> | -2014.387102 | -2013.819632 | -2013.921388 |
|               | <b>Transition state 2</b>  | -2014.375621 | -2013.813639 | -2013.916768 |
|               | <b>Molecular complex 4</b> | -2014.380469 | -2013.815713 | -2013.923165 |
| <b>Step 3</b> | <b>Molecular complex 5</b> | -2014.386734 | -2013.82147  | -2013.929386 |
|               | <b>Transition state 3</b>  | -2014.369424 | -2013.807392 | -2013.908155 |
|               | <b>Molecular complex 6</b> | -2014.404071 | -2013.838731 | -2013.941344 |

Table S7. Electronic energies (E), Enthalpies (H) and Gibbs free energies (G) for reaction pathway 2.

|               |                            | <b>E</b>     | <b>H</b>     | <b>G</b>     |
|---------------|----------------------------|--------------|--------------|--------------|
| <b>Step 1</b> | <b>Molecular complex 1</b> | -2014.400151 | -2013.834461 | -2013.93719  |
|               | <b>Transition state 1</b>  | -2014.38478  | -2013.819741 | -2013.922058 |
|               | <b>Molecular complex 2</b> | -2014.393422 | -2013.82783  | -2013.931945 |
| <b>Step 3</b> | <b>Molecular complex 3</b> | -2014.386734 | -2013.82147  | -2013.929386 |
|               | <b>Transition state 2</b>  | -2014.369424 | -2013.807392 | -2013.908155 |
|               | <b>Molecular complex 4</b> | -2014.404071 | -2013.838731 | -2013.941344 |

Table S8. Electronic energies (E), Enthalpies (H) and Gibbs free energies (G) for reaction pathway 3.

|               |                            | <b>E</b>     | <b>H</b>     | <b>G</b>     |
|---------------|----------------------------|--------------|--------------|--------------|
| <b>Step 1</b> | <b>Molecular complex 1</b> | -2014.397744 | -2013.832224 | -2013.934647 |
|               | <b>Transition state 1</b>  | -2014.366695 | -2013.802082 | -2013.902815 |
|               | <b>Molecular complex 2</b> | -2014.377691 | -2013.813078 | -2013.917818 |

## 9. Electronic energies ( $\Delta E$ ), enthalpies ( $\Delta H$ ) and Gibbs free energies ( $\Delta G$ ) variation along each reaction step

**Note:** All energies values presented below are expressed in kcal mol<sup>-1</sup>. The energies were calculated using M06-2X/6-31++G(d,p)/SMD= diethyl ether//M06-2X/6-31G(d) level of theory.

Table S9. Electronic energies ( $\Delta E$ ), Enthalpies ( $\Delta H$ ) and Gibbs free energies ( $\Delta G$ ) for reaction pathway 1.

|        |                     | $\Delta E$ | $\Delta H$ | $\Delta G$ |
|--------|---------------------|------------|------------|------------|
| Step 1 | Molecular complex 1 | 0.00       | 0.00       | 0.00       |
|        | Transition state 1  | 15,58      | 15,77      | 17,99      |
|        | Molecular complex 2 | 11,52      | 12,93      | 14,61      |
| Step 2 | Molecular complex 3 | 0.00       | 0.00       | 0.00       |
|        | Transition state 2  | 7,20       | 3,76       | 2,90       |
|        | Molecular complex 4 | 4,16       | 2,46       | -1,12      |
| Step 3 | Molecular complex 5 | 0.00       | 0.00       | 0.00       |
|        | Transition state 3  | 10,86      | 8,83       | 13,32      |
|        | Molecular complex 6 | -10,88     | -10,83     | -7,50      |

Table S10. Electronic energies ( $\Delta E$ ), Enthalpies ( $\Delta H$ ) and Gibbs free energies ( $\Delta G$ ) for reaction pathway 2.

|        |                     | $\Delta E$ | $\Delta H$ | $\Delta G$ |
|--------|---------------------|------------|------------|------------|
| Step 1 | Molecular complex 1 | 0.00       | 0.00       | 0.00       |
|        | Transition state 1  | 9.65       | 9.24       | 9.50       |
|        | Molecular complex 2 | 4.22       | 4.16       | 3.29       |
| Step 3 | Molecular complex 5 | 0.00       | 0.00       | 0.00       |
|        | Transition state 3  | 10,86      | 8,83       | 13,32      |
|        | Molecular complex 6 | -10,88     | -10,83     | -7,50      |

Table S11. Electronic energies ( $\Delta E$ ), Enthalpies ( $\Delta H$ ) and Gibbs free energies ( $\Delta G$ ) for reaction pathway 3.

|        |                     | $\Delta E$ | $\Delta H$ | $\Delta G$ |
|--------|---------------------|------------|------------|------------|
| Step 1 | Molecular complex 1 | 0.00       | 0.00       | 0.00       |
|        | Transition state 1  | 19.48      | 18.91      | 19.97      |
|        | Molecular complex 2 | 12.58      | 12.01      | 10.56      |

## 10. Images of all optimized structures and selected bond lengths

Figure S114. Molecular complex 1 (reaction pathway 1)

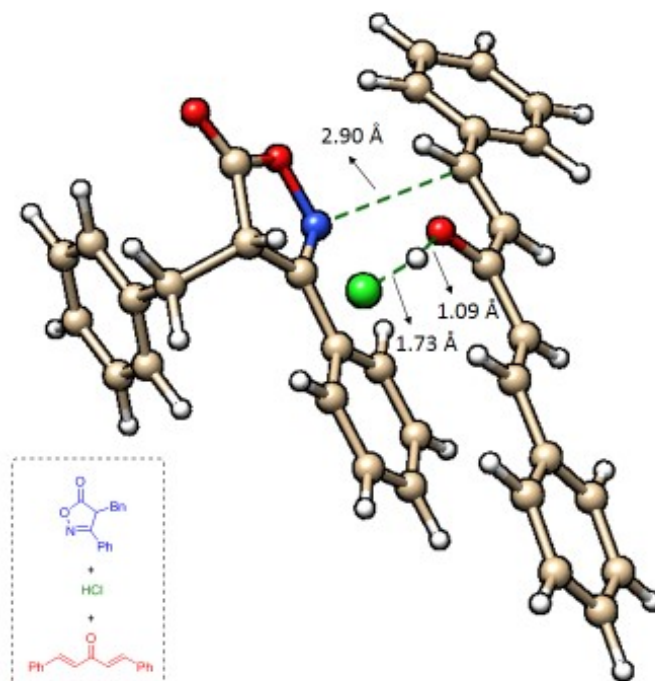

Figure S115. Transition State 1 (TS1) (reaction pathway 1)

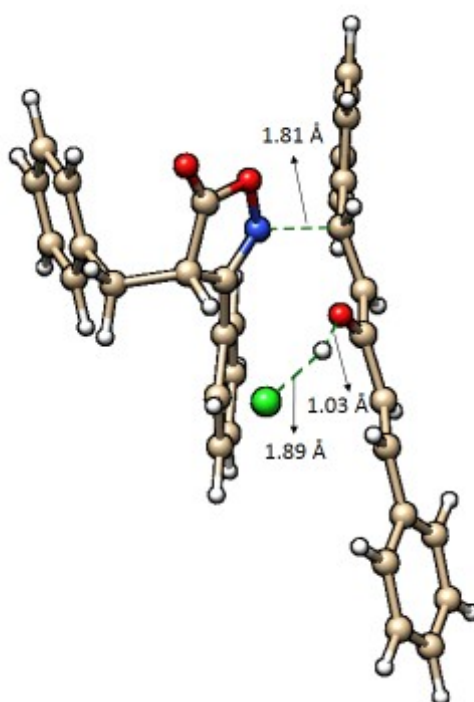

Figure S116. Molecular complex 2 (reaction pathway 1)

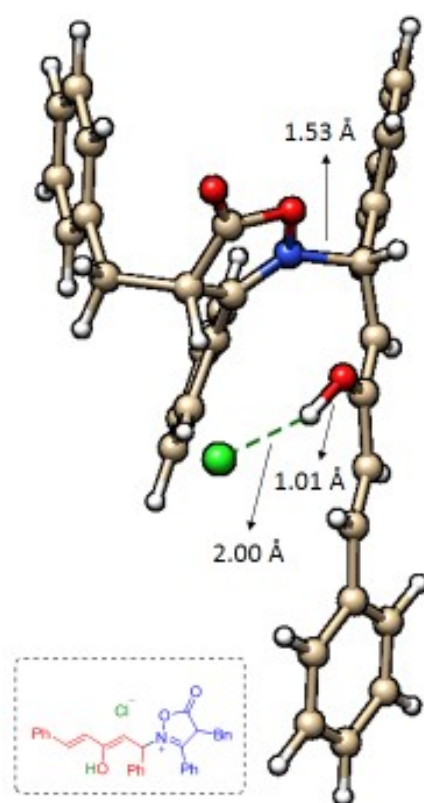

Figure S117. Molecular complex 3 (reaction pathway 1)

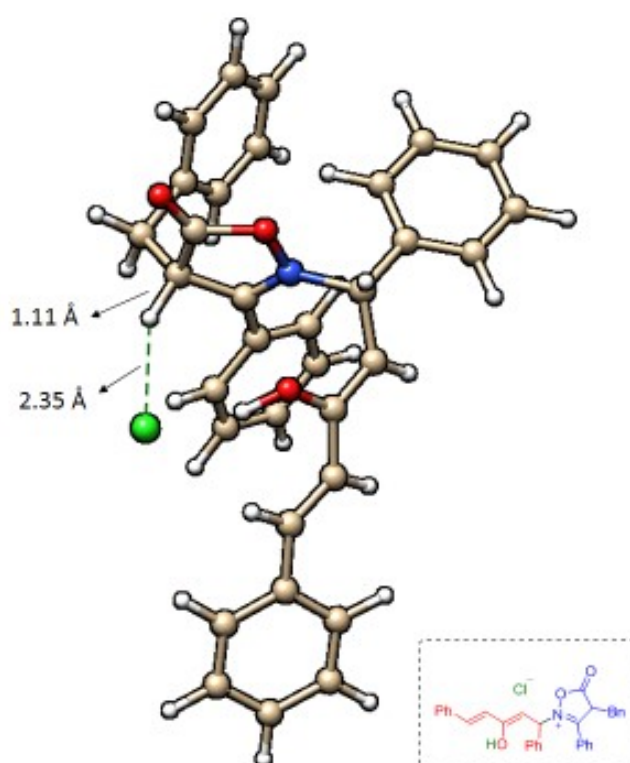



Figure S118. Transition State 2 (TS2) (reaction pathway 1)

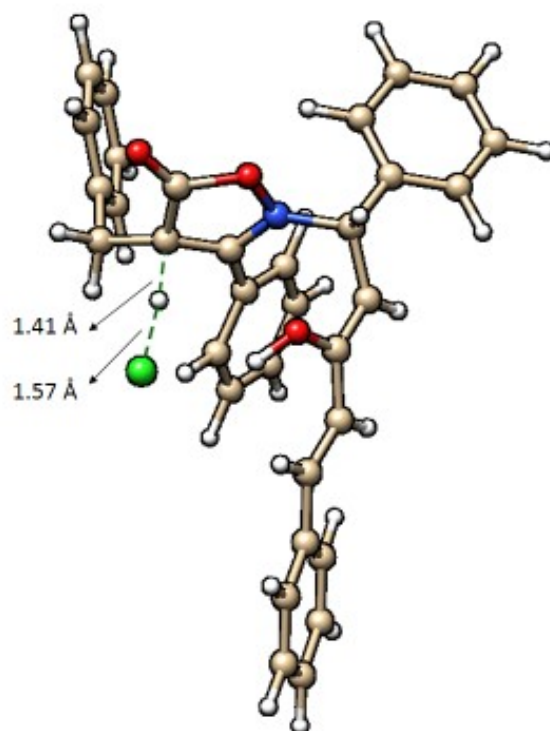

Figure S119. Molecular complex 4 (reaction pathway 1)

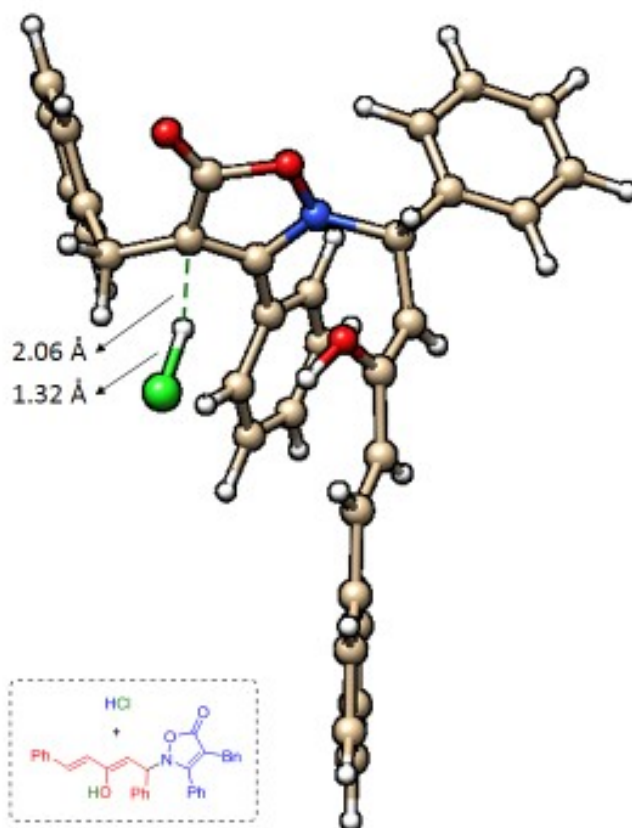

Figure S120. Molecular complex 5 (reaction pathway 1)

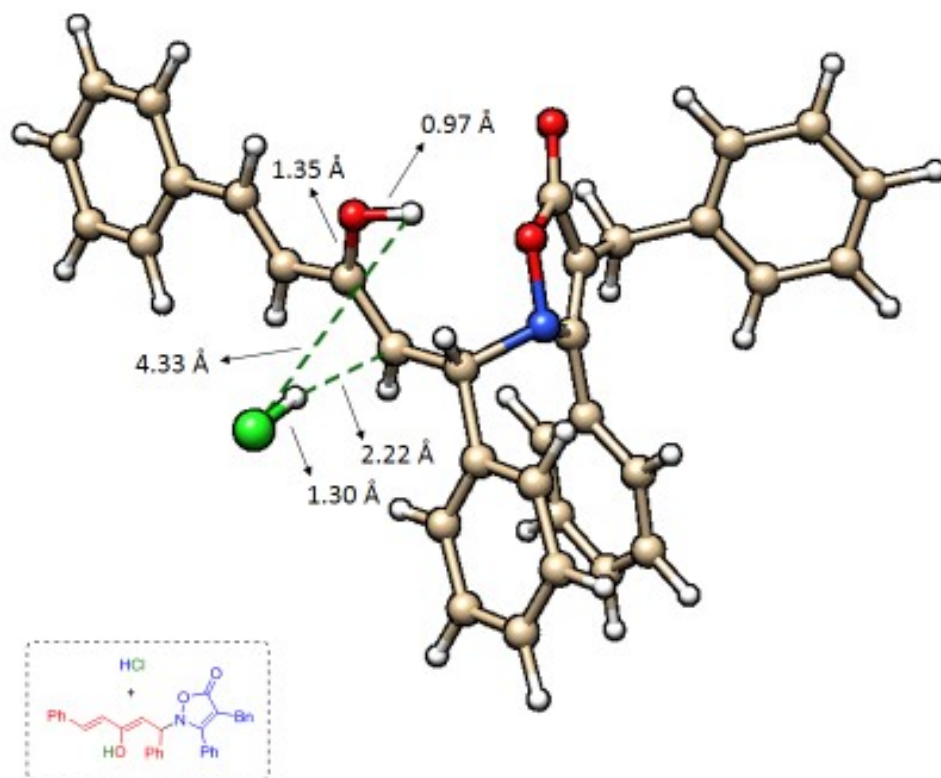

Figure S121. Transition State 3 (TS3) (reaction pathway 1)

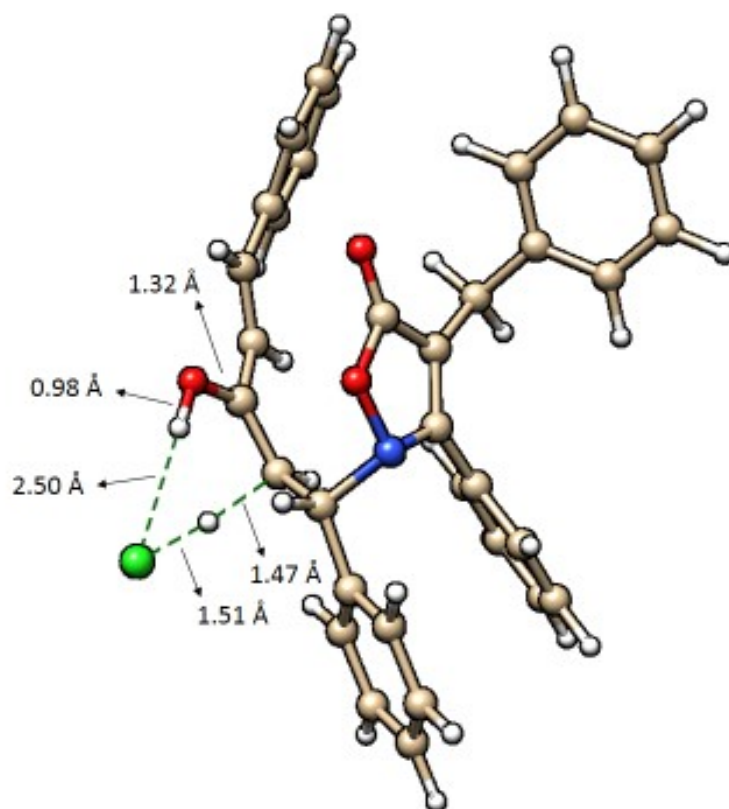

Figure S122. Molecular complex 6 (reaction pathway 1)

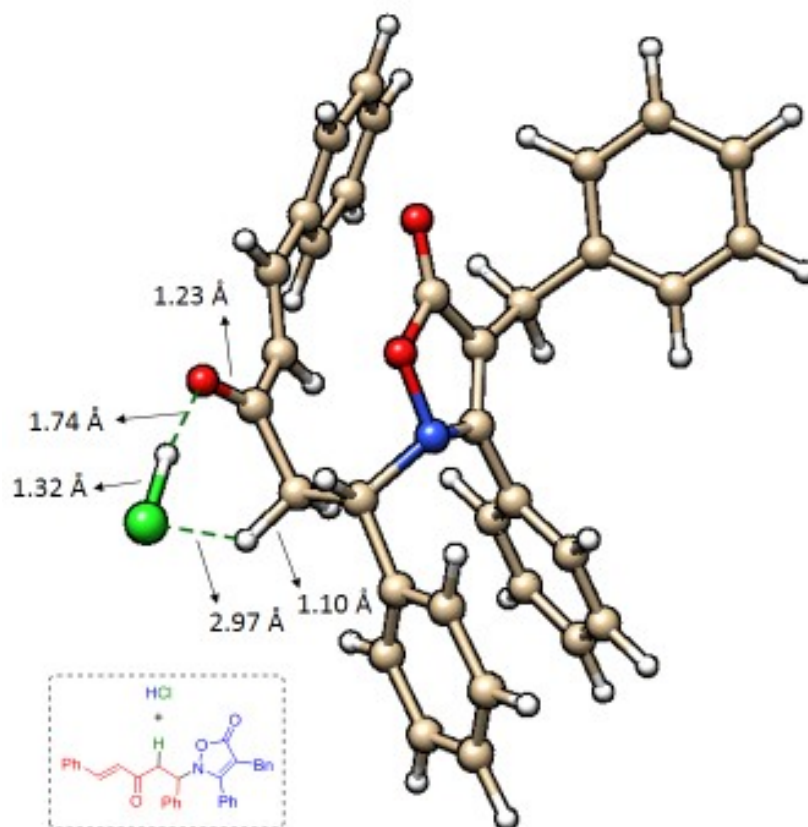

Figure S123. Molecular complex 1 (reaction pathway 2)

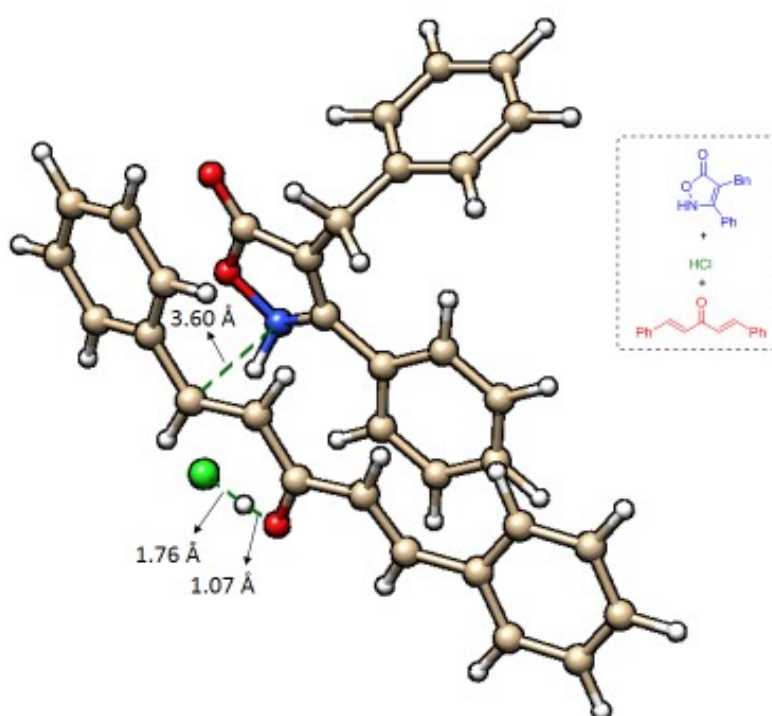

Figure S124. Transition State 1 (TS1) (reaction pathway 2)

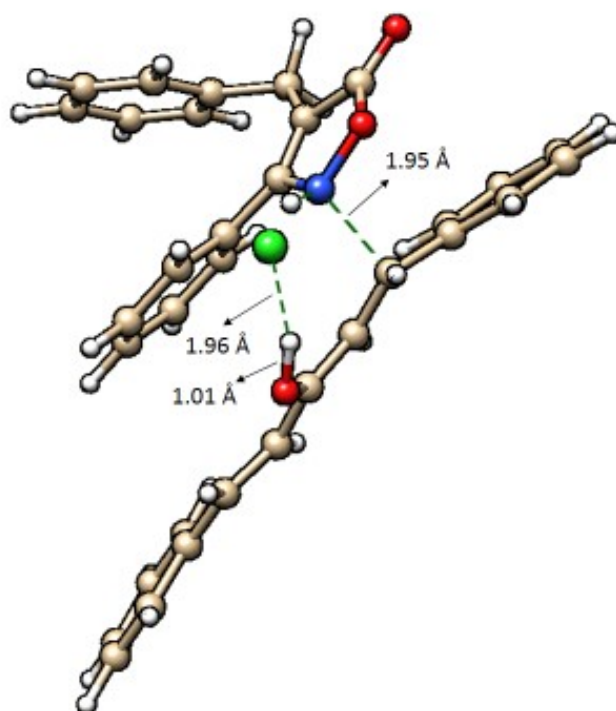

Figure S125. Molecular complex 2 (reaction pathway 2)

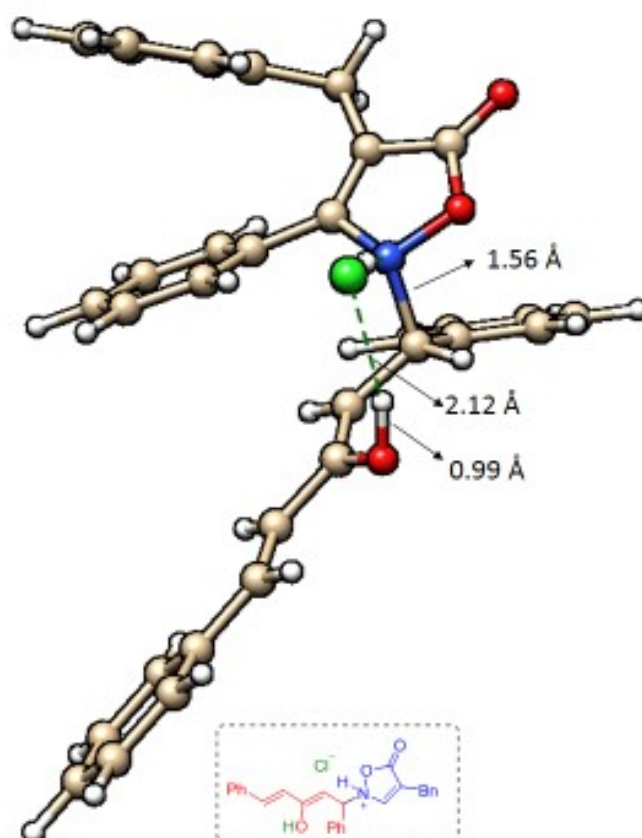

Figure S126. Molecular complex 3 (reaction pathway 2)

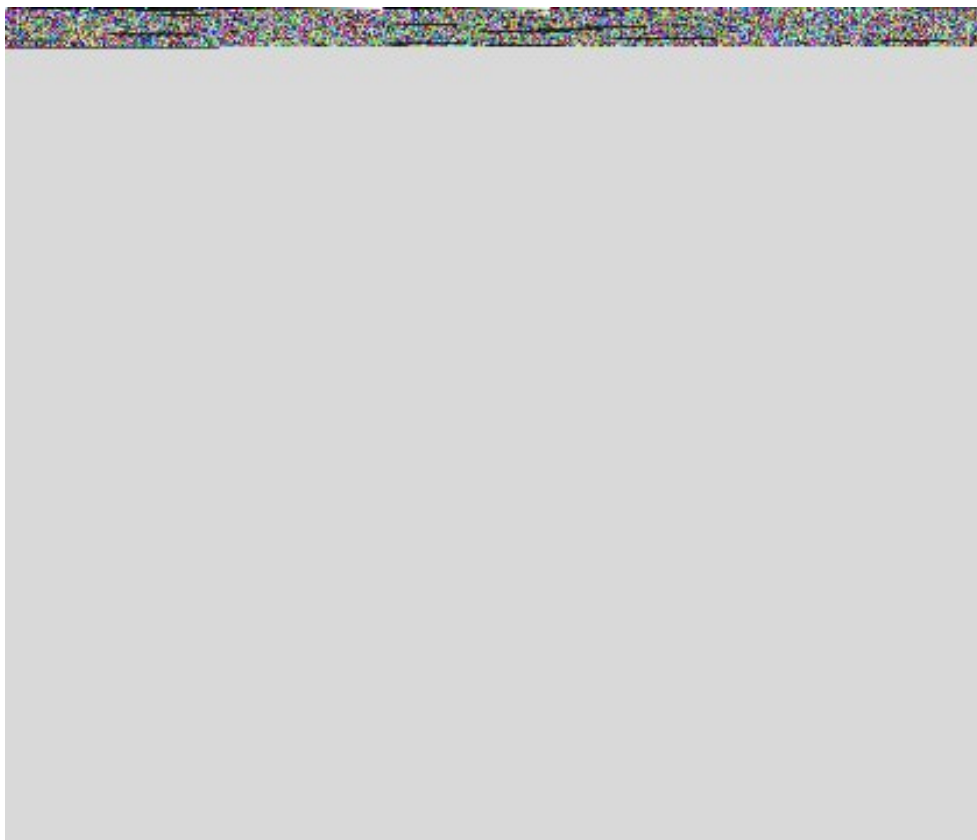

Figure S127. Transition State 2 (TS2) (reaction pathway 2)

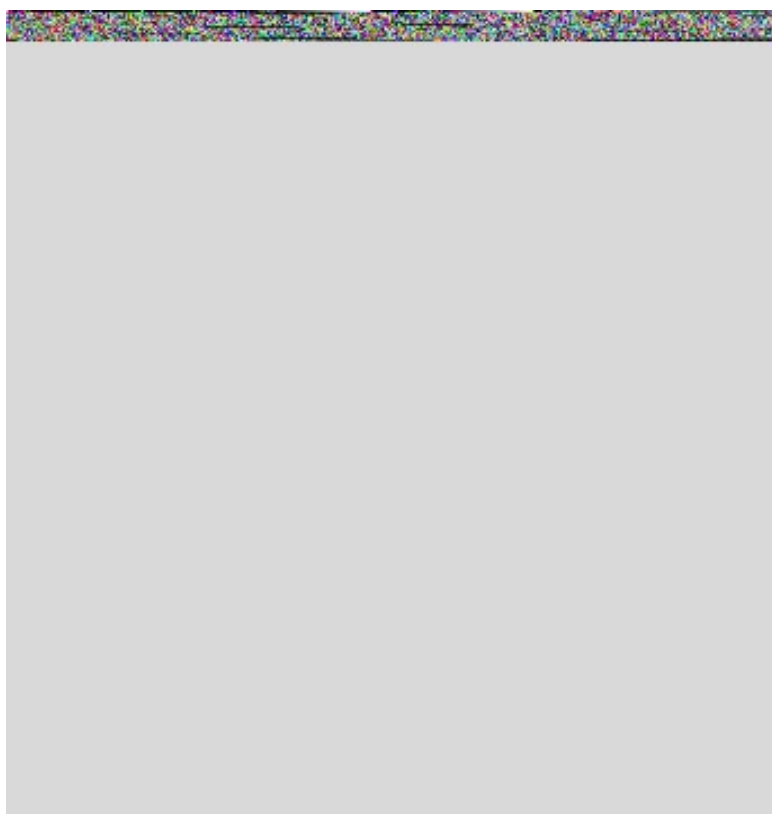

Figure S128. Molecular complex 4 (reaction pathway 2)

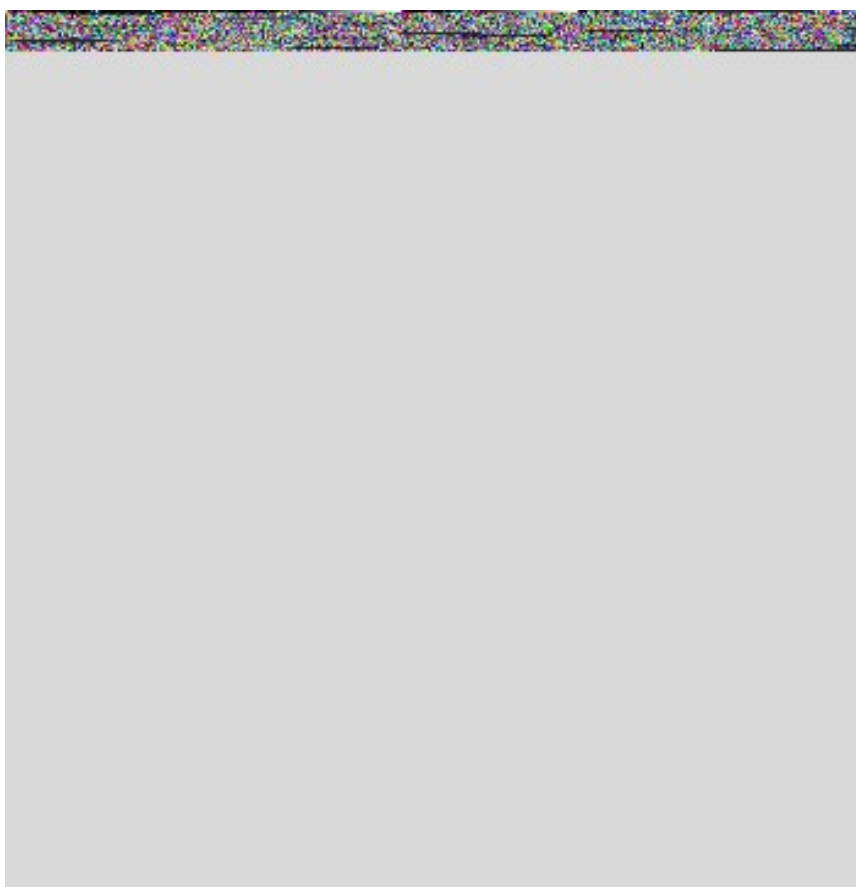

Figure S129. Molecular complex 1 (reaction pathway 3)

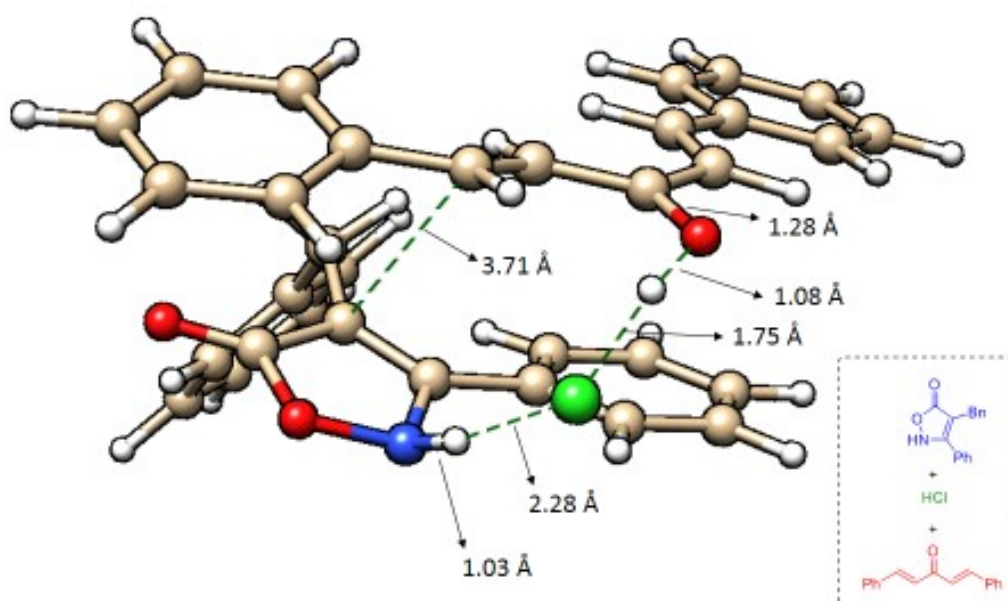

Figure S130. Transition State 1 (TS1) (reaction pathway 3)

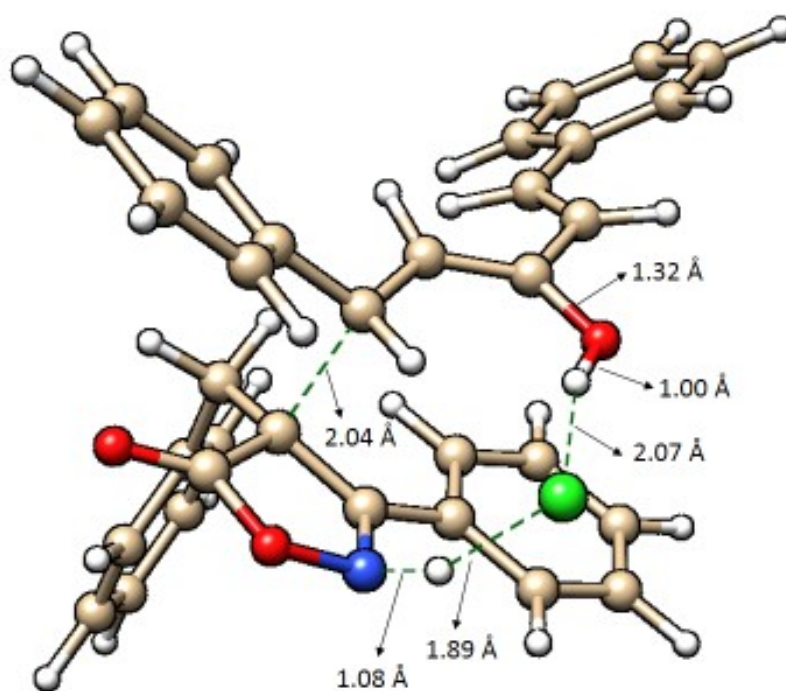

Figure S131. Molecular complex 2 (reaction pathway 3)

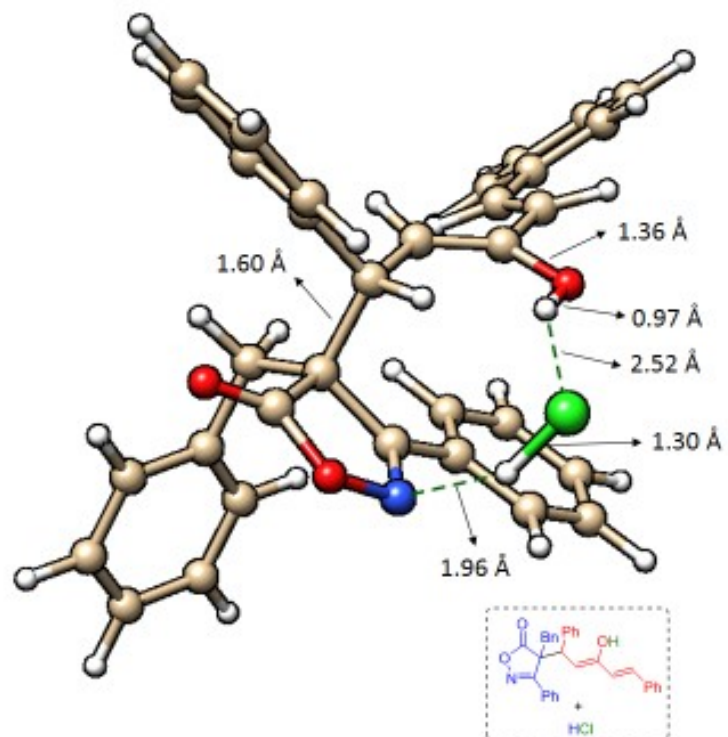

## 11. Coordinates of Optimized Stationary Points

### - Molecular complex 1 (pathway 1)

Symbolic Z-matrix:

Charge = 0 Multiplicity = 1

|   |          |          |          |
|---|----------|----------|----------|
| C | -1.12202 | 1.71748  | -0.88895 |
| C | -0.2291  | 2.70473  | -0.32584 |
| H | -0.62073 | 3.32452  | 0.47403  |
| C | -2.43235 | 1.58281  | -0.29914 |
| H | -2.61733 | 2.21599  | 0.56252  |
| C | 1.06565  | 2.77058  | -0.7099  |
| H | 1.39825  | 2.07468  | -1.47647 |
| C | -3.357   | 0.70159  | -0.7425  |
| H | -3.12147 | 0.08886  | -1.61155 |
| O | -0.6766  | 1.01345  | -1.85807 |
| C | -4.66645 | 0.44689  | -0.15737 |
| C | -5.46719 | -0.52978 | -0.76751 |
| C | -5.14191 | 1.10033  | 0.99066  |
| C | -6.71804 | -0.84349 | -0.24756 |
| H | -5.08876 | -1.04261 | -1.64866 |
| C | -6.39012 | 0.78715  | 1.50676  |
| H | -4.5303  | 1.84998  | 1.48375  |
| C | -7.18074 | -0.18438 | 0.88811  |
| H | -7.32952 | -1.60081 | -0.72699 |
| H | -6.75266 | 1.29712  | 2.39356  |
| H | -8.15699 | -0.42653 | 1.29648  |
| C | 2.0821   | 3.65757  | -0.16132 |
| C | 3.42944  | 3.31738  | -0.35046 |
| C | 1.76111  | 4.82216  | 0.55311  |
| C | 4.43461  | 4.11602  | 0.18179  |
| H | 3.67409  | 2.40679  | -0.89101 |
| C | 2.76748  | 5.62351  | 1.07169  |
| H | 0.72177  | 5.11209  | 0.67697  |
| C | 4.10545  | 5.26912  | 0.89026  |
| H | 5.47449  | 3.83984  | 0.04179  |
| H | 2.51352  | 6.52909  | 1.6132   |
| H | 4.89086  | 5.89778  | 1.29831  |
| C | 1.0957   | -0.7726  | -0.15389 |
| C | 1.38086  | -1.65842 | -1.32838 |
| C | 2.6871   | -1.05495 | -1.79513 |
| N | 1.99664  | 0.12416  | 0.03179  |
| C | -0.09288 | -0.81577 | 0.71236  |
| C | -1.16939 | -1.64773 | 0.38785  |
| C | -0.17728 | 0.02057  | 1.83431  |
| C | -2.31276 | -1.64926 | 1.18308  |
| H | -1.14229 | -2.25307 | -0.51257 |

|    |          |          |          |
|----|----------|----------|----------|
| C  | -1.32418 | 0.01717  | 2.62013  |
| H  | 0.66339  | 0.66397  | 2.07584  |
| C  | -2.39339 | -0.81918 | 2.29815  |
| H  | -1.38101 | 0.66357  | 3.49093  |
| H  | -3.29146 | -0.81743 | 2.90895  |
| C  | 1.56687  | -3.1629  | -1.02712 |
| H  | 0.58777  | -3.61215 | -0.84093 |
| H  | 1.96569  | -3.61308 | -1.94203 |
| C  | 2.49416  | -3.40931 | 0.139    |
| C  | 3.87873  | -3.44888 | -0.0488  |
| C  | 1.98353  | -3.55486 | 1.43154  |
| C  | 4.73388  | -3.63007 | 1.03479  |
| H  | 4.28469  | -3.33715 | -1.05111 |
| C  | 2.83742  | -3.7376  | 2.51525  |
| H  | 0.90716  | -3.52601 | 1.58667  |
| C  | 4.21557  | -3.77503 | 2.31891  |
| H  | 5.80706  | -3.66195 | 0.87365  |
| H  | 2.42549  | -3.8534  | 3.51315  |
| H  | 4.88276  | -3.91981 | 3.16305  |
| O  | 2.98584  | -0.00505 | -0.95992 |
| O  | 3.41366  | -1.38106 | -2.68605 |
| Cl | -1.77911 | -1.31055 | -2.98927 |
| H  | -1.21285 | 0.14947  | -2.25101 |
| H  | 0.61515  | -1.53858 | -2.11026 |
| H  | -3.15084 | -2.28492 | 0.91379  |

### - Transition state 1 (pathway 1)

Symbolic Z-matrix:

Charge = 0 Multiplicity = 1

|   |          |          |          |
|---|----------|----------|----------|
| C | -1.36905 | 1.25477  | -0.94573 |
| C | -0.39472 | 2.1114   | -0.47941 |
| H | -0.62892 | 2.78117  | 0.33703  |
| C | -2.71202 | 1.26465  | -0.38091 |
| H | -2.85048 | 1.92369  | 0.47238  |
| C | 0.93006  | 2.03301  | -1.01269 |
| H | 0.96707  | 1.82265  | -2.08207 |
| C | -3.71092 | 0.48882  | -0.83516 |
| H | -3.52136 | -0.18712 | -1.66569 |
| O | -1.01043 | 0.38939  | -1.87548 |
| C | -5.05771 | 0.39979  | -0.2681  |
| C | -5.82859 | -0.72686 | -0.58582 |
| C | -5.59921 | 1.37595  | 0.57993  |
| C | -7.10343 | -0.88349 | -0.05308 |
| H | -5.40456 | -1.4841  | -1.24096 |



C -6.8753 1.22164 1.10455  
 H -5.027 2.27042 0.80904  
 C -7.62944 0.09001 0.79238  
 H -7.68765 -1.76395 -0.30119  
 H -7.28908 1.9882 1.75247  
 H -8.62784 -0.02666 1.20252  
 C 1.98524 2.97637 -0.55768  
 C 3.04504 3.26841 -1.42051  
 C 1.9565 3.56037 0.71257  
 C 4.05331 4.14185 -1.02754  
 H 3.07645 2.80109 -2.401  
 C 2.966 4.43133 1.10642  
 H 1.14559 3.33198 1.3984  
 C 4.01393 4.7255 0.23619  
 H 4.86919 4.36579 -1.70704  
 H 2.93512 4.88279 2.09294  
 H 4.79957 5.40817 0.54438  
 C 0.97871 -0.64645 -0.25543  
 C 1.17968 -1.84736 -1.11547  
 C 2.15125 -1.30337 -2.13382  
 N 1.62095 0.38136 -0.71788  
 C 0.18862 -0.55163 0.96156  
 C -0.96257 -1.33555 1.10811  
 C 0.58192 0.33944 1.97028  
 C -1.73378 -1.19555 2.25778  
 H -1.28549 -1.99335 0.30157  
 C -0.18768 0.45817 3.11859  
 H 1.50308 0.90399 1.84929  
 C -1.34831 -0.30586 3.25839  
 H 0.11669 1.13777 3.90823  
 H -1.9515 -0.20916 4.15599  
 C 1.70281 -3.11217 -0.40866  
 H 0.88537 -3.53002 0.18651  
 H 1.94063 -3.83515 -1.1953  
 C 2.90809 -2.82962 0.45673  
 C 4.18431 -2.74062 -0.10765  
 C 2.75774 -2.59924 1.82705  
 C 5.28537 -2.42233 0.68244  
 H 4.31301 -2.92676 -1.17101  
 C 3.8587 -2.28136 2.61779  
 H 1.77005 -2.67433 2.27651  
 C 5.12505 -2.19007 2.04626  
 H 6.27096 -2.36094 0.23153  
 H 3.72661 -2.1104 3.68187  
 H 5.98486 -1.94531 2.66212  
 O 2.34233 0.04513 -1.86238  
 O 2.73169 -1.83998 -3.0234  
 Cl -2.11324 -2.27579 -2.07388

H -1.57212 -0.46942 -1.9662  
 H 0.21811 -2.08189 -1.6201  
 H -2.6441 -1.77641 2.36289

**- Molecular complex 2 (pathway 1)**

Symbolic Z-matrix:

Charge = 0 Multiplicity = 1

C -1.46142 1.17225 -1.11965  
 C -0.47243 2.0142 -0.73433  
 H -0.683 2.8141 -0.03907  
 C -2.80555 1.24617 -0.55175  
 H -2.94795 2.01342 0.20569  
 C 0.91166 1.82383 -1.2534  
 H 0.9069 1.8416 -2.34922  
 C -3.79186 0.39388 -0.86927  
 H -3.60129 -0.3968 -1.5917  
 O -1.14643 0.21327 -2.00539  
 C -5.13062 0.36838 -0.2703  
 C -5.87198 -0.81726 -0.35948  
 C -5.69328 1.46879 0.39029  
 C -7.13493 -0.90777 0.21558  
 H -5.43499 -1.67133 -0.87137  
 C -6.95698 1.37894 0.95958  
 H -5.14677 2.40658 0.4365  
 C -7.6806 0.18944 0.87718  
 H -7.69478 -1.83508 0.14395  
 H -7.38518 2.24147 1.46124  
 H -8.66951 0.123 1.32021  
 C 1.99171 2.76125 -0.75247  
 C 3.14142 2.92345 -1.52949  
 C 1.88357 3.45197 0.45536  
 C 4.16824 3.76038 -1.10635  
 H 3.22897 2.38754 -2.47125  
 C 2.90972 4.2938 0.87724  
 H 1.00113 3.33292 1.0766  
 C 4.0528 4.44934 0.09868  
 H 5.05496 3.87902 -1.72063  
 H 2.81239 4.83094 1.81543  
 H 4.85006 5.10807 0.42808  
 C 0.89962 -0.58481 -0.30623  
 C 1.1112 -1.89222 -0.9747  
 C 1.95452 -1.49897 -2.15315  
 N 1.35659 0.37034 -1.05549  
 C 0.25917 -0.36542 0.98313  
 C -0.89235 -1.09099 1.30987  
 C 0.83581 0.52876 1.89442  
 C -1.48961 -0.8747 2.54819

|    |          |          |          |
|----|----------|----------|----------|
| H  | -1.33914 | -1.77056 | 0.58273  |
| C  | 0.24188  | 0.71338  | 3.13466  |
| H  | 1.76017  | 1.03788  | 1.63712  |
| C  | -0.92597 | 0.01893  | 3.45629  |
| H  | 0.68985  | 1.39269  | 3.85278  |
| H  | -1.39335 | 0.17123  | 4.42429  |
| C  | 1.68357  | -3.04428 | -0.13598 |
| H  | 0.90184  | -3.38094 | 0.55115  |
| H  | 1.88281  | -3.8658  | -0.83132 |
| C  | 2.93158  | -2.64419 | 0.61514  |
| C  | 4.16709  | -2.58717 | -0.03796 |
| C  | 2.86046  | -2.27452 | 1.96092  |
| C  | 5.30527  | -2.16082 | 0.64047  |
| H  | 4.23559  | -2.88686 | -1.0808  |
| C  | 3.999    | -1.84784 | 2.63993  |
| H  | 1.90542  | -2.32406 | 2.47938  |
| C  | 5.22344  | -1.78742 | 1.97996  |
| H  | 6.25885  | -2.12644 | 0.12281  |
| H  | 3.92848  | -1.56786 | 3.68664  |
| H  | 6.11231  | -1.45819 | 2.50903  |
| O  | 2.00482  | -0.10207 | -2.18725 |
| O  | 2.53131  | -2.1444  | -2.96624 |
| Cl | -2.07142 | -2.57954 | -1.64307 |
| H  | -1.67317 | -0.6402  | -1.92004 |
| H  | 0.09557  | -2.19579 | -1.35959 |
| H  | -2.40071 | -1.40764 | 2.79873  |

**- Molecular complex 3 (pathway 1)**

Symbolic Z-matrix:

Charge = 0 Multiplicity = 1

|   |          |          |          |
|---|----------|----------|----------|
| C | -1.43593 | 0.93655  | -1.39318 |
| C | -0.38393 | 1.73701  | -1.09888 |
| H | -0.49837 | 2.60332  | -0.46023 |
| C | -2.762   | 1.16188  | -0.82294 |
| H | -2.84811 | 2.02362  | -0.16469 |
| C | 0.98912  | 1.31199  | -1.51259 |
| H | 1.03236  | 1.17058  | -2.59968 |
| C | -3.79042 | 0.31929  | -1.00131 |
| H | -3.64829 | -0.5691  | -1.61263 |
| O | -1.20031 | -0.12922 | -2.17474 |
| C | -5.10699 | 0.43308  | -0.36447 |
| C | -5.88147 | -0.72676 | -0.2296  |
| C | -5.61424 | 1.6449   | 0.1232   |
| C | -7.12235 | -0.68005 | 0.39663  |
| H | -5.48598 | -1.66714 | -0.606   |
| C | -6.8564  | 1.6913   | 0.74327  |
| H | -5.04135 | 2.55875  | -0.00745 |

|    |          |          |          |
|----|----------|----------|----------|
| C  | -7.61304 | 0.52841  | 0.88526  |
| H  | -7.7084  | -1.588   | 0.50038  |
| H  | -7.24192 | 2.63833  | 1.10883  |
| H  | -8.58508 | 0.56757  | 1.3673   |
| C  | 2.12393  | 2.21768  | -1.07089 |
| C  | 3.2979   | 1.72037  | -0.50169 |
| C  | 1.99023  | 3.59249  | -1.27722 |
| C  | 4.31835  | 2.59356  | -0.13229 |
| H  | 3.4309   | 0.65268  | -0.3383  |
| C  | 3.01525  | 4.45978  | -0.91445 |
| H  | 1.08079  | 3.98051  | -1.7278  |
| C  | 4.18175  | 3.96279  | -0.3372  |
| H  | 5.22169  | 2.19081  | 0.31521  |
| H  | 2.90061  | 5.52612  | -1.08148 |
| H  | 4.9796   | 4.64041  | -0.05049 |
| C  | 0.76381  | -0.83003 | -0.10477 |
| C  | 1.06838  | -2.26291 | -0.38373 |
| C  | 1.82663  | -2.17247 | -1.68231 |
| N  | 1.24681  | -0.09823 | -1.05627 |
| C  | 0.05958  | -0.33026 | 1.07028  |
| C  | -1.04098 | -1.05606 | 1.54224  |
| C  | 0.49296  | 0.83021  | 1.72938  |
| C  | -1.72925 | -0.58832 | 2.65841  |
| H  | -1.39921 | -1.92568 | 0.99298  |
| C  | -0.18627 | 1.26605  | 2.85634  |
| H  | 1.36925  | 1.36374  | 1.37019  |
| C  | -1.30293 | 0.56196  | 3.31475  |
| H  | 0.14972  | 2.15669  | 3.37701  |
| H  | -1.83999 | 0.91599  | 4.18933  |
| C  | 1.92108  | -2.94254 | 0.7117   |
| H  | 1.29429  | -3.07797 | 1.5976   |
| H  | 2.19137  | -3.93355 | 0.33459  |
| C  | 3.15027  | -2.12337 | 1.04172  |
| C  | 4.2814   | -2.1683  | 0.21837  |
| C  | 3.14931  | -1.25474 | 2.13787  |
| C  | 5.38305  | -1.35776 | 0.48378  |
| H  | 4.30261  | -2.84825 | -0.62944 |
| C  | 4.24881  | -0.4416  | 2.40216  |
| H  | 2.28111  | -1.21959 | 2.79129  |
| C  | 5.36907  | -0.49238 | 1.57573  |
| H  | 6.2555   | -1.41009 | -0.1599  |
| H  | 4.23226  | 0.22469  | 3.2592   |
| H  | 6.23256  | 0.13082  | 1.7886   |
| O  | 1.91958  | -0.8227  | -2.02493 |
| O  | 2.3463   | -3.00452 | -2.34994 |
| Cl | -2.14933 | -2.77286 | -1.21668 |
| H  | -1.69979 | -0.96311 | -1.90415 |
| H  | 0.10579  | -2.78986 | -0.56287 |

H -2.60565 -1.12489 3.0055

**- Transition state 2 (pathway 1)**

Symbolic Z-matrix:

Charge = 0 Multiplicity = 1

C -1.52234 1.3477 -1.09439  
C -0.53501 2.12343 -0.60774  
H -0.6919 2.72046 0.28195  
C -2.80757 1.19961 -0.41994  
H -2.89957 1.74309 0.51715  
C 0.84475 2.02134 -1.19503  
H 0.79557 2.18032 -2.27912  
C -3.80441 0.41772 -0.86155  
H -3.70348 -0.08195 -1.82435  
O -1.25717 0.62953 -2.2116  
C -5.0688 0.16785 -0.16019  
C -6.1435 -0.38126 -0.87055  
C -5.24086 0.44629 1.20353  
C -7.36371 -0.61959 -0.24809  
H -6.01587 -0.61701 -1.92375  
C -6.45896 0.20753 1.82595  
H -4.40743 0.83054 1.78478  
C -7.52675 -0.32214 1.10202  
H -8.18624 -1.04124 -0.81716  
H -6.57525 0.42602 2.88308  
H -8.47673 -0.51107 1.59192  
C 1.86661 2.9743 -0.59932  
C 3.18738 2.58277 -0.37446  
C 1.48889 4.28965 -0.32244  
C 4.11037 3.48935 0.14082  
H 3.49905 1.5676 -0.60401  
C 2.41455 5.1961 0.18559  
H 0.46756 4.60782 -0.51246  
C 3.72693 4.79699 0.42428  
H 5.1328 3.17009 0.31635  
H 2.10745 6.21561 0.39679  
H 4.44766 5.50242 0.82533  
C 0.94507 -0.41426 -0.3759  
C 1.18556 -1.62949 -1.06946  
C 1.94105 -1.22399 -2.25895  
N 1.3171 0.60971 -1.12349  
C 0.34668 -0.25732 0.95353  
C -0.7772 -1.02028 1.28714  
C 0.90961 0.62527 1.88129  
C -1.34991 -0.87652 2.54715  
H -1.2194 -1.68893 0.55221  
C 0.33965 0.74713 3.14247

H 1.79221 1.20031 1.61492

C -0.79187 0.00185 3.47396  
H 0.77918 1.42392 3.8679  
H -1.23633 0.10373 4.45916  
C 1.52815 -2.94747 -0.39427  
H 0.6867 -3.27221 0.2255  
H 1.64397 -3.6886 -1.19194  
C 2.79065 -2.83562 0.42981  
C 4.04225 -2.87017 -0.19269  
C 2.72463 -2.63093 1.80966  
C 5.20509 -2.70558 0.55372  
H 4.09679 -3.025 -1.26763  
C 3.88875 -2.46644 2.55696  
H 1.75416 -2.60097 2.30077  
C 5.13138 -2.50313 1.93058  
H 6.17137 -2.74056 0.0597  
H 3.82327 -2.31345 3.63002  
H 6.03937 -2.37923 2.51275  
O 1.90986 0.18001 -2.29667  
O 2.51285 -1.84125 -3.10835  
Cl -1.51109 -2.45348 -2.00243  
H -1.70968 -0.23947 -2.20801  
H -0.0993 -1.92939 -1.57518  
H -2.23422 -1.45219 2.80101

**- Molecular complex 4 (pathway 1)**

Symbolic Z-matrix:

Charge = 0 Multiplicity = 1

C -1.65065 1.19363 -0.96749  
C -0.72383 1.9953 -0.41825  
H -0.9197 2.4679 0.537  
C -2.91485 0.89063 -0.30416  
H -2.99514 1.26761 0.71217  
C 0.63131 2.14778 -1.05291  
H 0.49845 2.30411 -2.13043  
C -3.92246 0.19454 -0.85214  
H -3.8572 -0.11977 -1.89433  
O -1.36007 0.61658 -2.16514  
C -5.17279 -0.17343 -0.17706  
C -6.27849 -0.55503 -0.94693  
C -5.30061 -0.16581 1.21928  
C -7.48565 -0.89252 -0.34513  
H -6.18779 -0.57739 -2.02992  
C -6.50593 -0.50278 1.8208  
H -4.44251 0.08223 1.83746  
C -7.60454 -0.86374 1.04152  
H -8.33286 -1.18041 -0.95957

|    |          |          |          |
|----|----------|----------|----------|
| H  | -6.58752 | -0.49487 | 2.90335  |
| H  | -8.54415 | -1.13069 | 1.51472  |
| C  | 1.44764  | 3.30126  | -0.48923 |
| C  | 2.83134  | 3.20308  | -0.33571 |
| C  | 0.81301  | 4.50427  | -0.17305 |
| C  | 3.56441  | 4.28466  | 0.14599  |
| H  | 3.33435  | 2.27705  | -0.59774 |
| C  | 1.54715  | 5.58642  | 0.3037   |
| H  | -0.26145 | 4.59701  | -0.30718 |
| C  | 2.92524  | 5.47809  | 0.46997  |
| H  | 4.63967  | 4.19285  | 0.26418  |
| H  | 1.03974  | 6.5149   | 0.54683  |
| H  | 3.49795  | 6.3202   | 0.84559  |
| C  | 1.13144  | -0.2566  | -0.29794 |
| C  | 1.53136  | -1.35777 | -1.01221 |
| C  | 2.09262  | -0.85533 | -2.25302 |
| N  | 1.39564  | 0.87809  | -0.99778 |
| C  | 0.59323  | -0.19221 | 1.07079  |
| C  | -0.45436 | -1.03693 | 1.44979  |
| C  | 1.13186  | 0.7115   | 1.99099  |
| C  | -0.96212 | -0.97251 | 2.74306  |
| H  | -0.89299 | -1.71629 | 0.72335  |
| C  | 0.62157  | 0.76773  | 3.28384  |
| H  | 1.94601  | 1.36429  | 1.68836  |
| C  | -0.42464 | -0.07167 | 3.66124  |
| H  | 1.04362  | 1.46772  | 3.99776  |
| H  | -0.82093 | -0.0246  | 4.67076  |
| C  | 1.77098  | -2.76851 | -0.5463  |
| H  | 0.95029  | -3.11464 | 0.08996  |
| H  | 1.78989  | -3.41214 | -1.43288 |
| C  | 3.08411  | -2.8741  | 0.20173  |
| C  | 4.28937  | -2.91972 | -0.50388 |
| C  | 3.11055  | -2.86505 | 1.59674  |
| C  | 5.50086  | -2.96707 | 0.17864  |
| H  | 4.26736  | -2.90799 | -1.59109 |
| C  | 4.32357  | -2.91294 | 2.27995  |
| H  | 2.17458  | -2.81906 | 2.14966  |
| C  | 5.52106  | -2.9659  | 1.57226  |
| H  | 6.43181  | -3.00705 | -0.37882 |
| H  | 4.33173  | -2.91105 | 3.36585  |
| H  | 6.46692  | -3.0068  | 2.10369  |
| O  | 1.93509  | 0.52919  | -2.22976 |
| O  | 2.63324  | -1.40349 | -3.17876 |
| Cl | -1.43266 | -2.55055 | -2.01021 |
| H  | -1.92016 | -0.16253 | -2.31058 |
| H  | -0.31945 | -1.90801 | -1.73114 |
| H  | -1.78137 | -1.62386 | 3.03113  |

## - Molecular complex 5 (pathway 1)

Symbolic Z-matrix:

Charge = 0 Multiplicity = 1

|   |          |          |          |
|---|----------|----------|----------|
| C | 2.07246  | -0.26935 | -0.82806 |
| C | 1.04484  | -1.00238 | -0.3305  |
| H | 1.0499   | -1.19539 | 0.73693  |
| C | 3.22879  | 0.0845   | -0.00781 |
| H | 3.23144  | -0.31918 | 1.00116  |
| C | -0.13769 | -1.44227 | -1.14097 |
| H | 0.17052  | -1.58257 | -2.18489 |
| C | 4.226    | 0.86089  | -0.45614 |
| H | 4.14163  | 1.25971  | -1.46471 |
| O | 2.15892  | 0.148    | -2.10894 |
| C | 5.4227   | 1.2498   | 0.2982   |
| C | 6.21534  | 2.29756  | -0.18729 |
| C | 5.80992  | 0.615    | 1.4872   |
| C | 7.34765  | 2.71658  | 0.50267  |
| H | 5.9301   | 2.78976  | -1.11334 |
| C | 6.94141  | 1.03075  | 2.17569  |
| H | 5.23275  | -0.22375 | 1.86473  |
| C | 7.71295  | 2.08563  | 1.68839  |
| H | 7.94604  | 3.53393  | 0.11258  |
| H | 7.22983  | 0.52532  | 3.09218  |
| H | 8.59877  | 2.40673  | 2.22733  |
| C | -0.81789 | -2.72952 | -0.7024  |
| C | -1.8209  | -3.24307 | -1.5299  |
| C | -0.50847 | -3.39921 | 0.47898  |
| C | -2.52129 | -4.38725 | -1.17038 |
| H | -2.06376 | -2.71995 | -2.45152 |
| C | -1.21173 | -4.54584 | 0.84308  |
| H | 0.27581  | -3.03587 | 1.13399  |
| C | -2.22223 | -5.03904 | 0.02527  |
| H | -3.29824 | -4.77277 | -1.82332 |
| H | -0.96543 | -5.05143 | 1.7715   |
| H | -2.76825 | -5.93279 | 0.31103  |
| C | -1.58859 | 0.27565  | -0.06703 |
| C | -1.38199 | 1.60684  | -0.12751 |
| C | -0.7498  | 1.87756  | -1.40988 |
| N | -1.18688 | -0.36369 | -1.25117 |
| C | -2.16133 | -0.53188 | 1.02426  |
| C | -1.58787 | -0.4722  | 2.29683  |
| C | -3.24612 | -1.38135 | 0.78655  |
| C | -2.08581 | -1.2719  | 3.32205  |
| H | -0.7373  | 0.18269  | 2.46771  |
| C | -3.73723 | -2.17951 | 1.8117   |
| H | -3.68134 | -1.4232  | -0.20668 |
| C | -3.15556 | -2.12885 | 3.07831  |

|    |          |          |          |
|----|----------|----------|----------|
| H  | -4.56938 | -2.84926 | 1.61988  |
| H  | -3.53771 | -2.75868 | 3.87566  |
| C  | -1.81093 | 2.70499  | 0.79768  |
| H  | -1.88825 | 2.32282  | 1.81961  |
| H  | -1.03984 | 3.48268  | 0.78811  |
| C  | -3.1418  | 3.28842  | 0.36381  |
| C  | -3.1983  | 4.23258  | -0.6639  |
| C  | -4.32824 | 2.84706  | 0.95076  |
| C  | -4.42532 | 4.73396  | -1.08864 |
| H  | -2.27552 | 4.56051  | -1.13558 |
| C  | -5.55554 | 3.35003  | 0.52724  |
| H  | -4.2875  | 2.10378  | 1.74416  |
| C  | -5.60614 | 4.29621  | -0.49302 |
| H  | -4.45891 | 5.46922  | -1.88687 |
| H  | -6.47202 | 3.00381  | 0.99556  |
| H  | -6.56212 | 4.6908   | -0.82327 |
| O  | -0.62696 | 0.65143  | -2.05796 |
| O  | -0.37685 | 2.89138  | -1.93481 |
| Cl | 2.58136  | -3.79561 | -1.71692 |
| H  | 1.26602  | 0.25305  | -2.48165 |
| H  | 2.22194  | -2.72715 | -1.06975 |
| H  | -1.63305 | -1.23055 | 4.30765  |

**- Transition state 3 (pathway 1)**

Symbolic Z-matrix:

Charge = 0 Multiplicity = 1

|   |          |          |          |
|---|----------|----------|----------|
| C | -0.36616 | -2.48735 | -0.33703 |
| C | -1.51715 | -1.78844 | 0.03655  |
| H | -1.46612 | -1.38117 | 1.04412  |
| C | 0.82126  | -2.51804 | 0.49257  |
| H | 0.71228  | -2.13457 | 1.50335  |
| C | -2.16434 | -0.84508 | -0.96719 |
| H | -2.29249 | -1.34321 | -1.93368 |
| C | 2.03352  | -2.72854 | -0.05396 |
| H | 2.0842   | -2.98284 | -1.11027 |
| O | -0.27571 | -3.13813 | -1.48309 |
| C | 3.30589  | -2.48973 | 0.62982  |
| C | 4.40282  | -2.06385 | -0.13164 |
| C | 3.44707  | -2.62233 | 2.01764  |
| C | 5.60971  | -1.75608 | 0.48679  |
| H | 4.28402  | -1.94417 | -1.20511 |
| C | 4.65771  | -2.32509 | 2.63094  |
| H | 2.61098  | -2.98403 | 2.60997  |
| C | 5.73947  | -1.88638 | 1.86805  |
| H | 6.45031  | -1.41538 | -0.10957 |
| H | 4.76165  | -2.44091 | 3.70517  |
| H | 6.68359  | -1.65248 | 2.34984  |

|    |          |          |          |
|----|----------|----------|----------|
| C  | -3.50859 | -0.27827 | -0.5544  |
| C  | -4.1741  | 0.55037  | -1.46196 |
| C  | -4.08688 | -0.53078 | 0.68668  |
| C  | -5.38337 | 1.14305  | -1.12226 |
| H  | -3.72087 | 0.74518  | -2.43078 |
| C  | -5.29886 | 0.06499  | 1.02992  |
| H  | -3.60126 | -1.19454 | 1.39461  |
| C  | -5.94509 | 0.90795  | 0.13223  |
| H  | -5.88986 | 1.78572  | -1.83579 |
| H  | -5.73684 | -0.13473 | 2.00275  |
| H  | -6.88936 | 1.37079  | 0.40207  |
| C  | -0.57631 | 0.91071  | -0.20427 |
| C  | 0.76371  | 0.78312  | -0.29701 |
| C  | 1.02673  | 0.00136  | -1.49869 |
| N  | -1.22334 | 0.29003  | -1.29231 |
| C  | -1.39109 | 1.55992  | 0.83683  |
| C  | -1.18331 | 1.23963  | 2.18144  |
| C  | -2.39589 | 2.46775  | 0.48709  |
| C  | -1.98582 | 1.80798  | 3.16651  |
| H  | -0.40707 | 0.52579  | 2.44664  |
| C  | -3.19728 | 3.02947  | 1.47254  |
| H  | -2.55397 | 2.70769  | -0.55923 |
| C  | -2.99604 | 2.6977   | 2.81197  |
| H  | -3.98644 | 3.72039  | 1.194    |
| H  | -3.62848 | 3.13296  | 3.57932  |
| C  | 1.87873  | 1.3178   | 0.54655  |
| H  | 1.46828  | 1.75173  | 1.46378  |
| H  | 2.5272   | 0.47985  | 0.83393  |
| C  | 2.69134  | 2.3576   | -0.19997 |
| C  | 3.90529  | 2.02397  | -0.79888 |
| C  | 2.20586  | 3.661    | -0.32266 |
| C  | 4.62957  | 2.98373  | -1.50187 |
| H  | 4.27316  | 1.00441  | -0.71864 |
| C  | 2.92823  | 4.62129  | -1.02312 |
| H  | 1.25305  | 3.91963  | 0.13539  |
| C  | 4.14431  | 4.28354  | -1.61392 |
| H  | 5.57368  | 2.71407  | -1.96534 |
| H  | 2.54356  | 5.63313  | -1.10787 |
| H  | 4.7099   | 5.03137  | -2.1612  |
| O  | -0.19789 | -0.27101 | -2.07548 |
| O  | 2.05408  | -0.39672 | -1.98514 |
| Cl | -3.32429 | -3.9121  | -0.87244 |
| H  | -1.15466 | -3.21109 | -1.90694 |
| H  | -2.47444 | -2.888   | -0.15327 |
| H  | -1.8271  | 1.54883  | 4.20839  |

**- Molecular complex 6 (pathway 1)**

Symbolic Z-matrix:

Charge = 0 Multiplicity = 1

|   |          |          |          |
|---|----------|----------|----------|
| C | -0.66413 | -2.73741 | 0.23571  |
| C | -1.84013 | -1.83402 | 0.56997  |
| H | -1.62592 | -1.23514 | 1.4607   |
| C | 0.61278  | -2.46432 | 0.9157   |
| H | 0.58907  | -1.81972 | 1.79085  |
| C | -2.22098 | -0.91427 | -0.60622 |
| H | -2.37962 | -1.54175 | -1.48891 |
| C | 1.77768  | -2.84374 | 0.36482  |
| H | 1.73863  | -3.38802 | -0.57768 |
| O | -0.77859 | -3.62623 | -0.59955 |
| C | 3.0986   | -2.46514 | 0.87558  |
| C | 4.15717  | -2.3121  | -0.02921 |
| C | 3.3171   | -2.19338 | 2.23312  |
| C | 5.39893  | -1.86707 | 0.4114   |
| H | 3.98122  | -2.50289 | -1.08334 |
| C | 4.56094  | -1.75677 | 2.67223  |
| H | 2.51202  | -2.34564 | 2.94667  |
| C | 5.60234  | -1.58538 | 1.76084  |
| H | 6.20873  | -1.73798 | -0.29989 |
| H | 4.72202  | -1.55506 | 3.72657  |
| H | 6.57263  | -1.24043 | 2.10419  |
| C | -3.48301 | -0.10246 | -0.36979 |
| C | -4.02379 | 0.59095  | -1.45628 |
| C | -4.09588 | 0.00642  | 0.87636  |
| C | -5.14308 | 1.3976   | -1.29477 |
| H | -3.54374 | 0.50637  | -2.42798 |
| C | -5.21924 | 0.81459  | 1.0406   |
| H | -3.69386 | -0.51697 | 1.738    |
| C | -5.74136 | 1.51606  | -0.0405  |
| H | -5.55218 | 1.93113  | -2.14714 |
| H | -5.68028 | 0.89864  | 2.01977  |
| H | -6.61568 | 2.14646  | 0.08907  |
| C | -0.41288 | 0.74668  | -0.07989 |
| C | 0.91879  | 0.57855  | -0.23812 |
| C | 1.09017  | -0.38072 | -1.31925 |
| N | -1.12725 | 0.0000   | -1.02401 |
| C | -1.14217 | 1.61547  | 0.86338  |
| C | -0.94818 | 1.47071  | 2.23916  |
| C | -2.03709 | 2.57811  | 0.38486  |
| C | -1.66336 | 2.26516  | 3.1318   |
| H | -0.24691 | 0.72387  | 2.60419  |
| C | -2.7488  | 3.36789  | 1.27837  |
| H | -2.18393 | 2.68194  | -0.68545 |
| C | -2.56728 | 3.20871  | 2.65205  |
| H | -3.45386 | 4.10225  | 0.90233  |
| H | -3.12961 | 3.82302  | 3.34828  |

|    |          |          |          |
|----|----------|----------|----------|
| C  | 2.08472  | 1.2305   | 0.43848  |
| H  | 1.73459  | 1.77225  | 1.32325  |
| H  | 2.77444  | 0.44729  | 0.77816  |
| C  | 2.80987  | 2.17804  | -0.4968  |
| C  | 3.93479  | 1.75798  | -1.20606 |
| C  | 2.32902  | 3.47506  | -0.68615 |
| C  | 4.57613  | 2.62752  | -2.08481 |
| H  | 4.29415  | 0.74089  | -1.07343 |
| C  | 2.96972  | 4.34555  | -1.56192 |
| H  | 1.44444  | 3.79994  | -0.14153 |
| C  | 4.09728  | 3.92257  | -2.26286 |
| H  | 5.45073  | 2.29123  | -2.63333 |
| H  | 2.5905   | 5.354    | -1.69723 |
| H  | 4.59906  | 4.60019  | -2.94679 |
| O  | -0.17356 | -0.74809 | -1.73651 |
| O  | 2.07644  | -0.84938 | -1.82913 |
| Cl | -3.64276 | -4.07525 | -1.53949 |
| H  | -2.36684 | -3.96479 | -1.21851 |
| H  | -2.70837 | -2.46994 | 0.77923  |
| H  | -1.51617 | 2.14377  | 4.20026  |

#### - Molecular complex 1 (pathway 2)

Symbolic Z-matrix:

Charge = 0 Multiplicity = 1

|   |          |          |          |
|---|----------|----------|----------|
| C | -1.30448 | -1.99123 | -0.68247 |
| C | 0.00533  | -1.72277 | -1.19838 |
| H | 0.11913  | -0.79106 | -1.74457 |
| C | -2.39484 | -1.13221 | -1.09206 |
| H | -2.16241 | -0.35687 | -1.81416 |
| C | 1.06599  | -2.54527 | -0.99023 |
| H | 0.91469  | -3.46224 | -0.4267  |
| C | -3.6247  | -1.2734  | -0.55529 |
| H | -3.76306 | -2.08853 | 0.15334  |
| O | -1.57506 | -2.9422  | 0.13479  |
| C | -4.79164 | -0.43832 | -0.81533 |
| C | -4.71431 | 0.76773  | -1.5299  |
| C | -6.03153 | -0.84197 | -0.30144 |
| C | -5.85041 | 1.53664  | -1.73338 |
| H | -3.75639 | 1.11358  | -1.90626 |
| C | -7.17112 | -0.07355 | -0.50982 |
| H | -6.09468 | -1.76929 | 0.26177  |
| C | -7.08195 | 1.11647  | -1.22694 |
| H | -5.77978 | 2.46979  | -2.28292 |
| H | -8.1256  | -0.40047 | -0.11053 |
| H | -7.96836 | 1.722    | -1.38722 |
| C | 2.43001  | -2.2879  | -1.40392 |
| C | 3.45033  | -3.00774 | -0.76209 |

C 2.76741 -1.32235 -2.36877  
 C 4.78159 -2.7467 -1.05808  
 H 3.18178 -3.73581 -0.00065  
 C 4.09571 -1.08366 -2.67754  
 H 1.98434 -0.7777 -2.88917  
 C 5.10317 -1.78844 -2.01501  
 H 5.56724 -3.28187 -0.53601  
 H 4.35451 -0.33967 -3.42383  
 H 6.14357 -1.57957 -2.24213  
 C 1.06078 0.12536 1.22512  
 C 1.95221 0.68244 0.35967  
 C 3.23971 0.07169 0.65247  
 N 1.71275 -0.75777 2.07232  
 C -0.38129 0.35294 1.42379  
 C -1.14288 -0.52933 2.20299  
 C -1.00704 1.47658 0.86319  
 C -2.50112 -0.29963 2.39669  
 H -0.68643 -1.40423 2.65722  
 C -2.36499 1.69989 1.06116  
 H -0.41841 2.20958 0.32347  
 C -3.11786 0.81206 1.82661  
 H -2.83298 2.58093 0.63211  
 H -4.17881 0.98871 1.9786  
 C 1.83959 1.68311 -0.75073  
 H 2.65533 1.45039 -1.44832  
 H 0.89907 1.55021 -1.30053  
 C 1.97563 3.13215 -0.32006  
 C 1.0689 4.10063 -0.74956  
 C 3.04225 3.51863 0.49712  
 C 1.21219 5.43286 -0.36435  
 H 0.24263 3.81066 -1.39667  
 C 3.18768 4.84673 0.88089  
 H 3.76436 2.77052 0.81492  
 C 2.27135 5.80798 0.45457  
 H 0.49534 6.1742 -0.70452  
 H 4.02087 5.13451 1.51478  
 H 2.38589 6.84376 0.75869  
 O 3.03811 -0.85443 1.64819  
 O 4.33826 0.2802 0.19195  
 Cl 0.39595 -3.75639 1.99177  
 H -0.77879 -3.30242 0.75834  
 H -3.07484 -0.99378 3.00316  
 H 1.34266 -1.71735 2.15864

**- Transition state 1 (pathway 2)**

Symbolic Z-matrix:

Charge = 0 Multiplicity = 1

C -1.5216 -2.01619 0.17912  
 C -0.32717 -1.94262 -0.50466  
 H -0.38163 -1.48136 -1.48332  
 C -2.7234 -1.49395 -0.46768  
 H -2.60448 -1.1378 -1.48682  
 C 0.94637 -2.38253 -0.04382  
 H 0.95439 -3.0932 0.78456  
 C -3.89656 -1.39306 0.17667  
 H -3.95811 -1.79994 1.18422  
 O -1.71698 -2.48527 1.39139  
 C -5.10714 -0.76278 -0.35601  
 C -5.06787 0.14239 -1.42734  
 C -6.34446 -1.04768 0.23606  
 C -6.23594 0.72097 -1.90638  
 H -4.11136 0.41261 -1.86621  
 C -7.51447 -0.4724 -0.24659  
 H -6.38223 -1.73593 1.07628  
 C -7.46363 0.41158 -1.32138  
 H -6.19049 1.42277 -2.73344  
 H -8.46568 -0.71089 0.21863  
 H -8.37496 0.86658 -1.6964  
 C 2.05491 -2.53342 -1.00711  
 C 3.03194 -3.50962 -0.78063  
 C 2.20229 -1.6614 -2.09497  
 C 4.12236 -3.62761 -1.63257  
 H 2.93787 -4.16311 0.082  
 C 3.30039 -1.77244 -2.94029  
 H 1.46857 -0.87893 -2.26915  
 C 4.26008 -2.75584 -2.71067  
 H 4.87414 -4.38699 -1.44565  
 H 3.41078 -1.08834 -3.77563  
 H 5.12021 -2.83717 -3.36751  
 C 1.61296 0.29164 0.56313  
 C 2.82033 0.70057 0.11679  
 C 3.78781 -0.33727 0.49539  
 N 1.73895 -1.01429 1.10241  
 C 0.27197 0.88629 0.51352  
 C -0.61595 0.71017 1.583  
 C -0.13441 1.5997 -0.61903  
 C -1.89556 1.24868 1.51135  
 H -0.31902 0.14204 2.46247  
 C -1.41602 2.13431 -0.68251  
 H 0.55218 1.72371 -1.45138  
 C -2.29853 1.95906 0.38209  
 H -1.72486 2.68807 -1.5637  
 H -3.30451 2.36421 0.32657  
 C 3.28901 1.93827 -0.58541  
 H 4.36046 2.03259 -0.36657

|    |          |          |          |
|----|----------|----------|----------|
| H  | 3.22616  | 1.78078  | -1.67091 |
| C  | 2.56136  | 3.21418  | -0.21601 |
| C  | 2.17217  | 4.11189  | -1.20998 |
| C  | 2.27075  | 3.51735  | 1.11598  |
| C  | 1.49597  | 5.28557  | -0.88575 |
| H  | 2.39483  | 3.8859   | -2.25063 |
| C  | 1.59301  | 4.68665  | 1.44344  |
| H  | 2.56329  | 2.82351  | 1.90027  |
| C  | 1.20058  | 5.57362  | 0.44298  |
| H  | 1.1972   | 5.97137  | -1.67271 |
| H  | 1.36756  | 4.90409  | 2.4828   |
| H  | 0.66772  | 6.48382  | 0.69938  |
| O  | 3.08767  | -1.31258 | 1.19852  |
| O  | 4.96858  | -0.41821 | 0.32181  |
| Cl | 0.43838  | -2.30457 | 3.39907  |
| H  | -0.90612 | -2.54119 | 1.98834  |
| H  | -2.58368 | 1.09899  | 2.33702  |
| H  | 1.2832   | -1.28442 | 2.03827  |

**- Molecular complex 2 (pathway 2)**

Symbolic Z-matrix:

Charge = 0 Multiplicity = 1

|   |          |          |          |
|---|----------|----------|----------|
| C | -2.31395 | -1.20733 | 0.40234  |
| C | -1.11107 | -1.19079 | -0.21637 |
| H | -1.02235 | -0.60893 | -1.12599 |
| C | -3.46203 | -0.51496 | -0.18176 |
| H | -3.29499 | -0.04774 | -1.14905 |
| C | 0.04663  | -2.01648 | 0.21983  |
| H | -0.29695 | -2.76421 | 0.9425   |
| C | -4.6488  | -0.44506 | 0.43907  |
| H | -4.7275  | -0.91393 | 1.41752  |
| O | -2.56991 | -1.876   | 1.54805  |
| C | -5.85581 | 0.22108  | -0.06236 |
| C | -5.98239 | 0.67936  | -1.38203 |
| C | -6.93393 | 0.40847  | 0.81229  |
| C | -7.14149 | 1.3168   | -1.80324 |
| H | -5.17318 | 0.52087  | -2.08859 |
| C | -8.09508 | 1.04823  | 0.39237  |
| H | -6.85065 | 0.0502   | 1.835    |
| C | -8.20208 | 1.5068   | -0.91736 |
| H | -7.22335 | 1.66162  | -2.82954 |
| H | -8.91704 | 1.18643  | 1.08789  |
| H | -9.10817 | 2.00331  | -1.25025 |
| C | 0.83079  | -2.68028 | -0.88862 |
| C | 1.32338  | -3.97276 | -0.6974  |
| C | 1.11148  | -2.01699 | -2.08701 |
| C | 2.07886  | -4.5965  | -1.68621 |

|    |          |          |          |
|----|----------|----------|----------|
| H  | 1.11937  | -4.48768 | 0.2372   |
| C  | 1.8702   | -2.6379  | -3.07397 |
| H  | 0.7384   | -1.01063 | -2.25538 |
| C  | 2.35382  | -3.92942 | -2.87617 |
| H  | 2.45345  | -5.60186 | -1.5238  |
| H  | 2.07873  | -2.11422 | -4.00176 |
| H  | 2.94264  | -4.41403 | -3.6486  |
| C  | 1.81706  | -0.1564  | 0.44749  |
| C  | 3.12234  | -0.45867 | 0.52039  |
| C  | 3.24382  | -1.73553 | 1.24338  |
| N  | 1.04392  | -1.20672 | 1.09907  |
| C  | 1.1134   | 1.00059  | -0.11425 |
| C  | 0.06869  | 1.61433  | 0.58843  |
| C  | 1.53567  | 1.52315  | -1.34165 |
| C  | -0.53566 | 2.7497   | 0.06134  |
| H  | -0.26415 | 1.2108   | 1.54195  |
| C  | 0.9283   | 2.66037  | -1.85902 |
| H  | 2.33949  | 1.0332   | -1.88378 |
| C  | -0.10676 | 3.27437  | -1.15646 |
| H  | 1.26474  | 3.06718  | -2.80699 |
| H  | -0.58138 | 4.16334  | -1.56007 |
| C  | 4.36602  | 0.25833  | 0.08589  |
| H  | 5.16522  | -0.07436 | 0.76082  |
| H  | 4.65298  | -0.1069  | -0.9086  |
| C  | 4.27664  | 1.76938  | 0.07052  |
| C  | 4.75493  | 2.48769  | -1.02466 |
| C  | 3.7064   | 2.46616  | 1.13832  |
| C  | 4.6524   | 3.87626  | -1.06469 |
| H  | 5.20235  | 1.95389  | -1.8602  |
| C  | 3.59488  | 3.85133  | 1.0982   |
| H  | 3.3241   | 1.91847  | 1.99667  |
| C  | 4.06417  | 4.56072  | -0.00595 |
| H  | 5.02625  | 4.42038  | -1.92665 |
| H  | 3.1366   | 4.3775   | 1.92966  |
| H  | 3.97303  | 5.64184  | -0.03784 |
| O  | 1.96675  | -2.13014 | 1.61531  |
| O  | 4.20411  | -2.37557 | 1.54411  |
| Cl | -0.47602 | -0.62202 | 3.43426  |
| H  | -1.90769 | -1.63547 | 2.23917  |
| H  | -1.34357 | 3.22521  | 0.6074   |
| H  | 0.44612  | -0.86362 | 2.04171  |

**- Molecular complex 3 (pathway 2)**

Symbolic Z-matrix:

Charge = 0 Multiplicity = 1

|   |         |          |          |
|---|---------|----------|----------|
| C | 2.07246 | -0.26935 | -0.82806 |
| C | 1.04484 | -1.00238 | -0.3305  |



H 1.0499 -1.19539 0.73693  
 C 3.22879 0.0845 -0.00781  
 H 3.23144 -0.31918 1.00116  
 C -0.13769 -1.44227 -1.14097  
 H 0.17052 -1.58257 -2.18489  
 C 4.226 0.86089 -0.45614  
 H 4.14163 1.25971 -1.46471  
 O 2.15892 0.148 -2.10894  
 C 5.4227 1.2498 0.2982  
 C 6.21534 2.29756 -0.18729  
 C 5.80992 0.615 1.4872  
 C 7.34765 2.71658 0.50267  
 H 5.9301 2.78976 -1.11334  
 C 6.94141 1.03075 2.17569  
 H 5.23275 -0.22375 1.86473  
 C 7.71295 2.08563 1.68839  
 H 7.94604 3.53393 0.11258  
 H 7.22983 0.52532 3.09218  
 H 8.59877 2.40673 2.22733  
 C -0.81789 -2.72952 -0.7024  
 C -1.8209 -3.24307 -1.5299  
 C -0.50847 -3.39921 0.47898  
 C -2.52129 -4.38725 -1.17038  
 H -2.06376 -2.71995 -2.45152  
 C -1.21173 -4.54584 0.84308  
 H 0.27581 -3.03587 1.13399  
 C -2.22223 -5.03904 0.02527  
 H -3.29824 -4.77277 -1.82332  
 H -0.96543 -5.05143 1.7715  
 H -2.76825 -5.93279 0.31103  
 C -1.58859 0.27565 -0.06703  
 C -1.38199 1.60684 -0.12751  
 C -0.7498 1.87756 -1.40988  
 N -1.18688 -0.36369 -1.25117  
 C -2.16133 -0.53188 1.02426  
 C -1.58787 -0.4722 2.29683  
 C -3.24612 -1.38135 0.78655  
 C -2.08581 -1.2719 3.32205  
 H -0.7373 0.18269 2.46771  
 C -3.73723 -2.17951 1.8117  
 H -3.68134 -1.4232 -0.20668  
 C -3.15556 -2.12885 3.07831  
 H -4.56938 -2.84926 1.61988  
 H -3.53771 -2.75868 3.87566  
 C -1.81093 2.70499 0.79768  
 H -1.88825 2.32282 1.81961  
 H -1.03984 3.48268 0.78811  
 C -3.1418 3.28842 0.36381

C -3.1983 4.23258 -0.6639  
 C -4.32824 2.84706 0.95076  
 C -4.42532 4.73396 -1.08864  
 H -2.27552 4.56051 -1.13558  
 C -5.55554 3.35003 0.52724  
 H -4.2875 2.10378 1.74416  
 C -5.60614 4.29621 -0.49302  
 H -4.45891 5.46922 -1.88687  
 H -6.47202 3.00381 0.99556  
 H -6.56212 4.6908 -0.82327  
 O -0.62696 0.65143 -2.05796  
 O -0.37685 2.89138 -1.93481  
 Cl 2.58136 -3.79561 -1.71692  
 H 1.26602 0.25305 -2.48165  
 H 2.22194 -2.72715 -1.06975  
 H -1.63305 -1.23055 4.30765

**- Transition state 2 (pathway 2)**

Symbolic Z-matrix:

Charge = 0 Multiplicity = 1

C -0.36616 -2.48735 -0.33703  
 C -1.51715 -1.78844 0.03655  
 H -1.46612 -1.38117 1.04412  
 C 0.82126 -2.51804 0.49257  
 H 0.71228 -2.13457 1.50335  
 C -2.16434 -0.84508 -0.96719  
 H -2.29249 -1.34321 -1.93368  
 C 2.03352 -2.72854 -0.05396  
 H 2.0842 -2.98284 -1.11027  
 O -0.27571 -3.13813 -1.48309  
 C 3.30589 -2.48973 0.62982  
 C 4.40282 -2.06385 -0.13164  
 C 3.44707 -2.62233 2.01764  
 C 5.60971 -1.75608 0.48679  
 H 4.28402 -1.94417 -1.20511  
 C 4.65771 -2.32509 2.63094  
 H 2.61098 -2.98403 2.60997  
 C 5.73947 -1.88638 1.86805  
 H 6.45031 -1.41538 -0.10957  
 H 4.76165 -2.44091 3.70517  
 H 6.68359 -1.65248 2.34984  
 C -3.50859 -0.27827 -0.5544  
 C -4.1741 0.55037 -1.46196  
 C -4.08688 -0.53078 0.68668  
 C -5.38337 1.14305 -1.12226  
 H -3.72087 0.74518 -2.43078  
 C -5.29886 0.06499 1.02992

|    |          |          |          |
|----|----------|----------|----------|
| H  | -3.60126 | -1.19454 | 1.39461  |
| C  | -5.94509 | 0.90795  | 0.13223  |
| H  | -5.88986 | 1.78572  | -1.83579 |
| H  | -5.73684 | -0.13473 | 2.00275  |
| H  | -6.88936 | 1.37079  | 0.40207  |
| C  | -0.57631 | 0.91071  | -0.20427 |
| C  | 0.76371  | 0.78312  | -0.29701 |
| C  | 1.02673  | 0.00136  | -1.49869 |
| N  | -1.22334 | 0.29003  | -1.29231 |
| C  | -1.39109 | 1.55992  | 0.83683  |
| C  | -1.18331 | 1.23963  | 2.18144  |
| C  | -2.39589 | 2.46775  | 0.48709  |
| C  | -1.98582 | 1.80798  | 3.16651  |
| H  | -0.40707 | 0.52579  | 2.44664  |
| C  | -3.19728 | 3.02947  | 1.47254  |
| H  | -2.55397 | 2.70769  | -0.55923 |
| C  | -2.99604 | 2.6977   | 2.81197  |
| H  | -3.98644 | 3.72039  | 1.194    |
| H  | -3.62848 | 3.13296  | 3.57932  |
| C  | 1.87873  | 1.3178   | 0.54655  |
| H  | 1.46828  | 1.75173  | 1.46378  |
| H  | 2.5272   | 0.47985  | 0.83393  |
| C  | 2.69134  | 2.3576   | -0.19997 |
| C  | 3.90529  | 2.02397  | -0.79888 |
| C  | 2.20586  | 3.661    | -0.32266 |
| C  | 4.62957  | 2.98373  | -1.50187 |
| H  | 4.27316  | 1.00441  | -0.71864 |
| C  | 2.92823  | 4.62129  | -1.02312 |
| H  | 1.25305  | 3.91963  | 0.13539  |
| C  | 4.14431  | 4.28354  | -1.61392 |
| H  | 5.57368  | 2.71407  | -1.96534 |
| H  | 2.54356  | 5.63313  | -1.10787 |
| H  | 4.7099   | 5.03137  | -2.1612  |
| O  | -0.19789 | -0.27101 | -2.07548 |
| O  | 2.05408  | -0.39672 | -1.98514 |
| Cl | -3.32429 | -3.9121  | -0.87244 |
| H  | -1.15466 | -3.21109 | -1.90694 |
| H  | -2.47444 | -2.888   | -0.15327 |
| H  | -1.8271  | 1.54883  | 4.20839  |

**- Molecular complex 4 (pathway 2)**

Symbolic Z-matrix:

Charge = 0 Multiplicity = 1

|   |          |          |         |
|---|----------|----------|---------|
| C | -0.66413 | -2.73741 | 0.23571 |
| C | -1.84013 | -1.83402 | 0.56997 |
| H | -1.62592 | -1.23514 | 1.4607  |
| C | 0.61278  | -2.46432 | 0.9157  |

|   |          |          |          |
|---|----------|----------|----------|
| H | 0.58907  | -1.81972 | 1.79085  |
| C | -2.22098 | -0.91427 | -0.60622 |
| H | -2.37962 | -1.54175 | -1.48891 |
| C | 1.77768  | -2.84374 | 0.36482  |
| H | 1.73863  | -3.38802 | -0.57768 |
| O | -0.77859 | -3.62623 | -0.59955 |
| C | 3.0986   | -2.46514 | 0.87558  |
| C | 4.15717  | -2.3121  | -0.02921 |
| C | 3.3171   | -2.19338 | 2.23312  |
| C | 5.39893  | -1.86707 | 0.4114   |
| H | 3.98122  | -2.50289 | -1.08334 |
| C | 4.56094  | -1.75677 | 2.67223  |
| H | 2.51202  | -2.34564 | 2.94667  |
| C | 5.60234  | -1.58538 | 1.76084  |
| H | 6.20873  | -1.73798 | -0.29989 |
| H | 4.72202  | -1.55506 | 3.72657  |
| H | 6.57263  | -1.24043 | 2.10419  |
| C | -3.48301 | -0.10246 | -0.36979 |
| C | -4.02379 | 0.59095  | -1.45628 |
| C | -4.09588 | 0.00642  | 0.87636  |
| C | -5.14308 | 1.3976   | -1.29477 |
| H | -3.54374 | 0.50637  | -2.42798 |
| C | -5.21924 | 0.81459  | 1.0406   |
| H | -3.69386 | -0.51697 | 1.738    |
| C | -5.74136 | 1.51606  | -0.0405  |
| H | -5.55218 | 1.93113  | -2.14714 |
| H | -5.68028 | 0.89864  | 2.01977  |
| H | -6.61568 | 2.14646  | 0.08907  |
| C | -0.41288 | 0.74668  | -0.07989 |
| C | 0.91879  | 0.57855  | -0.23812 |
| C | 1.09017  | -0.38072 | -1.31925 |
| N | -1.12725 | 0.0000   | -1.02401 |
| C | -1.14217 | 1.61547  | 0.86338  |
| C | -0.94818 | 1.47071  | 2.23916  |
| C | -2.03709 | 2.57811  | 0.38486  |
| C | -1.66336 | 2.26516  | 3.1318   |
| H | -0.24691 | 0.72387  | 2.60419  |
| C | -2.7488  | 3.36789  | 1.27837  |
| H | -2.18393 | 2.68194  | -0.68545 |
| C | -2.56728 | 3.20871  | 2.65205  |
| H | -3.45386 | 4.10225  | 0.90233  |
| H | -3.12961 | 3.82302  | 3.34828  |
| C | 2.08472  | 1.2305   | 0.43848  |
| H | 1.73459  | 1.77225  | 1.32325  |
| H | 2.77444  | 0.44729  | 0.77816  |
| C | 2.80987  | 2.17804  | -0.4968  |
| C | 3.93479  | 1.75798  | -1.20606 |
| C | 2.32902  | 3.47506  | -0.68615 |

|    |          |          |          |
|----|----------|----------|----------|
| C  | 4.57613  | 2.62752  | -2.08481 |
| H  | 4.29415  | 0.74089  | -1.07343 |
| C  | 2.96972  | 4.34555  | -1.56192 |
| H  | 1.44444  | 3.79994  | -0.14153 |
| C  | 4.09728  | 3.92257  | -2.26286 |
| H  | 5.45073  | 2.29123  | -2.63333 |
| H  | 2.5905   | 5.354    | -1.69723 |
| H  | 4.59906  | 4.60019  | -2.94679 |
| O  | -0.17356 | -0.74809 | -1.73651 |
| O  | 2.07644  | -0.84938 | -1.82913 |
| Cl | -3.64276 | -4.07525 | -1.53949 |
| H  | -2.36684 | -3.96479 | -1.21851 |
| H  | -2.70837 | -2.46994 | 0.77923  |
| H  | -1.51617 | 2.14377  | 4.20026  |

**- Molecular complex 1 (pathway 3)**

Symbolic Z-matrix:

Charge = 0 Multiplicity = 1

|   |          |          |          |
|---|----------|----------|----------|
| C | -0.78124 | -2.66766 | -0.51633 |
| C | 0.29516  | -1.89847 | -1.07348 |
| H | 0.07216  | -0.9001  | -1.43061 |
| C | -2.17313 | -2.28301 | -0.65508 |
| H | -2.86485 | -2.95688 | -0.16026 |
| C | 1.56831  | -2.36421 | -1.11936 |
| H | 1.78343  | -3.35717 | -0.73569 |
| C | -2.58814 | -1.14428 | -1.24431 |
| H | -1.8547  | -0.49208 | -1.71362 |
| O | -0.59311 | -3.7368  | 0.16395  |
| C | -3.9588  | -0.64358 | -1.29465 |
| C | -4.19187 | 0.59309  | -1.91107 |
| C | -5.04054 | -1.32595 | -0.71673 |
| C | -5.46986 | 1.13823  | -1.95387 |
| H | -3.35715 | 1.13035  | -2.35496 |
| C | -6.31599 | -0.78277 | -0.76084 |
| H | -4.88252 | -2.28103 | -0.22583 |
| C | -6.53439 | 0.45028  | -1.37824 |
| H | -5.63438 | 2.09729  | -2.43398 |
| H | -7.14559 | -1.31873 | -0.31124 |
| H | -7.53401 | 0.87205  | -1.40775 |
| C | 2.71465  | -1.61744 | -1.60259 |
| C | 3.98452  | -1.99697 | -1.14196 |
| C | 2.59354  | -0.51881 | -2.47024 |
| C | 5.1072   | -1.26993 | -1.5159  |
| H | 4.06649  | -2.8343  | -0.45349 |
| C | 3.72027  | 0.18494  | -2.86245 |
| H | 1.61708  | -0.23903 | -2.85681 |
| C | 4.97591  | -0.18385 | -2.37665 |

|    |          |          |          |
|----|----------|----------|----------|
| H  | 6.08273  | -1.54493 | -1.12989 |
| H  | 3.62537  | 1.03031  | -3.53619 |
| H  | 5.85289  | 0.38649  | -2.66489 |
| C  | 0.98038  | 0.11847  | 1.33759  |
| C  | 1.53885  | 0.99191  | 0.45549  |
| C  | 2.9787   | 0.82191  | 0.57101  |
| N  | 1.97257  | -0.55169 | 2.03458  |
| C  | -0.43021 | -0.15162 | 1.66458  |
| C  | -0.80262 | -1.34397 | 2.2993   |
| C  | -1.41961 | 0.79085  | 1.35098  |
| C  | -2.14243 | -1.5989  | 2.5796   |
| H  | -0.05659 | -2.08854 | 2.56567  |
| C  | -2.7559  | 0.53136  | 1.63781  |
| H  | -1.13716 | 1.75102  | 0.9333   |
| C  | -3.1227  | -0.66758 | 2.24514  |
| H  | -3.51204 | 1.27043  | 1.38954  |
| H  | -4.16719 | -0.86722 | 2.46606  |
| C  | 0.96635  | 1.94873  | -0.5462  |
| H  | 1.69923  | 2.01019  | -1.36182 |
| H  | 0.03876  | 1.54555  | -0.97494 |
| C  | 0.71094  | 3.35064  | -0.02391 |
| C  | -0.50794 | 3.99104  | -0.24524 |
| C  | 1.71809  | 4.03105  | 0.66738  |
| C  | -0.72848 | 5.28618  | 0.22127  |
| H  | -1.29471 | 3.47049  | -0.78959 |
| C  | 1.50025  | 5.32315  | 1.13181  |
| H  | 2.67687  | 3.54241  | 0.82285  |
| C  | 0.27581  | 5.95413  | 0.91316  |
| H  | -1.68461 | 5.76951  | 0.04423  |
| H  | 2.29007  | 5.84187  | 1.66655  |
| H  | 0.10822  | 6.96192  | 1.28015  |
| O  | 3.20047  | -0.18037 | 1.48621  |
| O  | 3.8922   | 1.40783  | 0.03756  |
| Cl | 1.73728  | -3.8358  | 1.75452  |
| H  | 0.35315  | -3.82251 | 0.67646  |
| H  | -2.41347 | -2.53173 | 3.06452  |
| H  | 1.94384  | -1.58221 | 2.06542  |

**- Transition state 1 (pathway 3)**

Symbolic Z-matrix:

Charge = 0 Multiplicity = 1

|   |         |         |          |
|---|---------|---------|----------|
| C | 1.16051 | 1.59564 | 0.76649  |
| C | 0.23767 | 1.51404 | -0.24882 |
| H | 0.6404  | 1.54523 | -1.25398 |
| C | 2.60516 | 1.56811 | 0.49249  |
| H | 3.21431 | 2.05084 | 1.25207  |
| C | -1.1888 | 1.52284 | -0.08294 |

H -1.53974 1.75267 0.92522  
 C 3.16117 0.91483 -0.53802  
 H 2.50921 0.35919 -1.21328  
 O 0.9338 1.72994 2.06075  
 C 4.59459 0.81691 -0.83462  
 C 5.02966 -0.14592 -1.75399  
 C 5.55045 1.64571 -0.22958  
 C 6.38038 -0.29337 -2.0501  
 H 4.29601 -0.78701 -2.23706  
 C 6.89877 1.49998 -0.5254  
 H 5.23354 2.41904 0.46343  
 C 7.31948 0.52862 -1.43414  
 H 6.69854 -1.04725 -2.76324  
 H 7.62624 2.15159 -0.05172  
 H 8.37441 0.4201 -1.66511  
 C -2.02734 2.17369 -1.11936  
 C -3.1821 2.84688 -0.7039  
 C -1.70523 2.14849 -2.48197  
 C -3.9922 3.49362 -1.62986  
 H -3.43865 2.85731 0.35353  
 C -2.52244 2.78547 -3.40679  
 H -0.8159 1.62761 -2.82542  
 C -3.66542 3.4616 -2.98235  
 H -4.88167 4.01647 -1.29425  
 H -2.26677 2.75758 -4.46121  
 H -4.30069 3.96034 -3.70749  
 C -1.53352 -0.71901 1.21209  
 C -1.83934 -0.40869 -0.15264  
 C -3.29664 -0.16475 -0.1236  
 N -2.58499 -0.40952 1.97653  
 C -0.2872 -1.1189 1.84251  
 C -0.1908 -1.16536 3.24544  
 C 0.84291 -1.39934 1.06321  
 C 1.02603 -1.4423 3.84471  
 H -1.05881 -0.96433 3.86358  
 C 2.05983 -1.67978 1.67217  
 H 0.77338 -1.38867 -0.01568  
 C 2.15392 -1.69005 3.06  
 H 2.93481 -1.87753 1.06127  
 H 3.10687 -1.90002 3.53561  
 C -1.29727 -1.0207 -1.42242  
 H -1.93756 -0.63899 -2.22778  
 H -0.28272 -0.657 -1.62171  
 C -1.3156 -2.53675 -1.43655  
 C -0.15745 -3.26148 -1.71774  
 C -2.50227 -3.23403 -1.18876  
 C -0.17364 -4.65447 -1.73835  
 H 0.76876 -2.73063 -1.93028

C -2.52092 -4.62425 -1.20681  
 H -3.42108 -2.68372 -1.00181  
 C -1.35553 -5.33933 -1.4776  
 H 0.73818 -5.20162 -1.95694  
 H -3.45018 -5.15116 -1.01387  
 H -1.37168 -6.42453 -1.48971  
 O -3.65597 0.00431 1.1965  
 O -4.0915 -0.0733 -1.01498  
 Cl -1.75256 1.92596 3.48001  
 H -0.01393 1.81606 2.36157  
 H 1.09949 -1.45755 4.92656  
 H -2.43787 0.30586 2.77694

**- Molecular complex 2 (pathway 3)**

Symbolic Z-matrix:

Charge = 0 Multiplicity = 1  
 C -1.47602 -1.18006 0.94605  
 C -0.53222 -1.34159 0.00053  
 H -0.88581 -1.50428 -1.01129  
 C -2.91392 -1.10633 0.65104  
 H -3.56089 -1.41788 1.46786  
 C 0.95039 -1.39616 0.23559  
 H 1.14367 -1.53852 1.30808  
 C -3.4255 -0.61543 -0.48546  
 H -2.74043 -0.2209 -1.23662  
 O -1.26392 -1.03736 2.2772  
 C -4.85147 -0.50298 -0.81826  
 C -5.23739 0.33481 -1.87209  
 C -5.84913 -1.19494 -0.11707  
 C -6.57797 0.49669 -2.20533  
 H -4.47215 0.86752 -2.43204  
 C -7.18789 -1.03392 -0.44837  
 H -5.57164 -1.87651 0.68131  
 C -7.5588 -0.18569 -1.49156  
 H -6.8558 1.15367 -3.02366  
 H -7.94711 -1.57956 0.10344  
 H -8.60603 -0.06552 -1.75035  
 C 1.58516 -2.59059 -0.46199  
 C 2.47968 -3.39544 0.24569  
 C 1.29437 -2.9207 -1.78844  
 C 3.07523 -4.50045 -0.35338  
 H 2.71767 -3.14804 1.27835  
 C 1.8922 -4.02237 -2.3929  
 H 0.59348 -2.31991 -2.36156  
 C 2.7838 -4.81629 -1.67696  
 H 3.76812 -5.11259 0.21511  
 H 1.65574 -4.26266 -3.42484

|    |          |          |          |
|----|----------|----------|----------|
| H  | 3.24694  | -5.67749 | -2.14813 |
| C  | 1.37462  | 0.97808  | 0.97479  |
| C  | 1.69192  | -0.0217  | -0.11876 |
| C  | 3.17083  | -0.23629 | 0.17623  |
| N  | 2.35384  | 1.10067  | 1.80511  |
| C  | 0.11253  | 1.68267  | 1.28379  |
| C  | -0.05097 | 2.2726   | 2.54639  |
| C  | -0.93377 | 1.77076  | 0.36057  |
| C  | -1.2339  | 2.91881  | 2.8743   |
| H  | 0.75493  | 2.22099  | 3.27025  |
| C  | -2.12003 | 2.41729  | 0.69162  |
| H  | -0.83582 | 1.31255  | -0.61515 |
| C  | -2.27462 | 2.98941  | 1.94979  |
| H  | -2.92844 | 2.45791  | -0.032   |
| H  | -3.20369 | 3.48567  | 2.2116   |
| C  | 1.5452   | 0.40395  | -1.59064 |
| H  | 2.00563  | -0.39683 | -2.17912 |
| H  | 0.48689  | 0.44139  | -1.86614 |
| C  | 2.2362   | 1.7144   | -1.90695 |
| C  | 1.5713   | 2.93725  | -1.78087 |
| C  | 3.57295  | 1.71692  | -2.3187  |
| C  | 2.2275   | 4.13469  | -2.05118 |
| H  | 0.52969  | 2.95929  | -1.47374 |
| C  | 4.23019  | 2.91389  | -2.58812 |
| H  | 4.09908  | 0.7724   | -2.42316 |
| C  | 3.56009  | 4.12656  | -2.45349 |
| H  | 1.69394  | 5.07467  | -1.94916 |
| H  | 5.26775  | 2.8963   | -2.90683 |
| H  | 4.0721   | 5.0602   | -2.66461 |
| O  | 3.45251  | 0.34671  | 1.38071  |
| O  | 3.99769  | -0.81676 | -0.46017 |
| Cl | 1.55421  | -0.83166 | 4.16297  |
| H  | -0.32419 | -1.1078  | 2.51161  |
| H  | -1.34734 | 3.36148  | 3.85843  |
| H  | 2.0717   | 0.17018  | 3.50932  |
